# Supplementary material for: PIDA-promoted metal-free [3 + 2] heteroannulation of β-ketothioamides with 4-hydroxy coumarins: chemo-/regioselective access to furo[3,2- c ]chromen-4-ones at room temperature
Source: Royal Society of Chemistry journal article supplement (doi:10.1039/d4ob00438h), 2024-01-01
Supplement: d4ob00438h1.pdf [file d4ob00438h1.pdf]

## Supporting Information

### PIDA-Promoted metal-free [3 + 2] heteroannulation of $\beta$ -ketothioamides with 4-hydroxy coumarins: chemo-/regioselective access to furo[3,2-c]chromen-4-ones at room temperature

Anup Kumar Yadav, Dhananjay Yadav, Vipin Kumar, Subhasish Ray and Maya Shankar Singh\*

Department of Chemistry, Institute of Science, Banaras Hindu University, Varanasi 221005, India

#### Table of contents:

|     |                                                                       |       |
|-----|-----------------------------------------------------------------------|-------|
| 1   | General Information                                                   | 2     |
| 2.  | General Experimental Procedure for the Synthesis of Compound <b>3</b> | 2-3   |
| 3.  | Scale-up Synthesis of Compound <b>3a</b>                              | 3     |
| 4.  | Characterization data of <b>3a-3zd</b>                                | 3-14  |
| 5.  | Copies of $^1\text{H}$ and $^{13}\text{C}$ NMR Spectra                | 15-45 |
| 6.  | Crystal data and structural refinement                                | 46    |
| 6.1 | X-Ray Crystallographic Data & ORTEP diagram of <b>3a</b>              | 46-47 |
| 6.2 | X-Ray Crystallographic Data & ORTEP diagram of <b>3d</b>              | 48    |
| 7.  | HRMS spectra of reaction mixture                                      | 49    |
| 8.  | AAS Data of compound <b>2c</b>                                        | 50    |

**1. General Information.** The commercially available solvents and reagents were used as received without any further purification. The  $\beta$ -ketothioamides were synthesized by the reported procedure.<sup>1</sup> Toluene was purchased from Merck. PIDA and Coumarins were purchased from Sigma Aldrich. All the reactions were monitored by analytical thin layer chromatography (TLC) using Merck pre-coated aluminium sheets, and visualized by a UV lamp. Flash column chromatography was performed on silica gel (230-400 mesh). The  $^1\text{H}$  and  $^{13}\text{C}$  NMR spectra were recorded on a JEOL 500 FT-NMR spectrometer operating at 500 and 125 MHz, respectively. Chemical shifts ( $\delta$ ) for  $^1\text{H}$  and  $^{13}\text{C}\{^1\text{H}\}$  NMR are given in parts per million (ppm) using the residual solvent peaks as a reference relative to tetramethylsilane (TMS). Coupling constant ( $J$ ) values are reported in Hertz (Hz). High-resolution mass spectra (HRMS,  $m/z$ ) were recorded in EI or ESI mode, on Sciex X500R QTOF instrument. All the reactions were carried out using a single-neck round bottom (25 mL) borosilicate flask. Melting points have been determined with Büchi B-540 melting point apparatus and are uncorrected. IUPAC names were obtained using the ChemDraw (version 19.1) software.

1. X. M. Zeng, C. Y. Meng, J. X. Bao, D. C. Xu, J. W. Xie and W. D. Zhu, *J. Org. Chem.*, 2015, **80**, 11521-11528.

## 2. General Experimental Procedure for the Synthesis of Compounds 3.

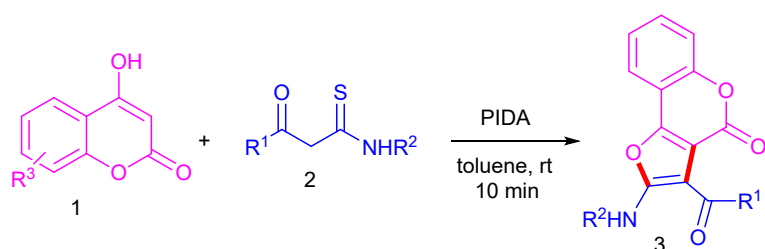

4-Hydroxycoumarins **1** (0.3 mmol),  $\beta$ -ketothioamides **2** (0.25 mmol) and PIDA (1.5 equiv.) were added into a 25 mL oven-dried single neck round bottom flask followed by addition of 2.0 mL of toluene. The reaction mixture was allowed to stir at room temperature for 10 min in an open atmosphere. After completion of the reaction (monitored by TLC), the reaction was quenched with

water (10 mL) followed by extraction with ethyl acetate (15 mL) and water (2×10 mL). The combined organic layer was dried over anhydrous Na<sub>2</sub>SO<sub>4</sub> and the solvent was evaporated under reduced pressure. The crude residue thus obtained was purified by silica gel column chromatography to give the pure product **3** (20:1 hexane/ethyl acetate). The isolated product was dried under a vacuum and then the analytical studies were performed.

### 3. Scale-up Synthesis of Compounds **3a**

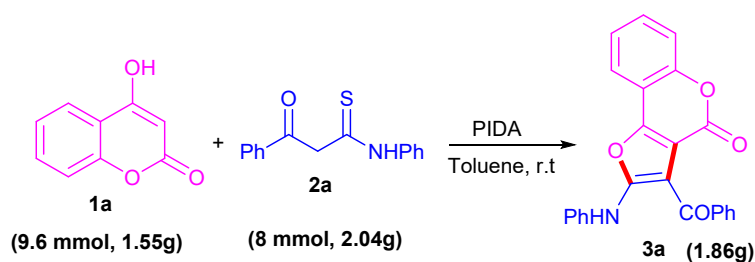

4-Hydroxycoumarin **1a** (9.6 mmol, 1.55 g),  $\beta$ -ketothioamide **2a** (8.0 mmol, 2.04 g) and PIDA (12.0 mmol, 3.86 g) were added into a 100 mL oven-dried single neck round bottom flask followed by addition of 10.0 mL of toluene. The reaction mixture was allowed to stir at room temperature for 20 min in an open atmosphere. After completion of the reaction (monitored by TLC), the reaction was quenched with water (50 mL) followed by extraction with ethyl acetate (2×30 mL) and water (2×20 mL). The combined organic layer was dried over anhydrous Na<sub>2</sub>SO<sub>4</sub> and the solvent was evaporated under reduced pressure. The crude residue thus obtained was purified by silica gel column chromatography to give the pure product **3a** (1.86 g, 61%).

### 4. Characterization data of compounds **3a-3zd**

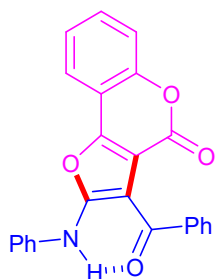

*3-benzoyl-2-(phenylamino)-4H-furo[3,2-c]chromen-4-one (3a)*: Isolated yield (61 mg, 64%); Brown solid crystal; mp. 170-172 °C. Isolation: hexane/ethyl acetate (20/1) as the eluent. <sup>1</sup>H NMR (500 MHz, CDCl<sub>3</sub>):  $\delta$  10.69 (s, 1H), 7.85 (d, *J* = 10.0 Hz, 1H), 7.73-7.71 (m, 2H), 7.58-7.46 (m, 8H),

7.42-7.36 (m, 2H), 7.23-7.21 (m, 1H);  $^{13}\text{C}\{^1\text{H}\}$  NMR (125 MHz,  $\text{CDCl}_3$ ):  $\delta$  190.6, 161.2, 156.0, 152.1, 149.8, 140.0, 136.9, 132.0, 130.3, 129.8, 128.7, 127.8, 124.8, 124.6, 120.2, 119.8, 117.1, 111.8, 108.4, 95.9; HRMS (ESI-TOF,  $[\text{M} + \text{H}]^+$ ): Calcd for  $\text{C}_{24}\text{H}_{15}\text{NO}_4$ , 382.1074, found 382.1068.

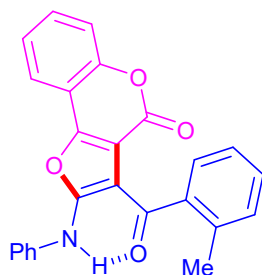

**3-(2-methylbenzoyl)-2-(phenylamino)-4H-furo[3,2-c]chromen-4-one (3b)**: Isolated yield (64 mg, 65%); Yellow solid powder; mp. 252-254 °C. Isolation: hexane/ethyl acetate (20/1) as the eluent.  $^1\text{H}$  NMR (500 MHz,  $\text{CDCl}_3$ ):  $\delta$  11.06 (s, 1H), 7.82-7.81 (m, 1H), 7.57-7.56 (m, 2H), 7.50-7.45 (m, 3H), 7.39 (t,  $J = 7.5$  Hz, 1H), 7.36-7.33 (m, 2H), 7.31-7.28 (m, 2H), 7.24-7.21 (m, 2H), 2.43 (s, 3H);  $^{13}\text{C}\{^1\text{H}\}$  NMR (125 MHz,  $\text{CDCl}_3$ ):  $\delta$  193.0, 161.0, 155.5, 152.1, 149.7, 140.9, 136.7, 135.4, 130.5, 130.2, 130.0, 129.8, 127.4, 125.1, 125.0, 124.5, 120.1, 120.0, 117.0, 111.8, 108.2, 97.2, 19.7; HRMS (ESI-TOF,  $[\text{M} + \text{H}]^+$ ): Calcd for  $\text{C}_{25}\text{H}_{17}\text{NO}_4$ , 396.1230, found 396.1228.

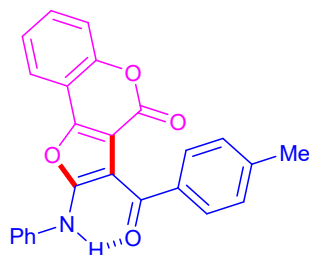

**3-(4-methylbenzoyl)-2-(phenylamino)-4H-furo[3,2-c]chromen-4-one (3c)**: Isolated yield (65 mg, 66%); yellow solid powder; mp. 262-264 °C. Isolation: hexane/ethyl acetate (20/1) as the eluent.  $^1\text{H}$  NMR (500 MHz,  $\text{CDCl}_3$ ):  $\delta$  10.61 (s, 1H), 7.85 (d,  $J = 5.0$  Hz, 1H), 7.64 (d,  $J = 5.0$  Hz, 2H), 7.52-7.44 (m, 6H), 7.41 (d,  $J = 10.0$  Hz, 1H), 7.37 (t,  $J = 7.5$  Hz, 1H), 7.25 (s, 1H), 7.21 (t,  $J = 7.5$  Hz, 1H), 2.44 (s, 3H);  $^{13}\text{C}\{^1\text{H}\}$  NMR (125 MHz,  $\text{CDCl}_3$ ):  $\delta$  190.3, 161.0, 156.2, 152.1, 149.8, 142.7, 137.2, 137.1, 130.2, 129.8, 129.0, 128.6, 124.7, 124.6, 120.2, 119.7, 117.1, 111.9, 108.6, 96.0, 21.9; HRMS (ESI-TOF,  $[\text{M} + \text{H}]^+$ ): Calcd for  $\text{C}_{25}\text{H}_{17}\text{NO}_4$ , 396.1230, found 396.1238.

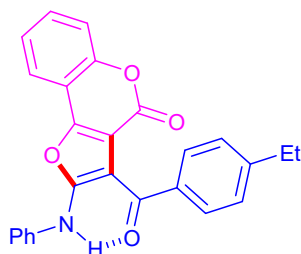

**3-(4-ethylbenzoyl)-2-(phenylamino)-4H-furo[3,2-c]chromen-4-one (3d)**: Isolated yield (70 mg, 68%); Brown solid crystal; mp. 183-185 °C. Isolation: hexane/ethyl acetate (20/1) as the eluent.  $^1\text{H}$  NMR (500 MHz,  $\text{CDCl}_3$ ):  $\delta$  10.61 (s, 1H), 7.82 (d,  $J = 10.0$  Hz, 1H), 7.65 (d,  $J = 10.0$  Hz, 2H), 7.50-7.48 (m, 3H), 7.45-7.43 (m, 2H), 7.38 (d,  $J = 5.0$  Hz, 1H), 7.35 (t,  $J = 7.5$  Hz, 1H), 7.27-7.25 (m, 2H), 7.19 (t,  $J = 7.5$  Hz, 1H), 2.73 (q,  $J = 8.3$  Hz, 2H), 1.28 (t,  $J = 7.5$  Hz, 3H);  $^{13}\text{C}\{^1\text{H}\}$  NMR (125 MHz,  $\text{CDCl}_3$ ):  $\delta$  190.2, 161.0, 156.1, 152.0, 149.7, 148.8, 137.4, 137.0, 130.2, 129.8, 129.1, 127.3,

124.7, 124.6, 120.2, 119.6, 117.0, 111.9, 108.6, 96.0, 29.1, 15.2; HRMS (ESI-TOF,  $[M + H]^+$ ): Calcd for  $C_{26}H_{19}NO_4$ , 410.1387, found 410.1389.

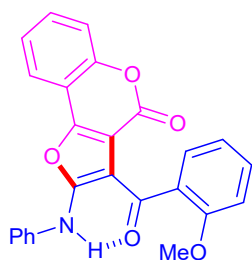

**3-(2-methoxybenzoyl)-2-(phenylamino)-4H-furo[3,2-c]chromen-4-one (3e):** Isolated yield (66 mg, 64%); Yellow solid powder; mp. 212-214 °C. Isolation: hexane/ethyl acetate (20/1) as the eluent.  $^1H$  NMR (500 MHz,  $CDCl_3$ ):  $\delta$  11.17 (s, 1H), 7.82 (d,  $J = 10.0$  Hz, 1H), 7.56-7.54 (m, 2H), 7.51-7.45 (m, 5H), 7.37-7.33 (m, 2H), 7.22 (t,  $J = 7.5$  Hz, 1H), 7.06 (t,  $J = 7.5$  Hz, 1H), 6.95 (d,  $J = 10.0$  Hz, 1H), 3.73 (s, 3H);  $^{13}C\{^1H\}$  NMR (125 MHz,  $CDCl_3$ ):  $\delta$  189.5, 160.9, 157.8, 156.0, 151.9, 149.3, 136.9, 132.2, 130.6, 130.0, 129.7, 129.2, 124.7, 124.5, 120.3, 120.1, 119.9, 116.9, 111.9, 110.7, 108.8, 98.2, 55.2; HRMS (ESI-TOF,  $[M + H]^+$ ): Calcd for  $C_{25}H_{17}NO_5$ , 412.1179, found 412.1179.

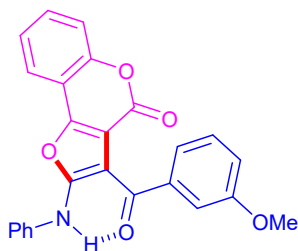

**3-(3-methoxybenzoyl)-2-(phenylamino)-4H-furo[3,2-c]chromen-4-one (3f):** Isolated yield (60 mg, 58%); Yellow solid powder; mp. 202-204 °C. Isolation: hexane/ethyl acetate (20/1) as the eluent.  $^1H$  NMR (500 MHz,  $CDCl_3$ ):  $\delta$  10.64 (s, 1H), 7.82 (d,  $J = 5.0$  Hz, 1H), 7.49 (t,  $J = 7.5$  Hz, 3H), 7.46-7.43 (m, 2H), 7.39-7.31 (m, 4H), 7.24 (d,  $J = 5.0$  Hz, 1H), 7.20 (t,  $J = 7.5$  Hz, 1H), 7.09-7.07 (m, 1H), 3.83 (s, 3H);  $^{13}C\{^1H\}$  NMR (125 MHz,  $CDCl_3$ ):  $\delta$  190.3, 161.2, 159.3, 156.0, 152.2, 149.9, 141.2, 136.9, 130.3, 129.8, 128.8, 124.9, 124.6, 121.5, 120.2, 119.8, 118.3, 117.1, 113.4, 111.8, 108.5, 96.0, 55.5; HRMS (ESI-TOF,  $[M + H]^+$ ): Calcd for  $C_{25}H_{17}NO_5$ , 434.0999, found 434.1011.

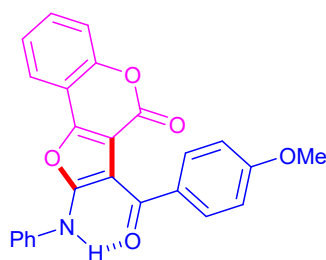

**3-(4-methoxybenzoyl)-2-(phenylamino)-4H-furo[3,2-c]chromen-4-one (3g):** Isolated yield (68 mg, 66%); Brown solid crystal; mp. 111-113 °C. Isolation: hexane/ethyl acetate (20/1) as the eluent.  $^1H$  NMR (500 MHz,  $CDCl_3$ ):  $\delta$  10.55 (s, 1H), 7.86 (d,  $J = 5.0$  Hz, 1H), 7.75-7.74 (m, 2H), 7.50 (t,  $J = 7.5$  Hz, 3H), 7.47-7.42 (m, 3H), 7.38 (t,  $J = 7.5$  Hz, 1H), 7.21 (t,  $J = 7.5$  Hz, 1H), 6.95 (d,  $J = 10.0$  Hz, 2H), 3.88 (s, 3H);  $^{13}C\{^1H\}$  NMR (125 MHz,  $CDCl_3$ ):  $\delta$  189.2, 163.1, 160.9, 156.3, 152.1, 149.8, 137.2, 132.4, 131.3, 130.2, 129.8, 124.6, 124.6, 120.3, 119.6, 117.1, 113.2, 111.9, 108.7, 96.0, 55.5; HRMS (ESI-TOF,  $[M + Na]^+$ ): Calcd for  $C_{25}H_{17}NO_5$ , 434.0999, found 434.1013.

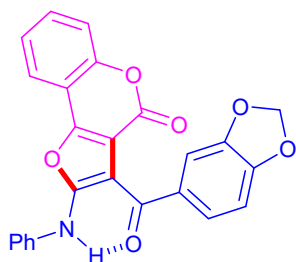

**3-(benzo[d][1,3]dioxole-5-carbonyl)-2-(phenylamino)-4H-furo[3,2-c]chromen-4-one (3h):** Isolated yield (74 mg, 70%); Brown solid crystal; mp. 185-187 °C. Isolation: hexane/ethyl acetate (20/1) as the eluent.  $^1\text{H}$  NMR (500 MHz,  $\text{CDCl}_3$ ):  $\delta$  10.48 (s, 1H), 7.84 (d,  $J = 5.0$  Hz, 1H), 7.51-7.48 (m, 3H), 7.45 (t,  $J = 7.5$  Hz, 2H), 7.41 (d,  $J = 10.0$  Hz, 1H), 7.37 (t,  $J = 7.5$  Hz, 1H), 7.30 (d,  $J = 5.0$  Hz, 1H), 7.24 (s, 1H), 7.21 (t,  $J = 7.5$  Hz, 1H), 6.84 (d,  $J = 10.0$  Hz, 1H), 6.05 (s, 2H);  $^{13}\text{C}\{^1\text{H}\}$  NMR (125 MHz,  $\text{CDCl}_3$ ):  $\delta$  188.8, 160.9, 156.2, 152.1, 151.2, 149.8, 147.5, 137.0, 134.1, 130.2, 129.8, 125.1, 124.7, 124.6, 120.2, 119.6, 117.1, 111.8, 109.02, 108.6, 107.5, 101.7, 95.9; HRMS (ESI-TOF,  $[\text{M} + \text{Na}]^+$ ): Calcd for  $\text{C}_{25}\text{H}_{15}\text{NO}_6$ , 448.0792, found 448.0800.

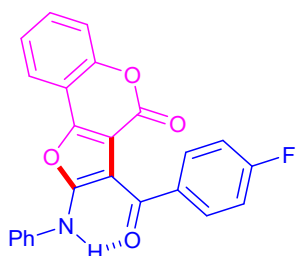

**3-(4-fluorobenzoyl)-2-(phenylamino)-4H-furo[3,2-c]chromen-4-one (3i):** Isolated yield (52 mg, 52%); Yellow solid crystal; mp. 188-190 °C. Isolation: hexane/ethyl acetate (20/1) as the eluent.  $^1\text{H}$  NMR (500 MHz,  $\text{CDCl}_3$ ):  $\delta$  10.65 (s, 1H), 7.85 (d,  $J = 5.0$  Hz, 1H), 7.74-7.72 (m, 2H), 7.52-7.50 (m, 3H), 7.48-7.45 (m, 2H), 7.42 (d,  $J = 5.0$  Hz, 1H), 7.38 (t,  $J = 7.5$  Hz, 1H), 7.23 (t,  $J = 5.0$  Hz, 1H), 7.12 (t,  $J = 7.5$  Hz, 2H);  $^{13}\text{C}\{^1\text{H}\}$  NMR (125 MHz,  $\text{CDCl}_3$ ):  $\delta$  189.0, 166.2, 164.2, 161.3, 156.2, 152.1, 150.0, 136.8, 136.2, 131.3, 131.2, 130.4, 129.8, 124.9, 124.7, 120.3, 119.9, 117.1, 115.1, 114.9, 111.8, 108.3, 95.8; HRMS (ESI-TOF,  $[\text{M} + \text{H}]^+$ ): Calcd for  $\text{C}_{24}\text{H}_{14}\text{FNO}_4$ , 400.0980, found 400.0992.

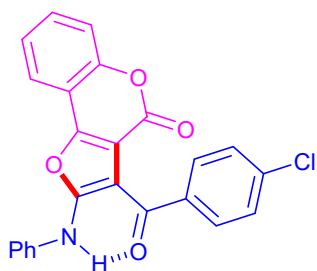

**3-(4-chlorobenzoyl)-2-(phenylamino)-4H-furo[3,2-c]chromen-4-one (3j):** Isolated yield (57 mg, 55%); Yellow solid crystal; mp. 210-212 °C. Isolation: hexane/ethyl acetate (20/1) as the eluent.  $^1\text{H}$  NMR (500 MHz,  $\text{CDCl}_3$ ):  $\delta$  10.68 (s, 1H), 7.84 (d,  $J = 10.0$  Hz, 1H), 7.65 (d,  $J = 10.0$  Hz, 2H), 7.53-7.51 (m, 2H), 7.47 (t,  $J = 7.5$  Hz, 3H), 7.42 (d,  $J = 10.0$  Hz, 3H), 7.38 (t,  $J = 7.5$  Hz, 1H), 7.23 (d,  $J = 10.0$  Hz, 1H);  $^{13}\text{C}\{^1\text{H}\}$  NMR (125 MHz,  $\text{CDCl}_3$ ):  $\delta$  189.2, 161.4, 156.2, 152.2, 150.0, 138.3, 138.2, 136.8, 130.5, 130.2, 129.9, 128.2, 125.1, 124.7, 120.3, 119.9, 117.2, 111.8, 108.3, 95.8; HRMS (ESI-TOF,  $[\text{M} + \text{Na}]^+$ ): Calcd for  $\text{C}_{24}\text{H}_{14}\text{ClNO}_4$ , 438.0504, found 438.0516.

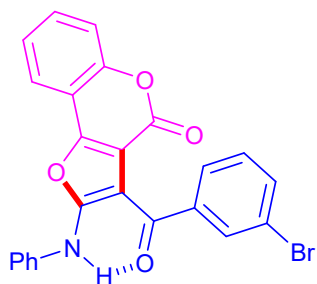

**3-(3-bromobenzoyl)-2-(phenylamino)-4H-furo[3,2-c]chromen-4-one (3k):** Isolated yield (63 mg, 55%); Yellow solid powder; mp. 255-257 °C. Isolation: hexane/ethyl acetate (20/1) as the eluent.  $^1\text{H}$  NMR (500 MHz,  $\text{CDCl}_3$ ):  $\delta$  10.72 (s, 1H), 7.85-7.84 (m, 2H), 7.68-7.67 (m, 1H), 7.61-7.60 (m, 1H), 7.54-7.47 (m, 5H), 7.43-7.42 (m, 1H), 7.38 (t,  $J = 7.5$  Hz, 1H), 7.32 (t,  $J = 7.5$  Hz, 1H), 7.23 (s, 1H);  $^{13}\text{C}\{^1\text{H}\}$  NMR (125 MHz,  $\text{CDCl}_3$ ):  $\delta$  188.9, 161.5, 156.0, 152.2, 150.1, 141.8, 136.6, 134.7, 131.6, 130.5, 129.9, 129.3, 127.3, 125.2, 124.7, 122.0, 120.3, 120.0, 117.2, 111.7, 108.1, 95.7; HRMS (ESI-TOF,  $[\text{M} + \text{H}]^+$ ): Calcd for  $\text{C}_{24}\text{H}_{14}\text{BrNO}_4$ , 460.0179, found 460.0203.

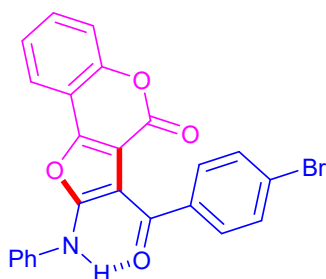

**3-(4-bromobenzoyl)-2-(phenylamino)-4H-furo[3,2-c]chromen-4-one (3l):** Isolated yield (68 mg, 59%); Brown solid powder; mp. 93-95 °C. Isolation: hexane/ethyl acetate (20/1) as the eluent.  $^1\text{H}$  NMR (500 MHz,  $\text{CDCl}_3$ ):  $\delta$  10.69 (s, 1H), 7.84 (d,  $J = 10.0$  Hz, 1H), 7.58 (s, 3H), 7.53-7.46 (m, 5H), 7.43-7.36 (m, 3H), 7.24-7.22 (m, 1H);  $^{13}\text{C}\{^1\text{H}\}$  NMR (125 MHz,  $\text{CDCl}_3$ ):  $\delta$  189.3, 161.4, 156.2, 152.1, 150.0, 138.7, 136.7, 131.1, 130.5, 130.3, 129.9, 129.1, 126.8, 125.1, 124.7, 120.3, 119.9, 117.1, 111.7, 108.2, 95.7; HRMS (ESI-TOF,  $[\text{M} + \text{Na}]^+$ ): Calcd for  $\text{C}_{24}\text{H}_{14}\text{BrNO}_4$ , 460.0179, found 460.0209.

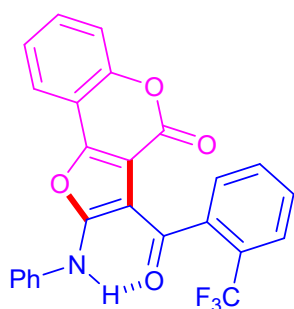

**2-(phenylamino)-3-(2-(trifluoromethyl)benzoyl)-4H-furo[3,2-c]chromen-4-one (3m):** Isolated yield (56 mg, 50%); Yellow solid powder; mp. 185-187 °C. Isolation: hexane/ethyl acetate (20/1) as the eluent.  $^1\text{H}$  NMR (500 MHz,  $\text{CDCl}_3$ ):  $\delta$  11.02 (s, 1H), 7.81-7.77 (m, 2H), 7.59-7.57 (m, 4H), 7.51-7.45 (m, 3H), 7.41 (s, 1H), 7.36-7.32 (m, 3H);  $^{13}\text{C}\{^1\text{H}\}$  NMR (125 MHz,  $\text{CDCl}_3$ ):  $\delta$  189.9, 161.1, 155.6, 152.1, 149.8, 140.0, 136.4, 131.3, 130.4, 129.9, 129.5, 127.6, 127.4, 127.1, 126.3, 126.3, 125.4, 125.3, 124.6, 120.3, 120.2, 117.1, 111.7, 107.9, 96.9; HRMS (ESI-TOF,  $[\text{M} + \text{H}]^+$ ): Calcd for  $\text{C}_{25}\text{H}_{14}\text{F}_3\text{NO}_4$ , 450.0948, found 450.0963.

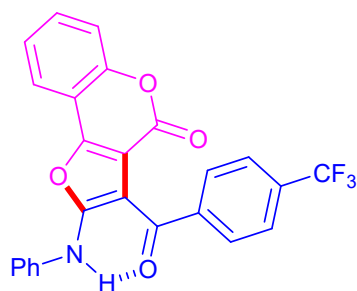

**2-(phenylamino)-3-(4-(trifluoromethyl)benzoyl)-4H-furo[3,2-c]chromen-4-one (3n):** Isolated yield (58 mg, 52%); White solid powder, mp. 245-247 °C. Isolation: hexane/ethyl acetate (20/1) as the eluent.  $^1\text{H}$  NMR (500 MHz,  $\text{CDCl}_3$ ):  $\delta$  10.77 (s, 1H), 7.83 (d,  $J = 10.0$  Hz, 1H), 7.77 (d,  $J = 5.0$  Hz, 2H), 7.70 (d,  $J = 5.0$  Hz, 2H), 7.52 (t,  $J = 5.0$  Hz, 3H), 7.49-7.46 (m, 2H), 7.40 (d,  $J = 10.0$  Hz, 1H), 7.36 (d,  $J = 10.0$  Hz, 1H), 7.25 (t,  $J = 7.5$  Hz, 1H);  $^{13}\text{C}\{^1\text{H}\}$  NMR (125 MHz,  $\text{CDCl}_3$ ):  $\delta$  189.3, 161.6, 156.1, 152.2, 150.1, 143.2, 136.5, 133.3, 133.0, 130.6, 129.9, 128.8, 125.3, 124.9, 124.8, 120.3, 120.1, 117.2, 111.7, 108.0, 95.8; HRMS (ESI-TOF,  $[\text{M} + \text{H}]^+$ ): Calcd for  $\text{C}_{25}\text{H}_{14}\text{F}_3\text{NO}_4$ , 450.0948, found 450.0968.

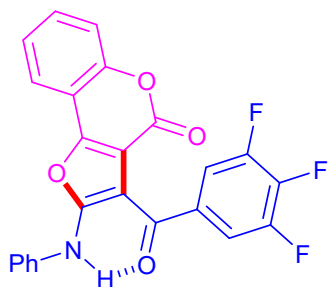

**2-(phenylamino)-3-(3,4,5-trifluorobenzoyl)-4H-furo[3,2-c]chromen-4-one (3o):** Isolated yield (52 mg, 48%); Brown solid crystal; mp. 172-174 °C. Isolation: hexane/ethyl acetate (20/1) as the eluent.  $^1\text{H}$  NMR (500 MHz,  $\text{CDCl}_3$ ):  $\delta$  10.63 (s, 1H), 7.85 (d,  $J = 5.0$  Hz, 1H), 7.56-7.48 (m, 5H), 7.45-7.43 (m, 1H), 7.39 (t,  $J = 7.5$  Hz, 1H), 7.32 (t,  $J = 5.0$  Hz, 2H), 7.28 (s, 1H);  $^{13}\text{C}\{^1\text{H}\}$  NMR (125 MHz,  $\text{CDCl}_3$ ):  $\delta$  186.7, 161.7, 156.1, 152.2, 150.4, 136.4, 135.7, 130.8, 129.9, 129.2, 125.5, 125.1, 124.9, 120.4, 120.2, 117.2, 113.3, 113.3, 113.2, 113.1, 111.6, 107.8, 95.3; HRMS (ESI-TOF,  $[\text{M} + \text{Na}]^+$ ): Calcd for  $\text{C}_{24}\text{H}_{12}\text{F}_3\text{NO}_4$ , 436.0791, found 436.0799.

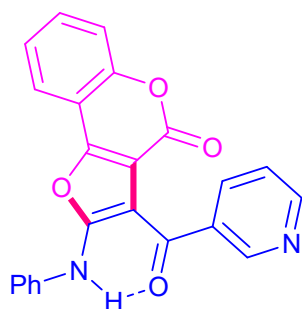

**3-nicotinoyl-2-(phenylamino)-4H-furo[3,2-c]chromen-4-one (3p):** Isolated yield (48 mg, 50%); Brown solid; mp. 92-94 °C. Isolation: hexane/ethyl acetate (5/1) as the eluent.  $^1\text{H}$  NMR (500 MHz,  $\text{CDCl}_3$ ):  $\delta$  10.86 (s, 1H), 8.93 (s, 1H), 8.78 (s, 1H), 8.11 (d,  $J = 10.0$  Hz, 1H), 7.90 (d,  $J = 5.0$  Hz, 1H), 7.81 (d,  $J = 10.0$  Hz, 1H), 7.55-7.53 (m, 2H), 7.51-7.48 (m, 3H), 7.40-7.35 (m, 2H), 7.29-7.27 (m, 1H);  $^{13}\text{C}\{^1\text{H}\}$  NMR (125 MHz,  $\text{CDCl}_3$ ):  $\delta$  187.9, 161.6, 156.2, 152.1, 151.7, 150.2, 149.3, 136.4,



136.2, 135.9, 130.6, 129.9, 125.3, 124.8, 123.0, 120.3, 120.1, 117.1, 111.6, 107.9, 95.8; HRMS (ESI-TOF,  $[M + H]^+$ ): Calcd for  $C_{23}H_{14}N_2O_4$ , 383.1026, found 383.1032.

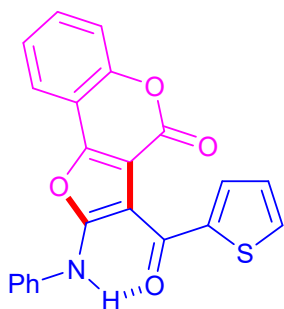

**2-(phenylamino)-3-(thiophene-2-carbonyl)-4H-furo[3,2-c]chromen-4-one (3q):** Isolated yield (63 mg, 65%); Brown solid crystal; mp. 180-182 °C. Isolation: hexane/ethyl acetate (20/1) as the eluent.  $^1H$  NMR (500 MHz,  $CDCl_3$ ):  $\delta$  10.38 (s, 1H), 7.85 (d,  $J = 10.0$  Hz, 1H), 7.68 (d,  $J = 5.0$  Hz, 1H), 7.58 (d,  $J = 5.0$  Hz, 1H), 7.52 (t,  $J = 7.5$  Hz, 1H), 7.49-7.46 (m, 3H), 7.45-7.43 (m, 2H), 7.38 (t,  $J = 7.5$  Hz, 1H), 7.21 (t,  $J = 7.5$  Hz, 1H), 7.14 (t,  $J = 5.0$  Hz, 1H);  $^{13}C\{^1H\}$  NMR (125 MHz,  $CDCl_3$ ):  $\delta$  181.2, 160.9, 156.4, 152.1, 150.3, 143.7, 137.0, 133.9, 133.0, 130.4, 129.8, 127.5, 124.8, 124.7, 120.3, 119.7, 117.1, 111.8, 108.2, 95.8; HRMS (ESI-TOF,  $[M + Na]^+$ ): Calcd for  $C_{22}H_{13}NO_4S$ , 410.0457, found 410.0462.

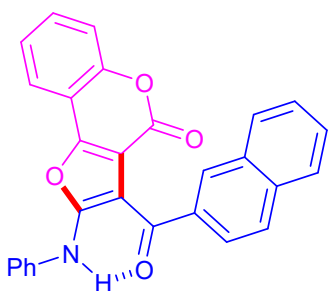

**3-(2-naphthoyl)-2-(phenylamino)-4H-furo[3,2-c]chromen-4-one (3r):** Isolated yield (67 mg, 62%); Brown solid crystal; mp. 215-217 °C. Isolation: hexane/ethyl acetate (20/1) as the eluent.  $^1H$  NMR (500 MHz,  $CDCl_3$ ):  $\delta$  10.74 (s, 1H), 8.22 (s, 1H), 7.92-7.86 (m, 4H), 7.83 (d,  $J = 10.0$  Hz, 1H), 7.58-7.54 (m, 3H), 7.52-7.46 (m, 4H), 7.42-7.37 (m, 2H), 7.23 (t,  $J = 7.5$  Hz, 1H);  $^{13}C\{^1H\}$  NMR (125 MHz,  $CDCl_3$ ):  $\delta$  190.4, 161.2, 156.1, 152.1, 149.9, 137.2, 136.9, 135.3, 132.4, 130.3, 130.1, 129.8, 129.5, 128.0, 127.8, 127.7, 126.5, 125.1, 124.8, 124.7, 120.3, 119.8, 117.1, 111.9, 108.6, 96.2; HRMS (ESI-TOF,  $[M + Na]^+$ ): Calcd for  $C_{28}H_{17}NO_4$ , 452.1050, found 452.1063.

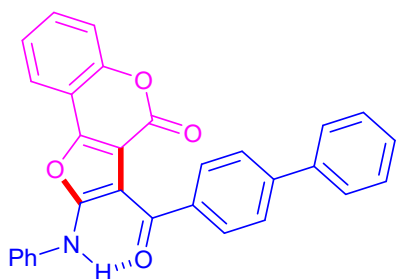

**3-(1,1'-biphenyl-4-carbonyl)-2-(phenylamino)-4H-furo[3,2-c]chromen-4-one (3s):** Isolated yield (78 mg, 68%); Yellow solid powder; mp. 210-212 °C. Isolation: hexane/ethyl acetate (20/1) as the eluent.  $^1H$  NMR (500 MHz,  $CDCl_3$ ):  $\delta$  10.70 (s, 1H), 7.85 (d,  $J = 10.0$  Hz, 1H), 7.82-7.80 (m, 2H),

7.69-7.66 (m, 4H), 7.52 (t,  $J = 10.0$  Hz, 3H), 7.49-7.44 (m, 4H), 7.42-7.41 (m, 1H), 7.37 (t,  $J = 7.5$ , 2H), 7.23 (t,  $J = 7.5$  Hz, 1H);  $^{13}\text{C}\{^1\text{H}\}$  NMR (125 MHz,  $\text{CDCl}_3$ ):  $\delta$  189.9, 161.2, 156.2, 152.1, 149.9, 144.7, 140.5, 138.6, 136.9, 130.3, 129.8, 129.5, 128.9, 127.9, 127.4, 126.5, 124.8, 124.6, 120.3, 119.8, 117.1, 111.8, 108.5, 96.0; HRMS (ESI-TOF,  $[\text{M} + \text{H}]^+$ ): Calcd for  $\text{C}_{30}\text{H}_{19}\text{NO}_4$ , 459.1465, found 459.1443.

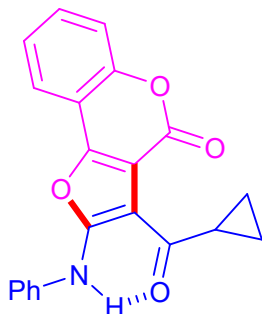

**3-(cyclopropanecarbonyl)-2-(phenylamino)-4H-furo[3,2-c]chromen-4-one (3t):** Isolated yield (47 mg, 55%); Yellow solid crystal; mp. 178-180 °C. Isolation: hexane/ethyl acetate (20/1) as the eluent.  $^1\text{H}$  NMR (500 MHz,  $\text{CDCl}_3$ ):  $\delta$  11.21 (s, 1H), 7.82 (d,  $J = 10.0$  Hz, 1H), 7.53-7.42 (m, 6H), 7.37 (t,  $J = 7.5$  Hz, 1H), 7.19 (t,  $J = 7.5$  Hz, 1H), 3.88 -3.83 (m, 1H), 1.25-1.23 (m, 2H), 1.10-1.08 (m, 2H);  $^{13}\text{C}\{^1\text{H}\}$  NMR (125 MHz,  $\text{CDCl}_3$ ):  $\delta$  196.9, 160.0, 157.7, 151.8, 149.7, 137.0, 130.2, 129.7, 124.8, 124.6, 120.2, 119.7, 117.0, 111.9, 108.5, 97.0, 19.5, 12.3; HRMS (ESI-TOF,  $[\text{M} + \text{Na}]^+$ ): Calcd for  $\text{C}_{21}\text{H}_{15}\text{NO}_4$ , 368.0893, found 368.0900.

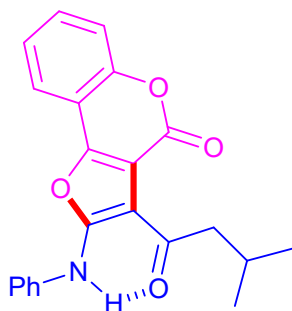

**3-(3-methylbutanoyl)-2-(phenylamino)-4H-furo[3,2-c]chromen-4-one (3u):** Isolated yield (52 mg, 58%); Yellow solid crystal; mp. 170-172 °C. Isolation: hexane/ethyl acetate (20/1) as the eluent.  $^1\text{H}$  NMR (500 MHz,  $\text{CDCl}_3$ ):  $\delta$  11.19 (s, 1H), 7.81 (d,  $J = 10.0$  Hz, 1H), 7.52-7.49 (m, 3H), 7.45 (t,  $J = 7.5$  Hz, 3H), 7.36 (t,  $J = 5.0$  Hz, 1H), 7.20 (t,  $J = 7.5$  Hz, 1H), 3.21 (d,  $J = 5.0$  Hz, 2H), 2.27-2.19 (m, 1H), 1.04 (d,  $J = 5.0$  Hz, 6H);  $^{13}\text{C}\{^1\text{H}\}$  NMR (125 MHz,  $\text{CDCl}_3$ ):  $\delta$  197.6, 160.6, 157.3, 151.9, 149.5, 137.0, 130.1, 129.7, 124.7, 120.2, 119.8, 117.0, 111.9, 108.2, 96.6, 50.9, 26.6, 22.7; HRMS (ESI-TOF,  $[\text{M} + \text{H}]^+$ ): Calcd for  $\text{C}_{22}\text{H}_{19}\text{NO}_4$ , 362.1387, found 362.1397.

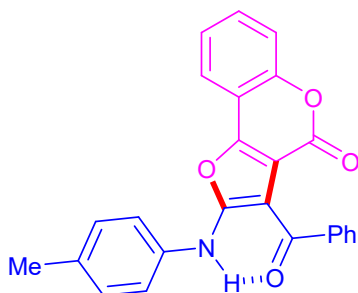

**3-benzoyl-2-(*p*-tolylamino)-4*H*-furo[3,2-*c*]chromen-4-one (3v):** Isolated yield (64 mg, 65%); Brown solid crystal; mp. 182-184 °C. Isolation: hexane/ethyl acetate (20/1) as the eluent. <sup>1</sup>H NMR (500 MHz, CDCl<sub>3</sub>): δ 10.64 (s, 1H), 7.80 (d, *J* = 10.0 Hz, 1H), 7.70 (d, *J* = 5.0 Hz, 2H), 7.55 (t, *J* = 7.5 Hz, 1H), 7.49-7.43 (m, 4H), 7.40-7.37 (m, 3H), 7.34 (t, *J* = 7.5 Hz, 1H), 7.24 (s, 1H), 2.39 (s, 3H); <sup>13</sup>C{<sup>1</sup>H} NMR (125 MHz, CDCl<sub>3</sub>): δ 190.4, 161.4, 156.1, 152.0, 149.7, 140.1, 134.8, 134.2, 131.9, 130.3, 130.1, 128.7, 127.8, 124.6, 120.2, 120.0, 117.0, 111.8, 108.5, 95.6, 21.0; HRMS (ESI-TOF, [M + H]<sup>+</sup>): Calcd for C<sub>25</sub>H<sub>17</sub>NO<sub>4</sub>, 396.1230, found 396.1232.

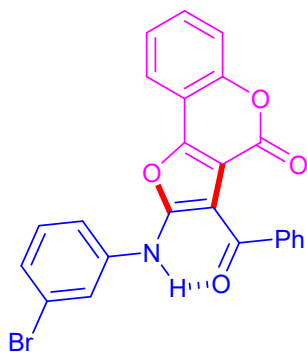

**3-benzoyl-2-((3-bromophenyl)amino)-4*H*-furo[3,2-*c*]chromen-4-one (3w):** Isolated yield (57 mg, 50%); Yellow solid crystal; mp. 214-216 °C. Isolation: hexane/ethyl acetate (20/1) as the eluent. <sup>1</sup>H NMR (500 MHz, CDCl<sub>3</sub>): δ 10.62 (s, 1H), 7.84 (d, *J* = 10.0 Hz, 1H), 7.76 (s, 1H), 7.71 (d, *J* = 10.0 Hz, 2H), 7.57 (t, *J* = 7.5 Hz, 1H), 7.52 (t, *J* = 10.0 Hz, 1H), 7.46 (t, *J* = 7.5 Hz, 2H), 7.43-7.39 (m, 3H), 7.33-7.31 (m, 2H); <sup>13</sup>C{<sup>1</sup>H} NMR (125 MHz, CDCl<sub>3</sub>): δ 190.8, 160.5, 156.0, 152.2, 150.1, 139.7, 138.3, 132.3, 131.1, 130.5, 128.8, 127.9, 127.6, 124.8, 123.4, 122.5, 120.3, 118.2, 117.2, 111.7, 108.4, 96.6; HRMS (ESI-TOF, [M + Na]<sup>+</sup>): Calcd for C<sub>24</sub>H<sub>14</sub>BrNO<sub>4</sub>, 481.9998, found 482.0009.

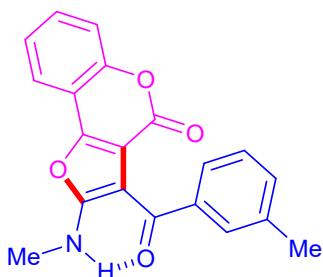

**2-(methylamino)-3-(3-methylbenzoyl)-4*H*-furo[3,2-*c*]chromen-4-one (3x):** Isolated yield (50 mg, 60%); Yellow solid powder; mp. 215-217 °C. Isolation: hexane/ethyl acetate (20/1) as the eluent. <sup>1</sup>H NMR (500 MHz, CDCl<sub>3</sub>): δ 8.57 (s, 1H), 7.80-7.78 (m, 1H), 7.47-7.44 (m, 2H), 7.41-7.37 (m, 2H), 7.35-7.29 (m, 3H), 3.31 (s, 3H), 2.40 (s, 3H); <sup>13</sup>C{<sup>1</sup>H} NMR (125 MHz, CDCl<sub>3</sub>): δ 190.2, 166.0, 156.2, 151.8, 149.2, 140.4, 137.3, 132.3, 129.7, 129.0, 127.5, 125.9, 124.4, 120.0, 117.0, 112.1, 109.1, 93.9, 28.8, 21.5; HRMS (ESI-TOF, [M + Na]<sup>+</sup>): Calcd for C<sub>20</sub>H<sub>15</sub>NO<sub>4</sub>, 334.1074, found 334.1083.

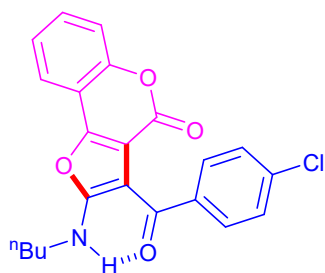

**2-(butylamino)-3-(4-chlorobenzoyl)-4H-furo[3,2-c]chromen-4-one (3y):** Isolated yield (65 mg, 66%); Yellow solid crystal; mp. 194-196 °C. Isolation: hexane/ethyl acetate (20/1) as the eluent. <sup>1</sup>H NMR (500 MHz, CDCl<sub>3</sub>): δ 8.69 (s, 1H), 7.78 (d, *J* = 5.0 Hz, 1H), 7.58 (d, *J* = 5.0 Hz, 2H), 7.47 (t, *J* = 7.5 Hz, 1H), 7.39-7.37 (m, 3H), 7.34 (t, *J* = 7.5 Hz, 1H), 3.66 (q, *J* = 6.6 Hz, 2H), 1.79-1.73 (m, 2H), 1.55-1.47 (m, 2H), 1.01 (t, *J* = 7.5 Hz, 3H); <sup>13</sup>C{<sup>1</sup>H} NMR (125 MHz, CDCl<sub>3</sub>): δ 188.4, 165.7, 156.3, 151.9, 149.4, 138.9, 137.5, 130.0, 129.9, 127.9, 124.5, 120.1, 117.0, 112.0, 108.8, 93.4, 42.4, 31.9, 20.0, 13.7; HRMS (ESI-TOF, [M + Na]<sup>+</sup>): Calcd for C<sub>22</sub>H<sub>18</sub>ClNO<sub>4</sub>, 418.0817, found 418.0819.

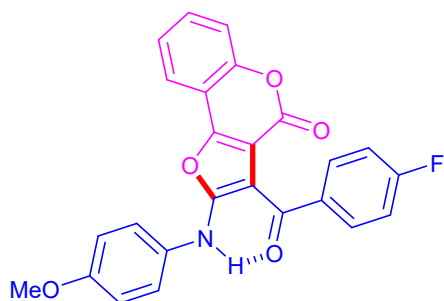

**3-(4-fluorobenzoyl)-2-((4-methoxyphenyl)amino)-4H-furo[3,2-c]chromen-4-one (3z):** Isolated yield (71 mg, 66%); Brown solid crystal; mp. 170-172 °C. Isolation: hexane/ethyl acetate (20/1) as the eluent. <sup>1</sup>H NMR (500 MHz, CDCl<sub>3</sub>): δ 10.58 (s, 1H), 7.79 (d, *J* = 5.0 Hz, 1H), 7.73-7.70 (m, 2H), 7.50-7.47 (m, 1H), 7.43 (d, *J* = 10.0 Hz, 2H), 7.40 (d, *J* = 10.0 Hz, 1H), 7.36-7.33 (m, 1H), 7.11 (t, *J* = 7.5 Hz, 2H), 7.00 (d, *J* = 10.0 Hz, 2H), 3.86 (s, 3H); <sup>13</sup>C{<sup>1</sup>H} NMR (125 MHz, CDCl<sub>3</sub>): δ 188.8, 166.1, 164.1, 161.8, 157.2, 156.2, 152.0, 149.7, 136.3, 131.2, 131.1, 130.2, 129.6, 124.6, 122.0, 120.2, 117.0, 115.0, 114.8, 111.8, 108.4, 95.0, 55.7; HRMS (ESI-TOF, [M + H]<sup>+</sup>): Calcd for C<sub>25</sub>H<sub>16</sub>FNO<sub>5</sub>, 430.1085, found 430.1097.

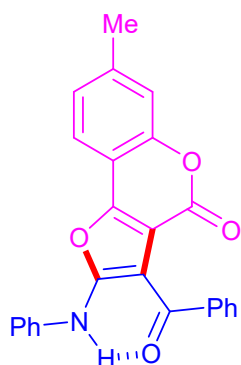

**3-benzoyl-7-methyl-2-(phenylamino)-4H-furo[3,2-c]chromen-4-one (3za):** Isolated yield (73 mg, 74%); Yellow solid powder; mp. 210-212 °C. Isolation: hexane/ethyl acetate (20/1) as the eluent. <sup>1</sup>H NMR (500 MHz, CDCl<sub>3</sub>): δ 10.70 (s, 1H), 7.72 (d, *J* = 5.0 Hz, 3H), 7.56 (t, *J* = 7.5 Hz, 1H), 7.53-7.51 (m, 2H), 7.48-7.44 (m, 4H), 7.23-7.20 (m, 2H), 7.18 (d, *J* = 10.0 Hz, 1H), 2.47 (s, 3H); <sup>13</sup>C{<sup>1</sup>H} NMR (125 MHz, CDCl<sub>3</sub>): δ 188.4, 165.7, 156.3, 151.9, 149.4, 138.9, 137.5, 130.0, 129.9, 127.9, 124.5, 120.1, 117.0, 112.0, 108.8, 93.4, 42.4, 31.9, 20.0, 13.7; HRMS (ESI-TOF, [M + Na]<sup>+</sup>): Calcd for C<sub>22</sub>H<sub>18</sub>ClNO<sub>4</sub>, 418.0817, found 418.0819.

NMR (125 MHz, CDCl<sub>3</sub>):  $\delta$  190.6, 161.0, 156.3, 152.3, 150.3, 141.5, 140.1, 137.0, 131.9, 129.8, 128.7, 127.8, 125.8, 124.7, 119.9, 119.8, 117.3, 109.3, 107.5, 95.9, 21.9.; HRMS (ESI-TOF, [M + H]<sup>+</sup>): Calcd for C<sub>25</sub>H<sub>17</sub>NO<sub>4</sub>, 396.1230, found 396.1226.

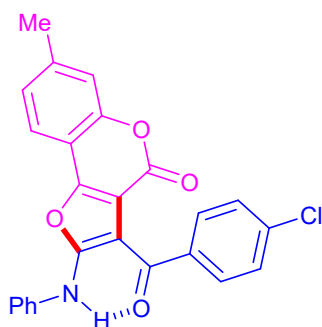

**3-(4-chlorobenzoyl)-7-methyl-2-(phenylamino)-4H-furo[3,2-c]chromen-4-one (3zb):** Isolated yield (67 mg, 62%); Yellow solid powder; mp. 215-217 °C. Isolation: hexane/ethyl acetate (20/1) as the eluent. <sup>1</sup>H NMR (500 MHz, CDCl<sub>3</sub>):  $\delta$  10.69 (s, 1H), 7.72 (d, *J* = 5.0 Hz, 1H), 7.65 (d, *J* = 5.0 Hz, 2H), 7.52-7.51 (m, 2H), 7.48-7.45 (m, 2H), 7.42 (d, *J* = 10.0 Hz, 2H), 7.23 (t, *J* = 7.5 Hz, 2H), 7.19 (d, *J* = 5.0 Hz, 1H), 2.48 (s, 3H); <sup>13</sup>C{<sup>1</sup>H} NMR (125 MHz, CDCl<sub>3</sub>):  $\delta$  189.1, 161.2, 156.4, 152.4, 150.5, 141.7, 138.4, 138.1, 136.8, 130.2, 129.8, 128.1, 125.9, 124.9, 120.0, 119.9, 117.3, 109.2, 107.2, 95.7, 22.0; HRMS (ESI-TOF, [M + Na]<sup>+</sup>): Calcd for C<sub>25</sub>H<sub>16</sub>ClNO<sub>4</sub>, 430.0841, found 430.0848.

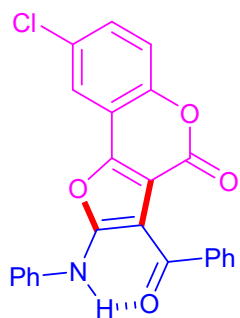

**3-benzoyl-8-chloro-2-(phenylamino)-4H-furo[3,2-c]chromen-4-one (3zc):** Isolated yield (66 mg, 64%); Brown solid crystal; mp. 180-182 °C. Isolation: hexane/ethyl acetate (20/1) as the eluent. <sup>1</sup>H NMR (500 MHz, CDCl<sub>3</sub>):  $\delta$  10.68 (s, 1H), 7.78 (s, 1H), 7.70 (d, *J* = 10.0 Hz, 2H), 7.57 (t, *J* = 7.5 Hz, 1H), 7.51-7.49 (m, 4H), 7.47-7.44 (m, 3H), 7.43-7.42 (m, 1H), 7.35-7.33 (m, 1H); <sup>13</sup>C{<sup>1</sup>H} NMR (125 MHz, CDCl<sub>3</sub>):  $\delta$  190.6, 161.4, 155.5, 150.3, 148.3, 139.9, 136.6, 132.1, 130.2, 130.1, 129.9, 128.7, 127.9, 125.1, 120.0, 119.6, 118.5, 112.9, 109.4, 96.0; HRMS (ESI-TOF, [M + H]<sup>+</sup>): Calcd for C<sub>24</sub>H<sub>14</sub>ClNO<sub>4</sub>, 416.0684, found 416.0682.

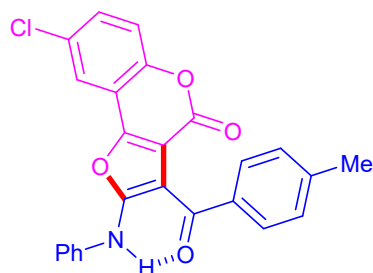

*8-chloro-3-(4-methylbenzoyl)-2-(phenylamino)-4H-furo[3,2-c]chromen-4-one (3zd)*: Isolated yield (77 mg, 72%); Brown solid crystal; mp. 192-194 °C. Isolation: hexane/ethyl acetate (20/1) as the eluent. <sup>1</sup>H NMR (500 MHz, CDCl<sub>3</sub>): δ 10.61 (s, 1H), 7.78-7.77 (m, 1H), 7.62 (d, *J* = 10.0 Hz, 2H), 7.50-7.47 (m, 5H), 7.44-7.42 (m, 1H), 7.36-7.34 (m, 1H), 7.25-7.22 (m, 2H), 2.44 (s, 3H); <sup>13</sup>C{<sup>1</sup>H} NMR (125 MHz, CDCl<sub>3</sub>): δ 190.2, 161.2, 155.6, 150.3, 148.2, 142.9, 137.1, 136.8, 130.2, 130.1, 129.9, 128.9, 128.6, 125.0, 119.8, 119.6, 118.5, 113.0, 109.5, 96.0, 21.9; HRMS (ESI-TOF, [M + Na]<sup>+</sup>): Calcd for C<sub>25</sub>H<sub>16</sub>ClNO<sub>4</sub>, 430.0841, found 430.0851.

## 5. Copies of $^1\text{H}$ and $^{13}\text{C}$ NMR Spectra

### $^1\text{H}$ and $^{13}\text{C}\{^1\text{H}\}$ NMR spectra of Compound 3a

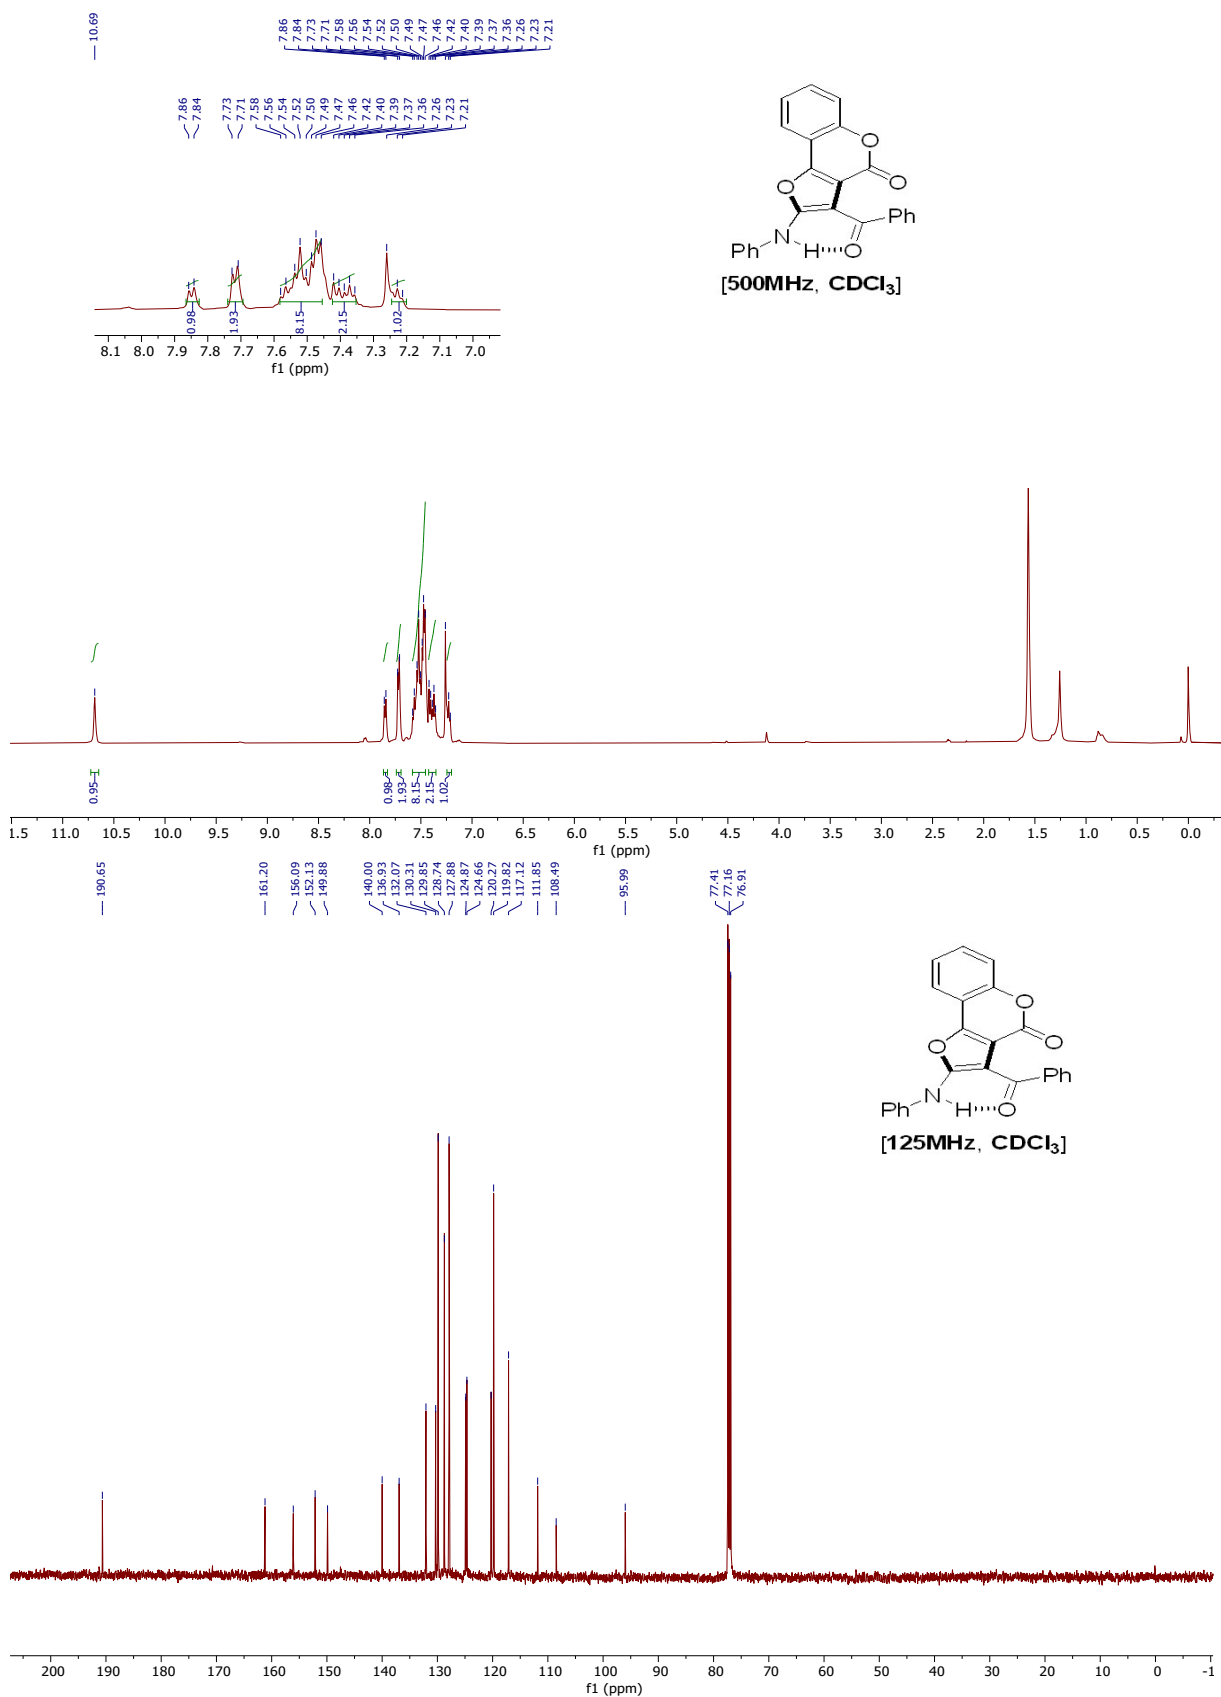

# $^1\text{H}$ and $^{13}\text{C}\{^1\text{H}\}$ NMR spectra of Compound 3b

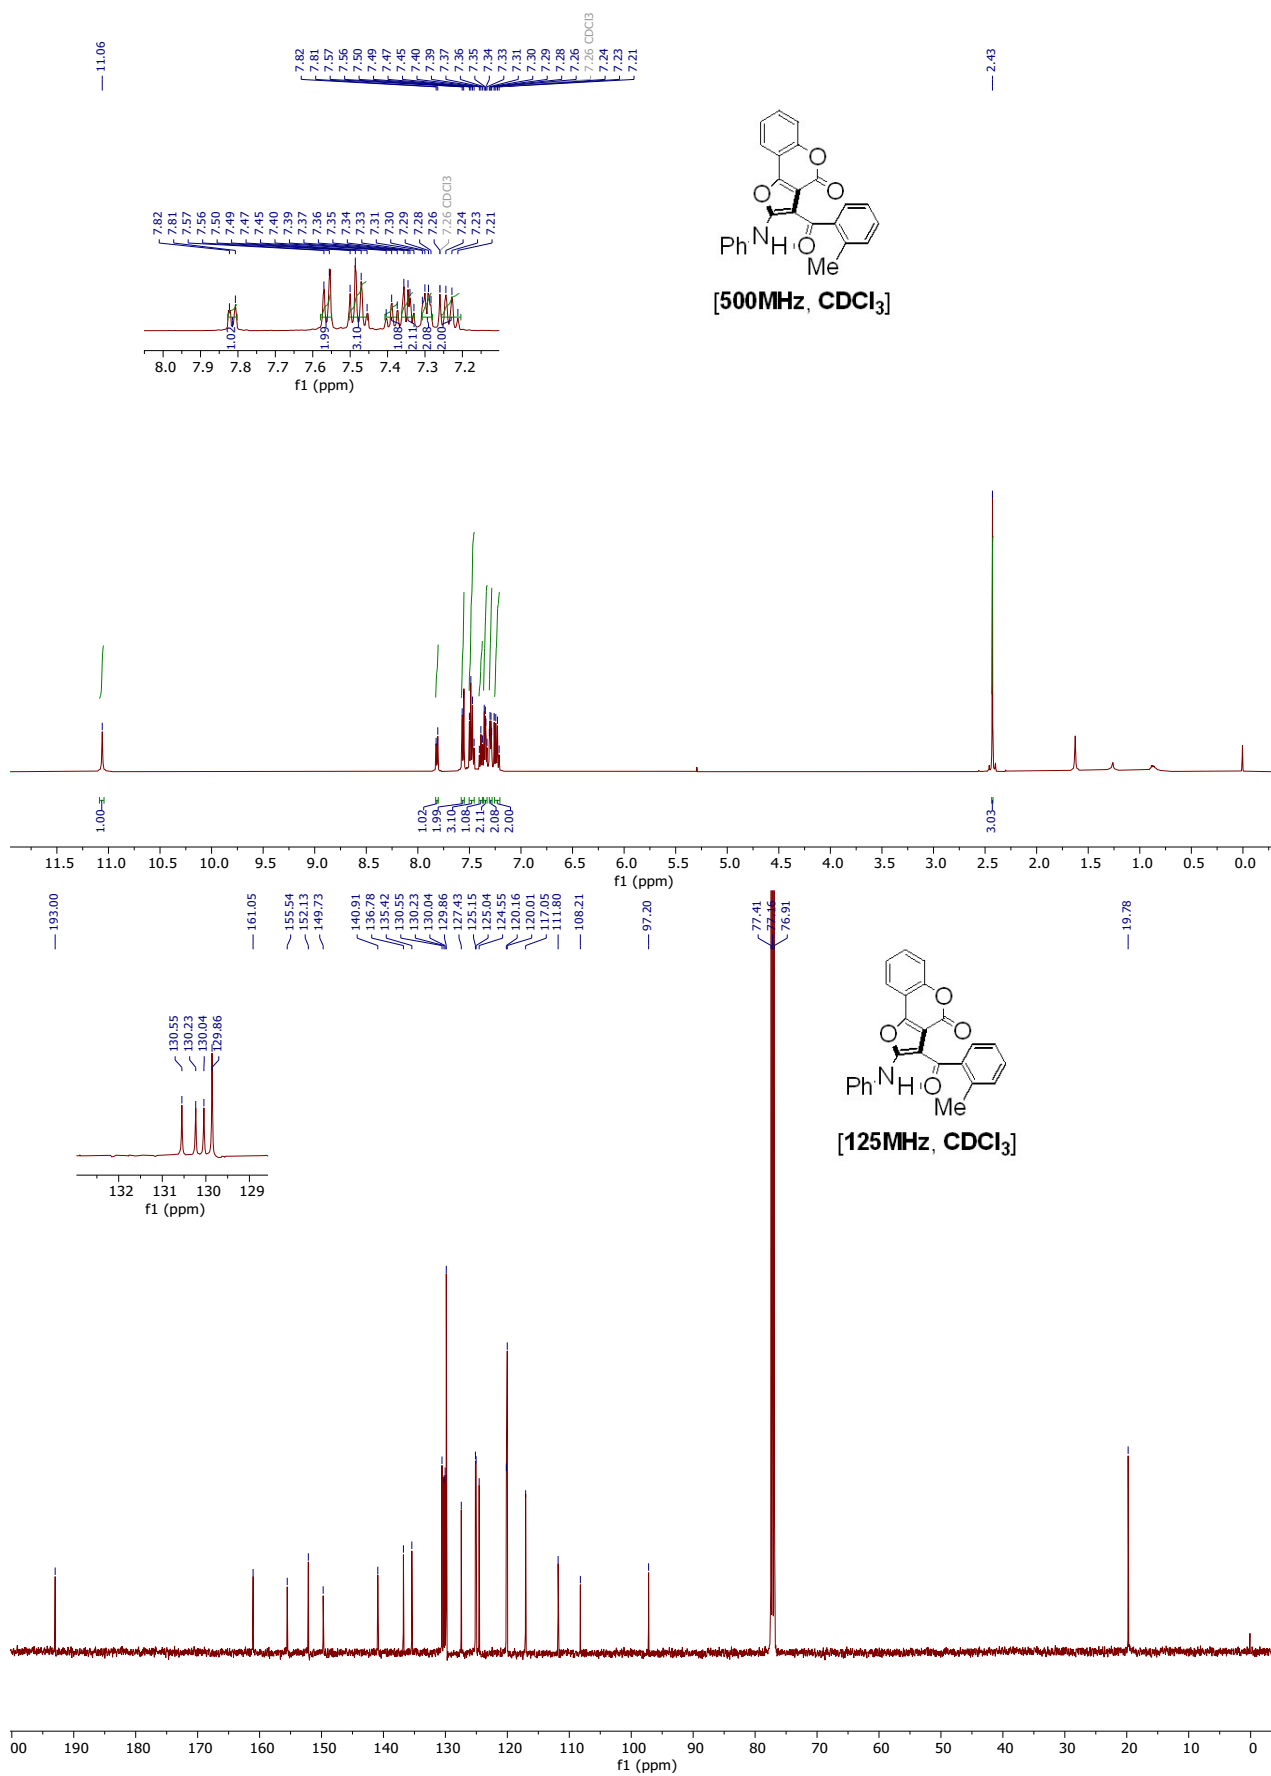





# $^1\text{H}$ and $^{13}\text{C}\{^1\text{H}\}$ NMR spectra of Compound 3d

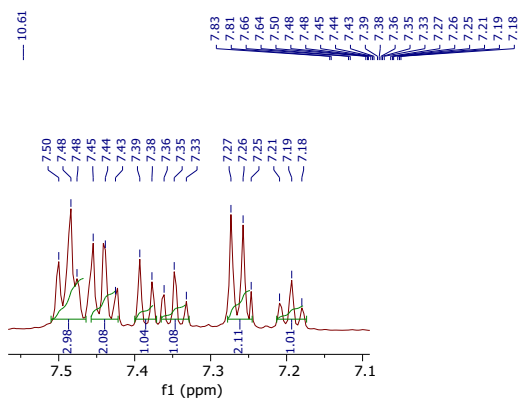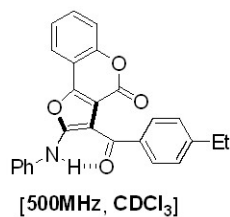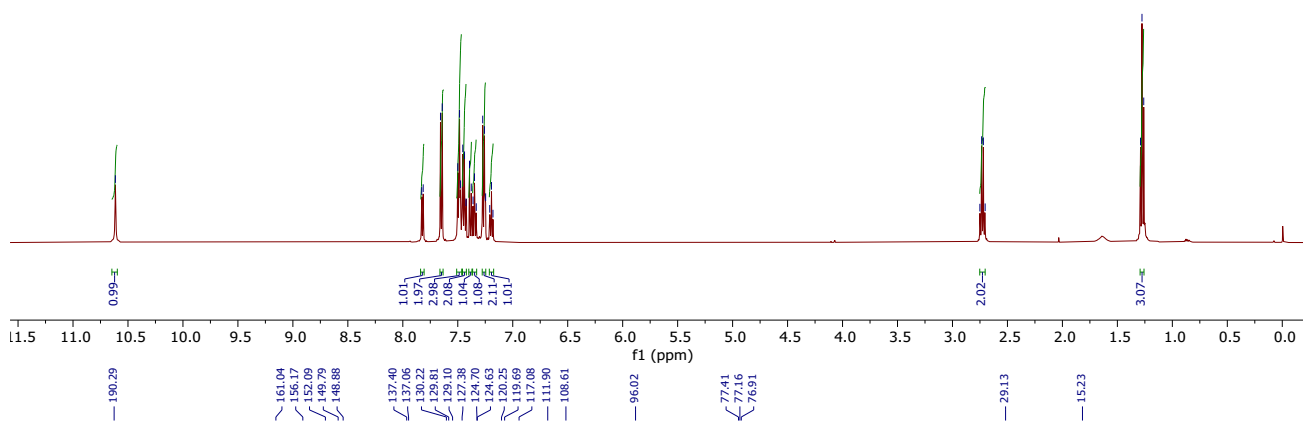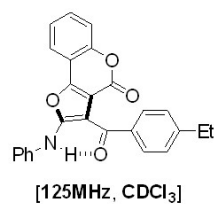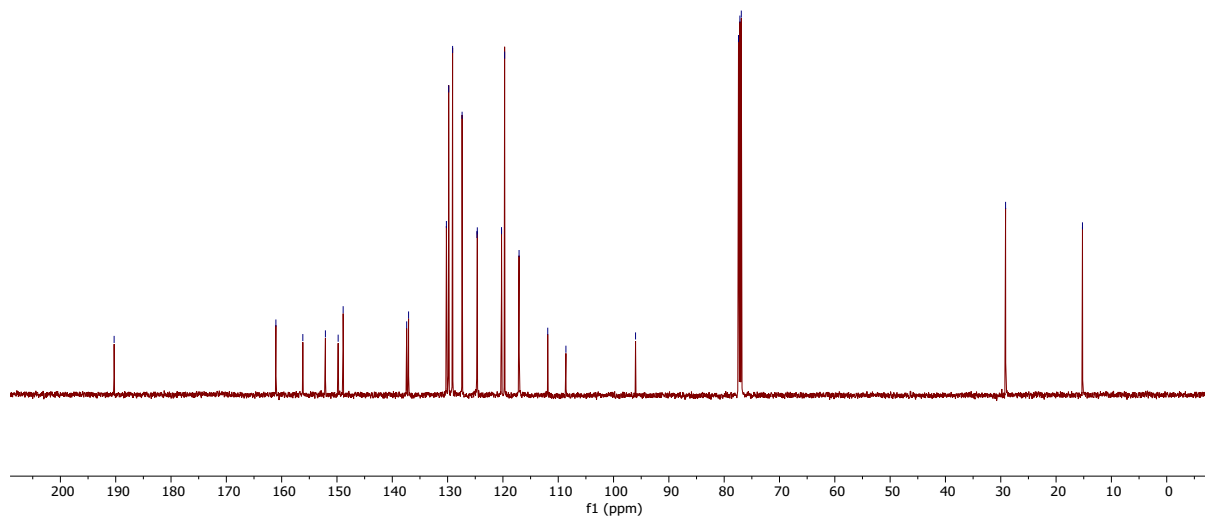

# $^1\text{H}$ and $^{13}\text{C}\{^1\text{H}\}$ NMR spectra of Compound 3e

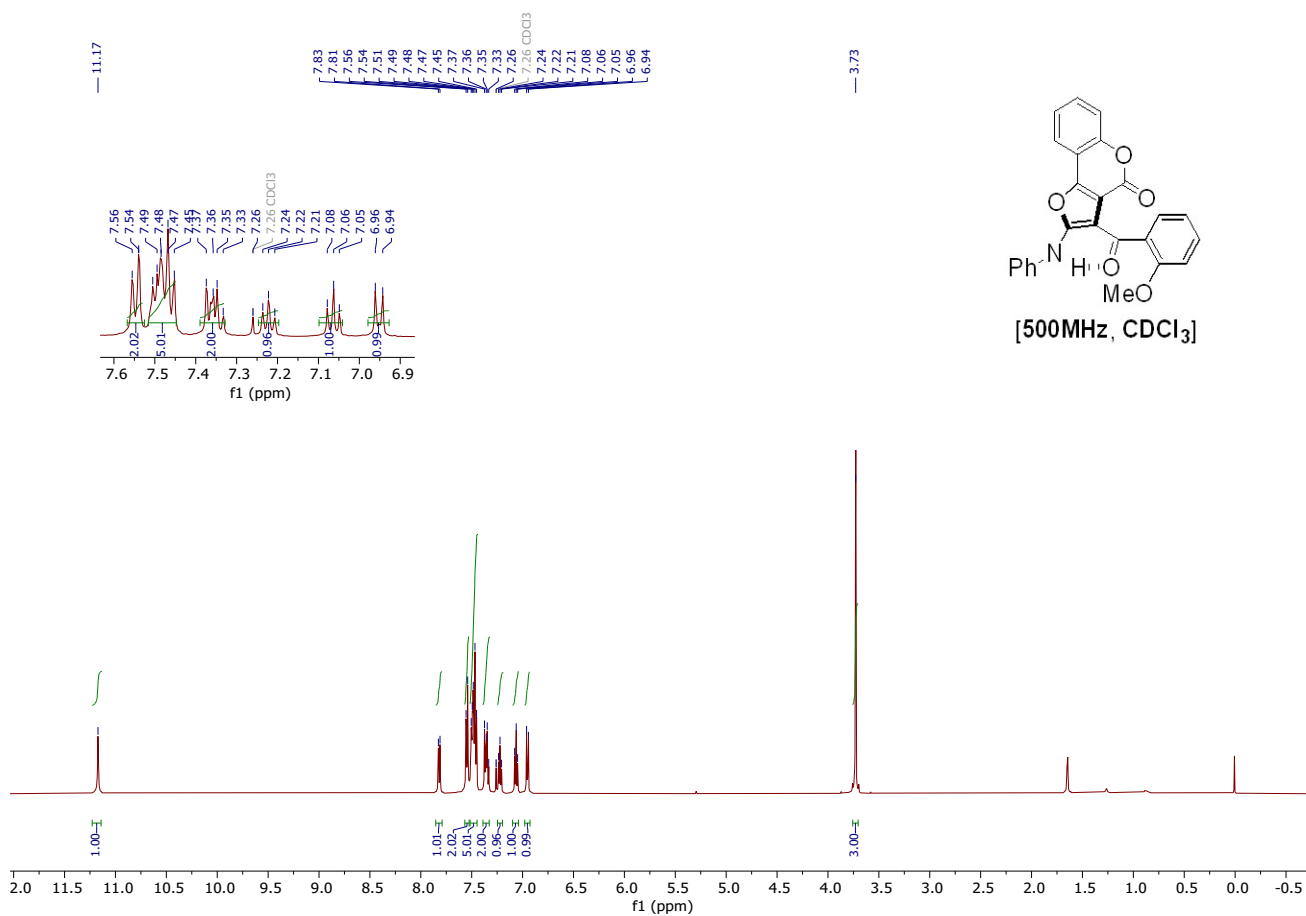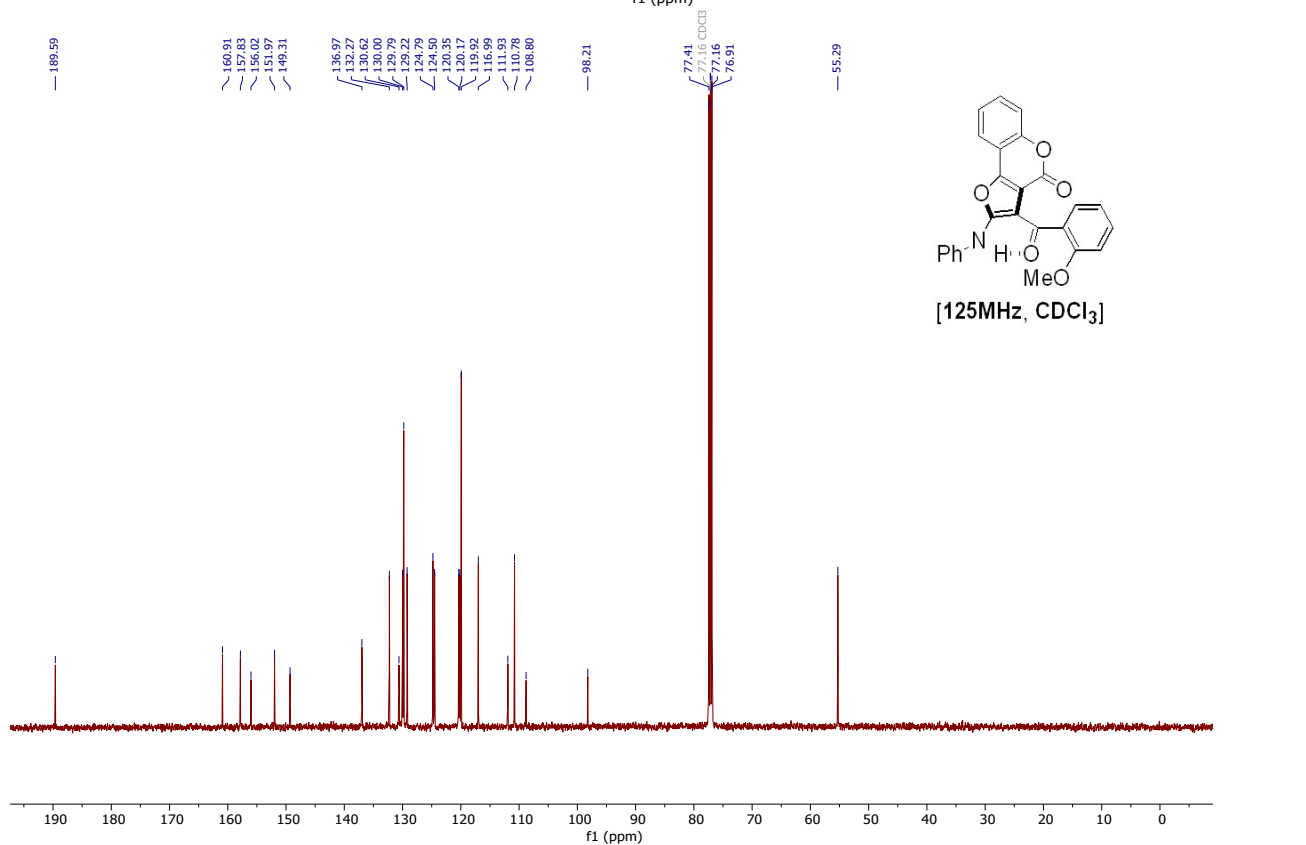

# $^1\text{H}$ and $^{13}\text{C}\{^1\text{H}\}$ NMR spectra of Compound 3f

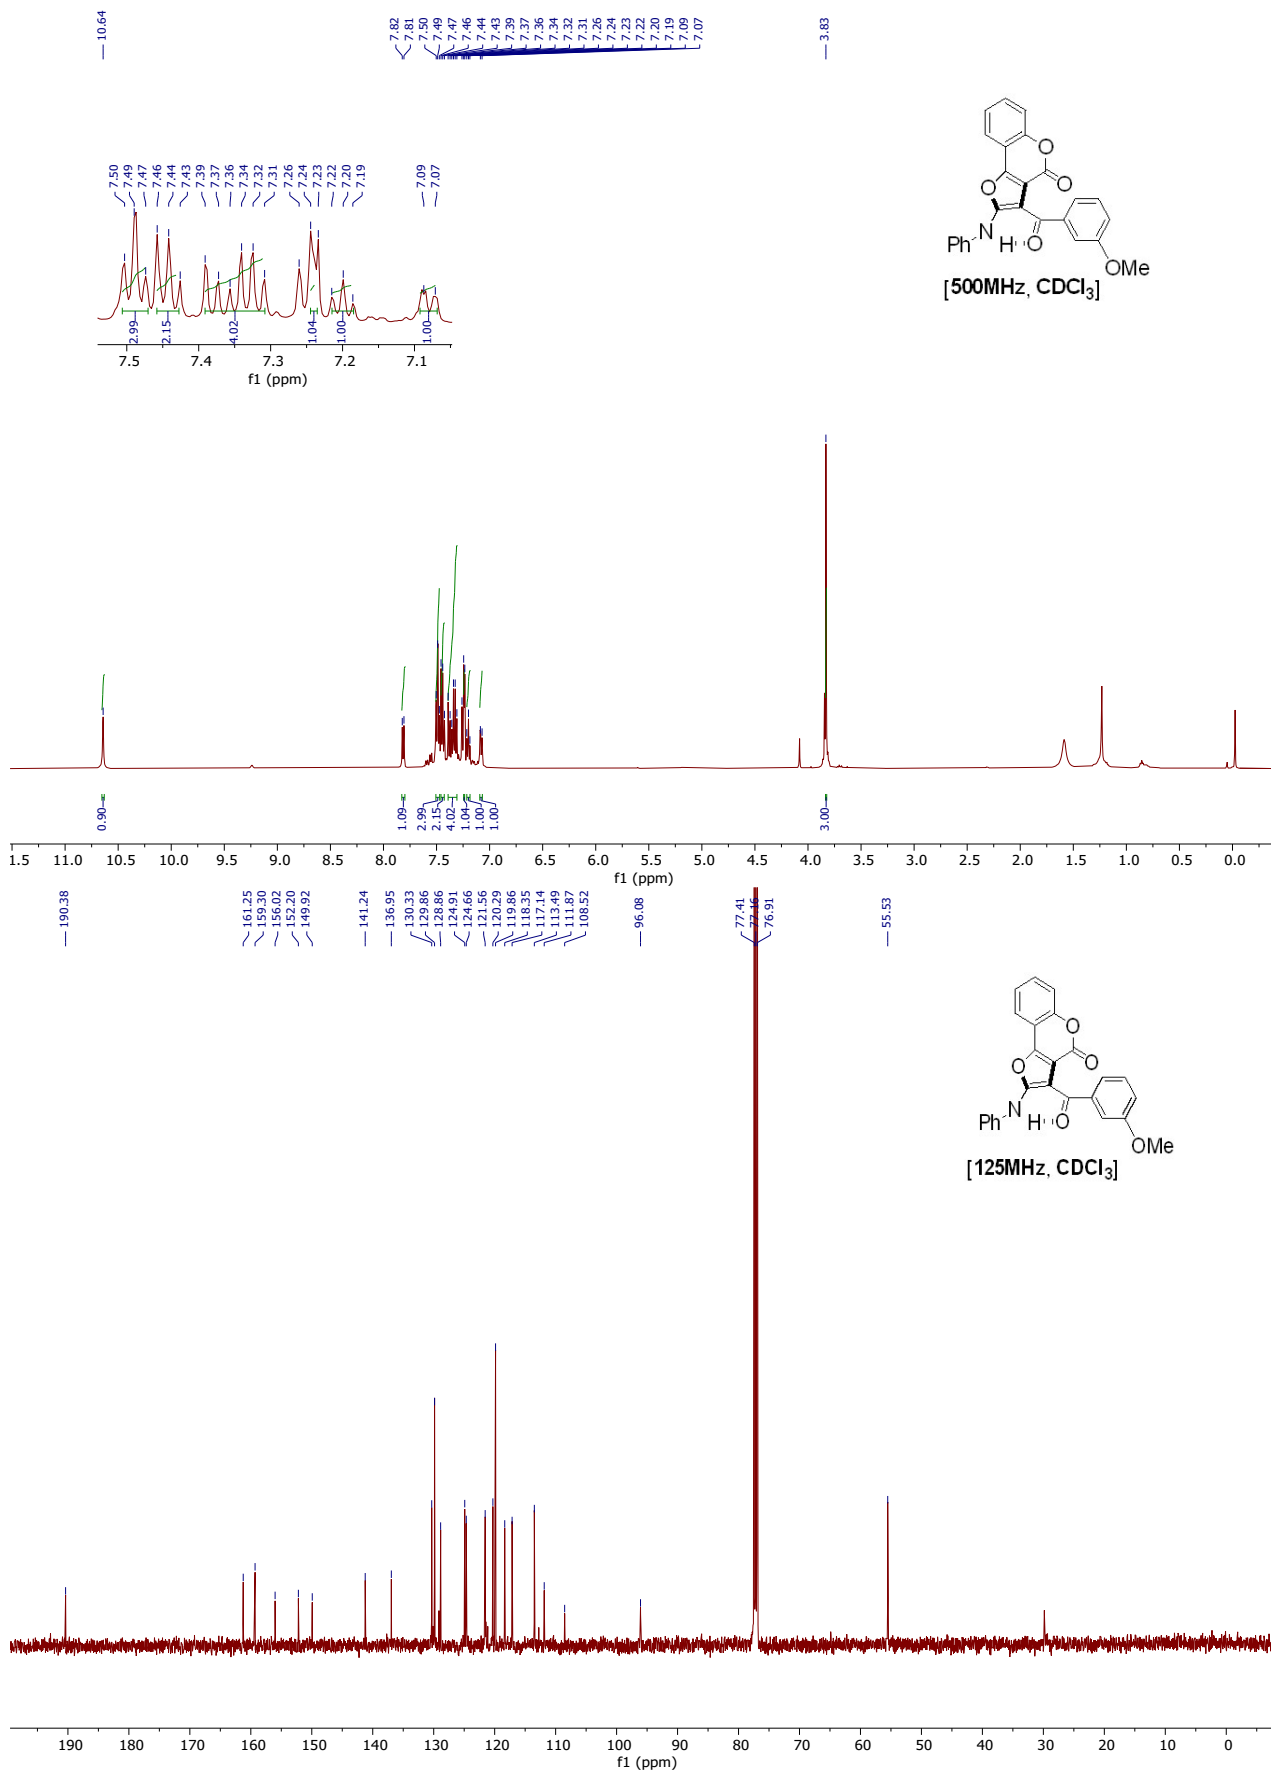

# $^1\text{H}$ and $^{13}\text{C}\{^1\text{H}\}$ NMR spectra of Compound 3g

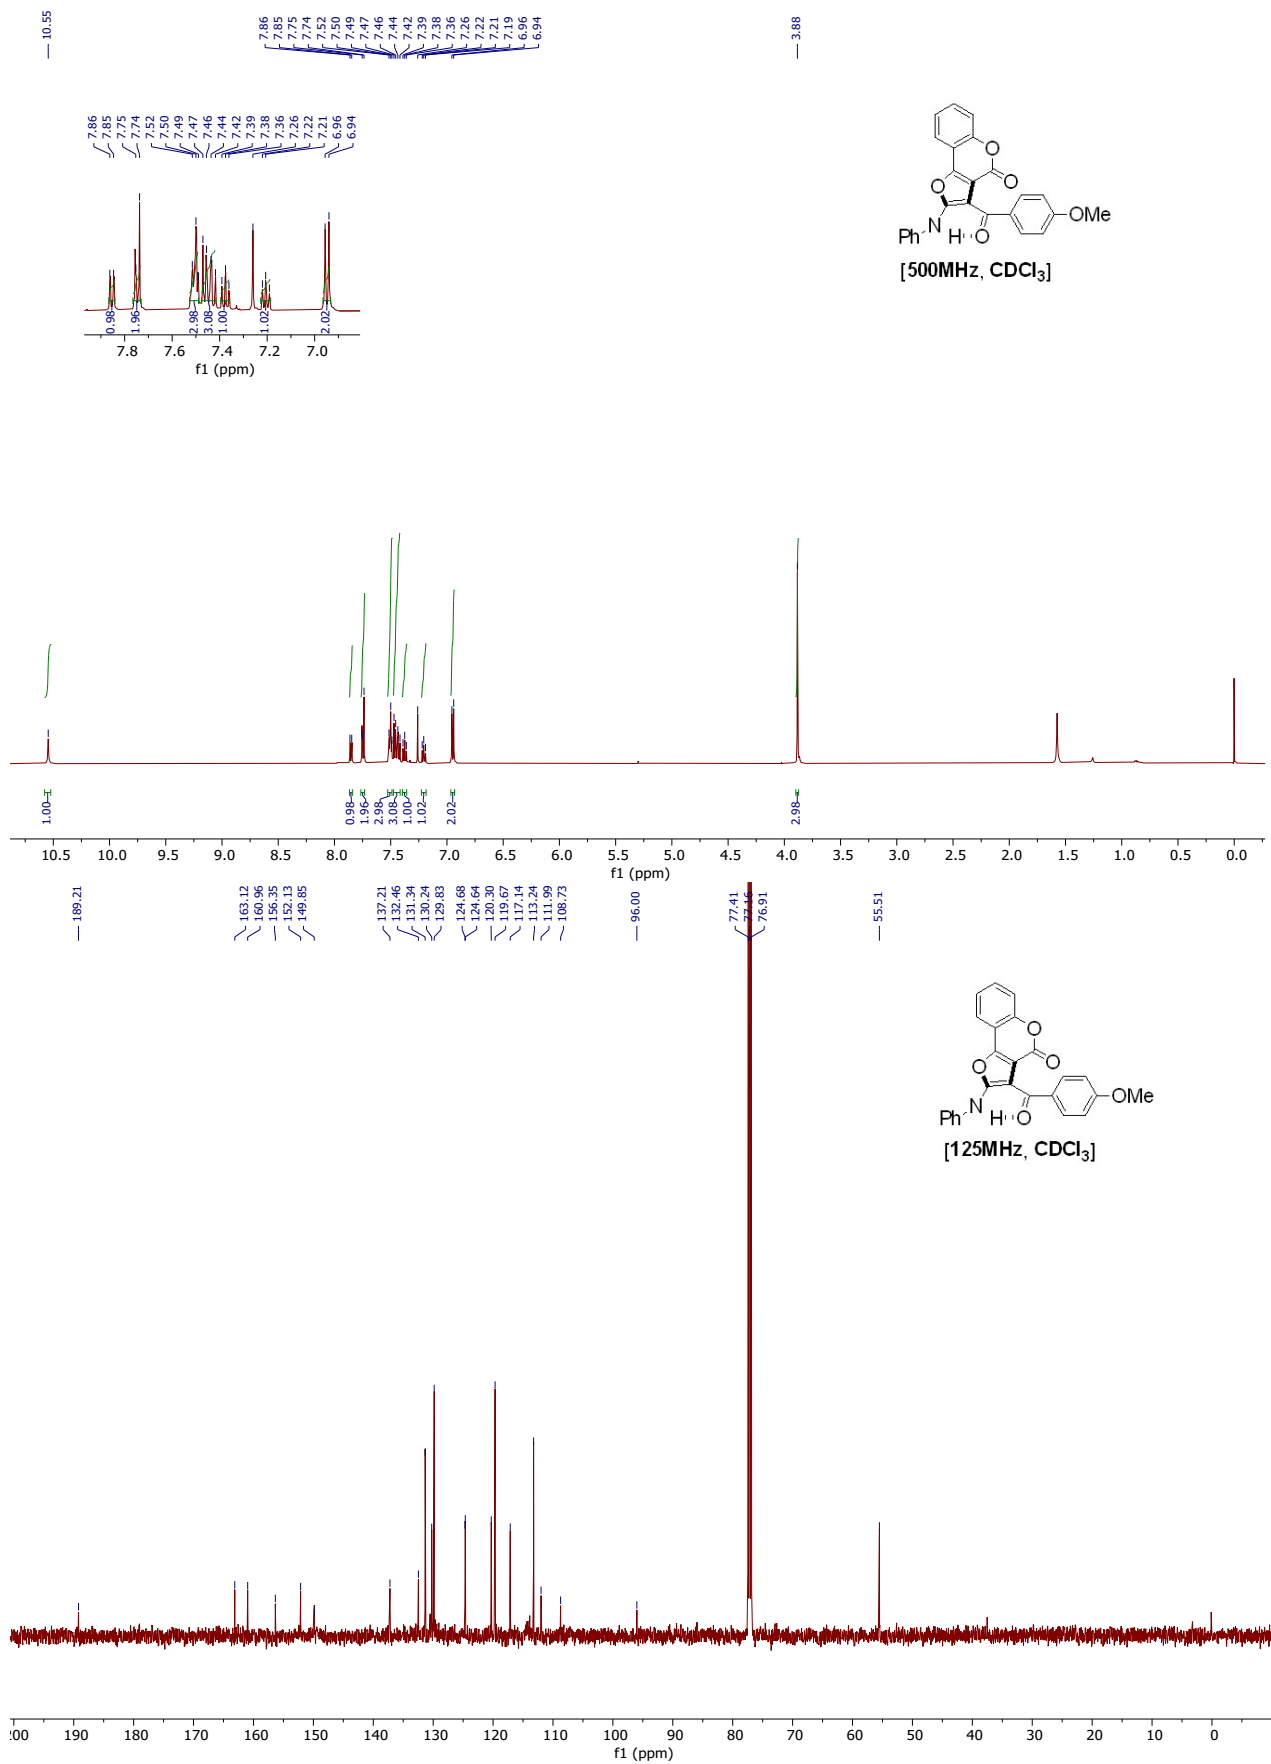

# $^1\text{H}$ and $^{13}\text{C}\{^1\text{H}\}$ NMR spectra of Compound 3h

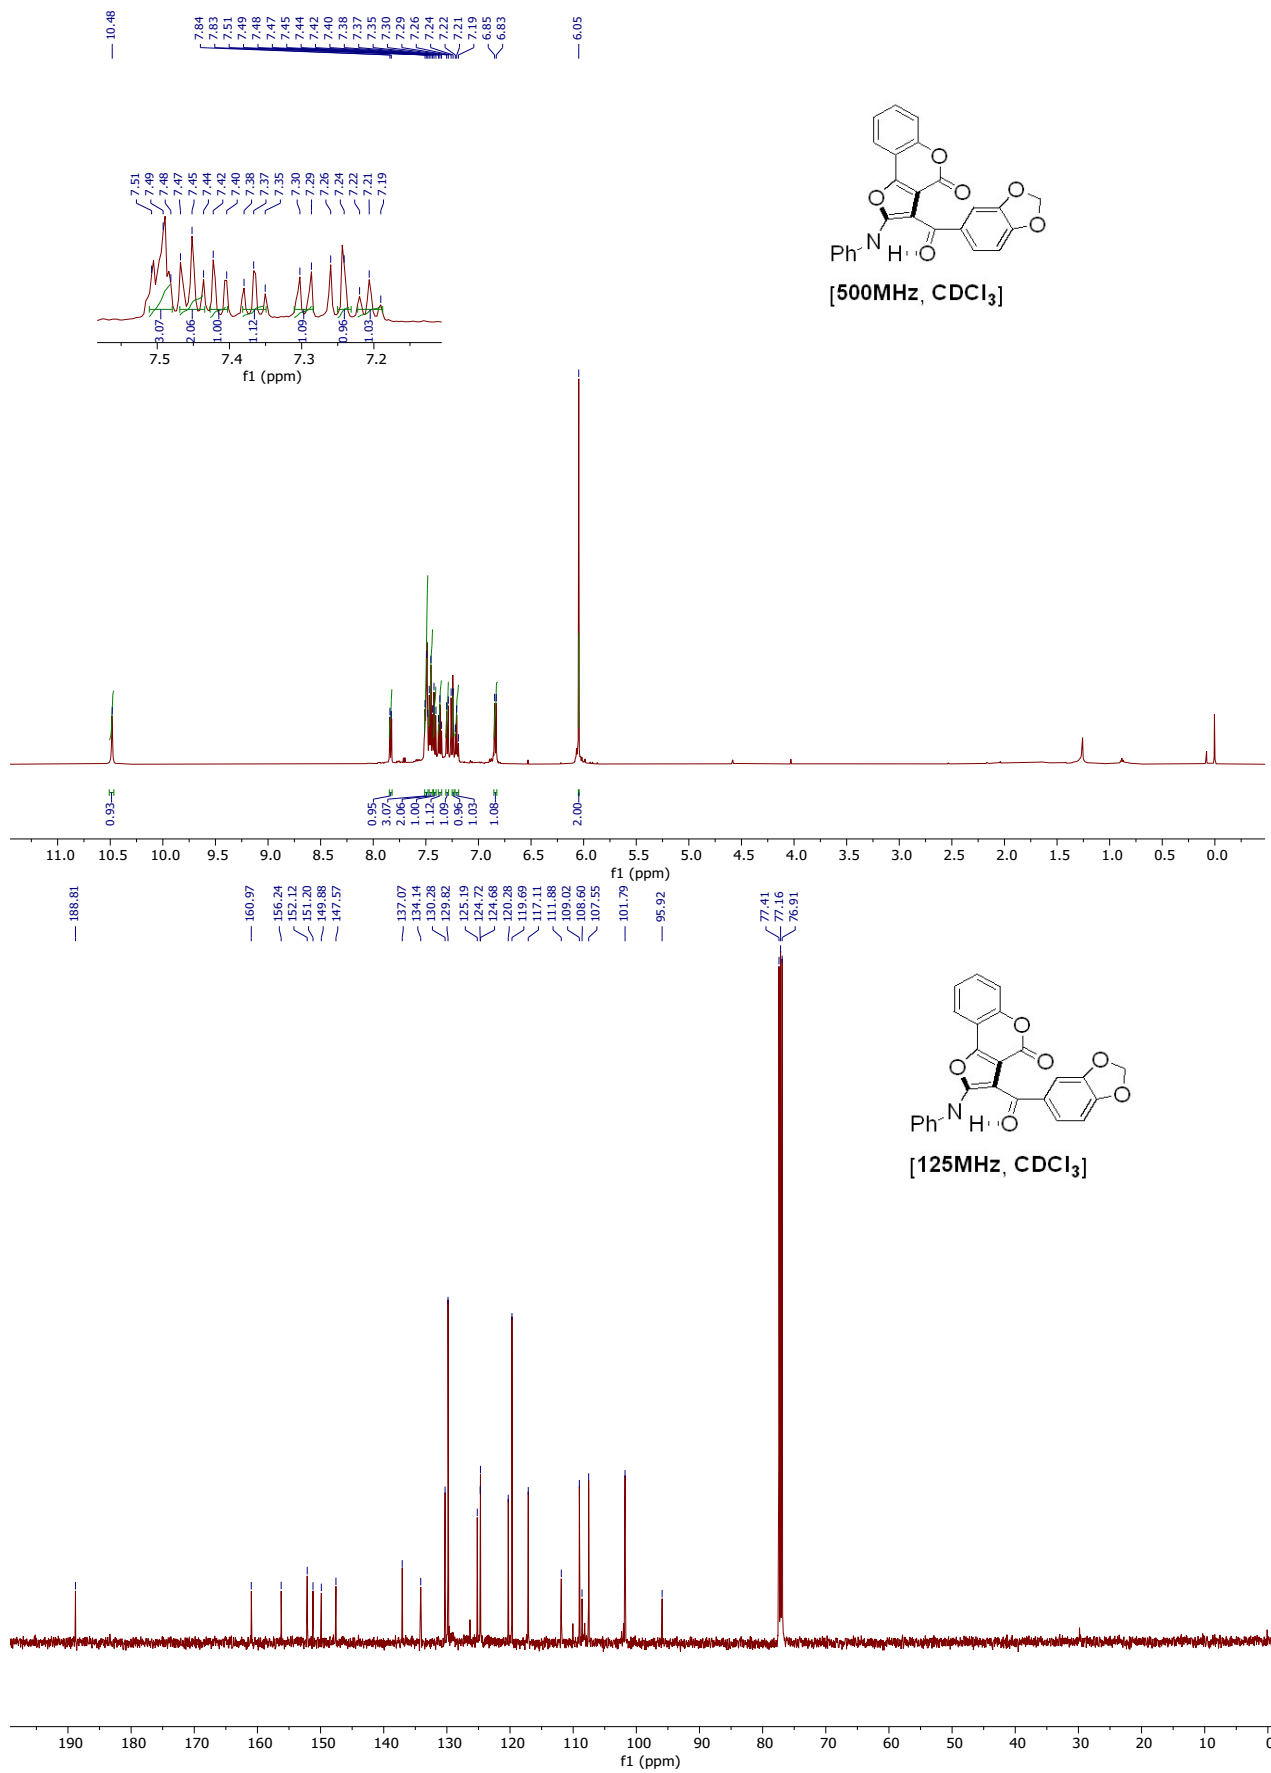

# $^1\text{H}$ and $^{13}\text{C}\{^1\text{H}\}$ NMR spectra of Compound 3i

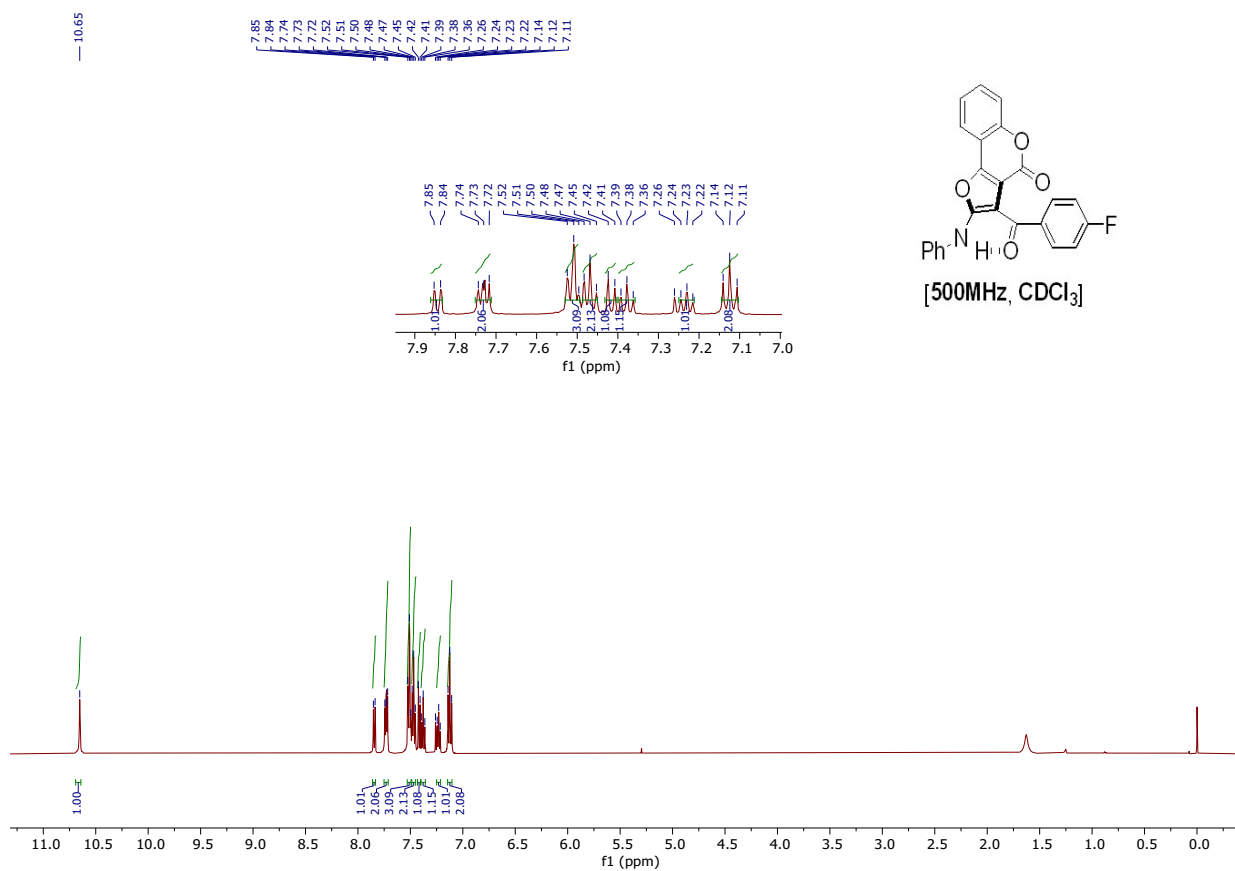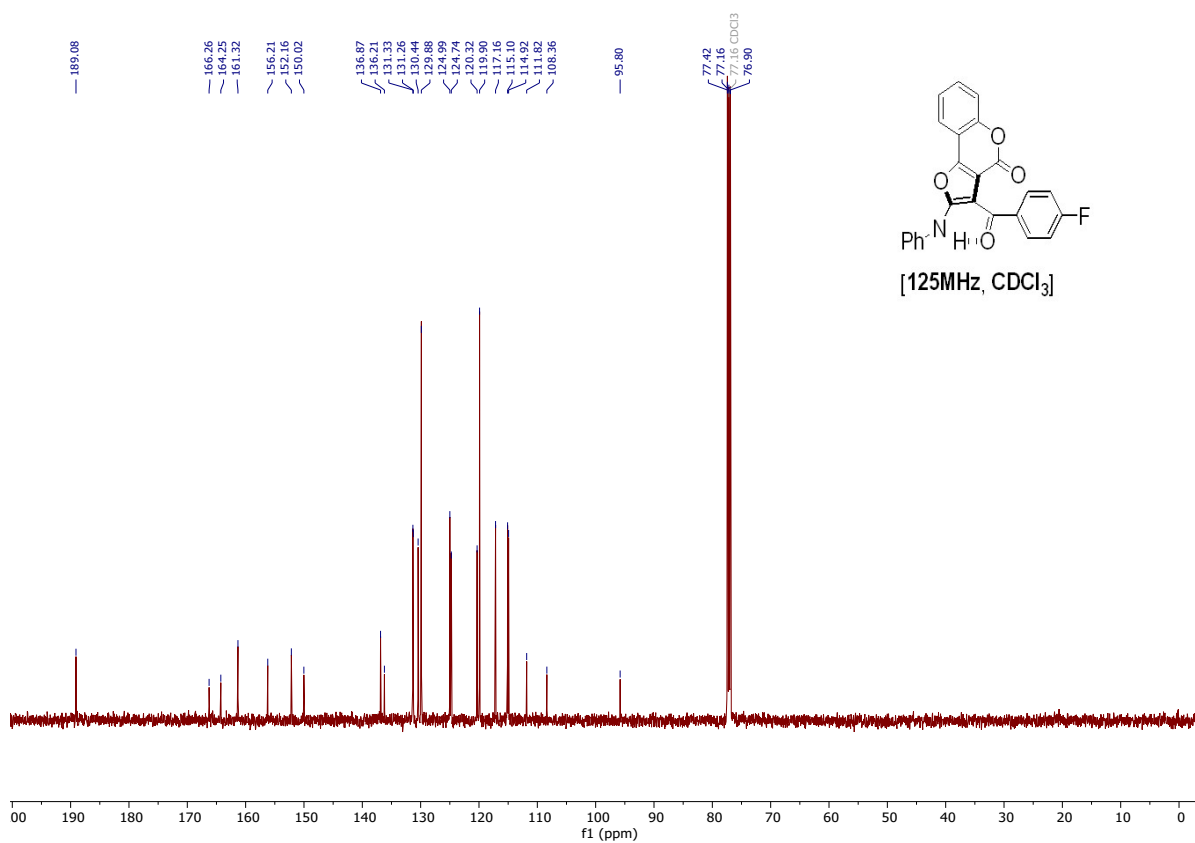

# $^1\text{H}$ and $^{13}\text{C}\{^1\text{H}\}$ NMR spectra of Compound 3j

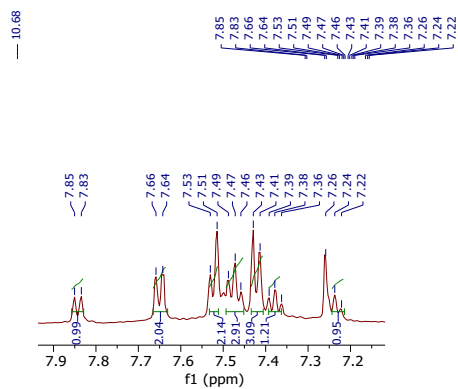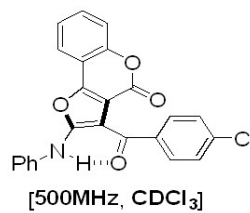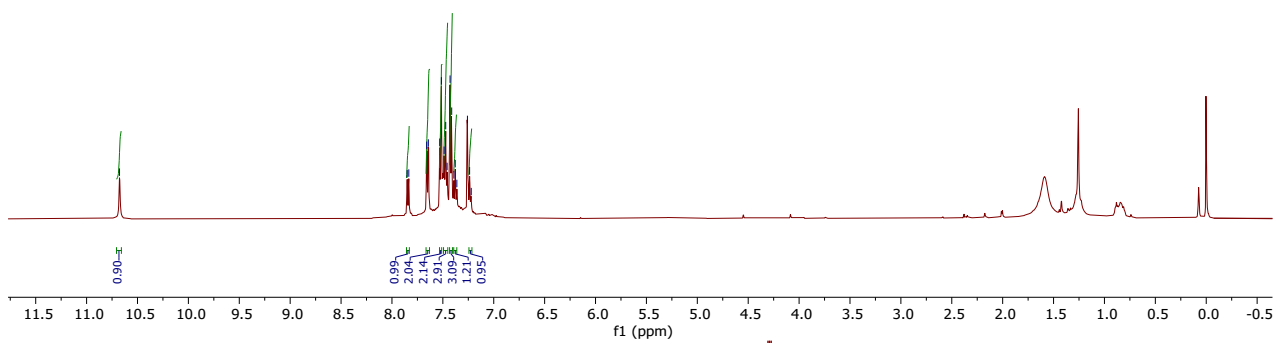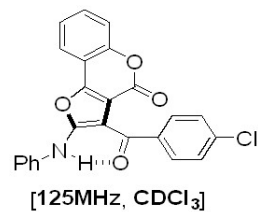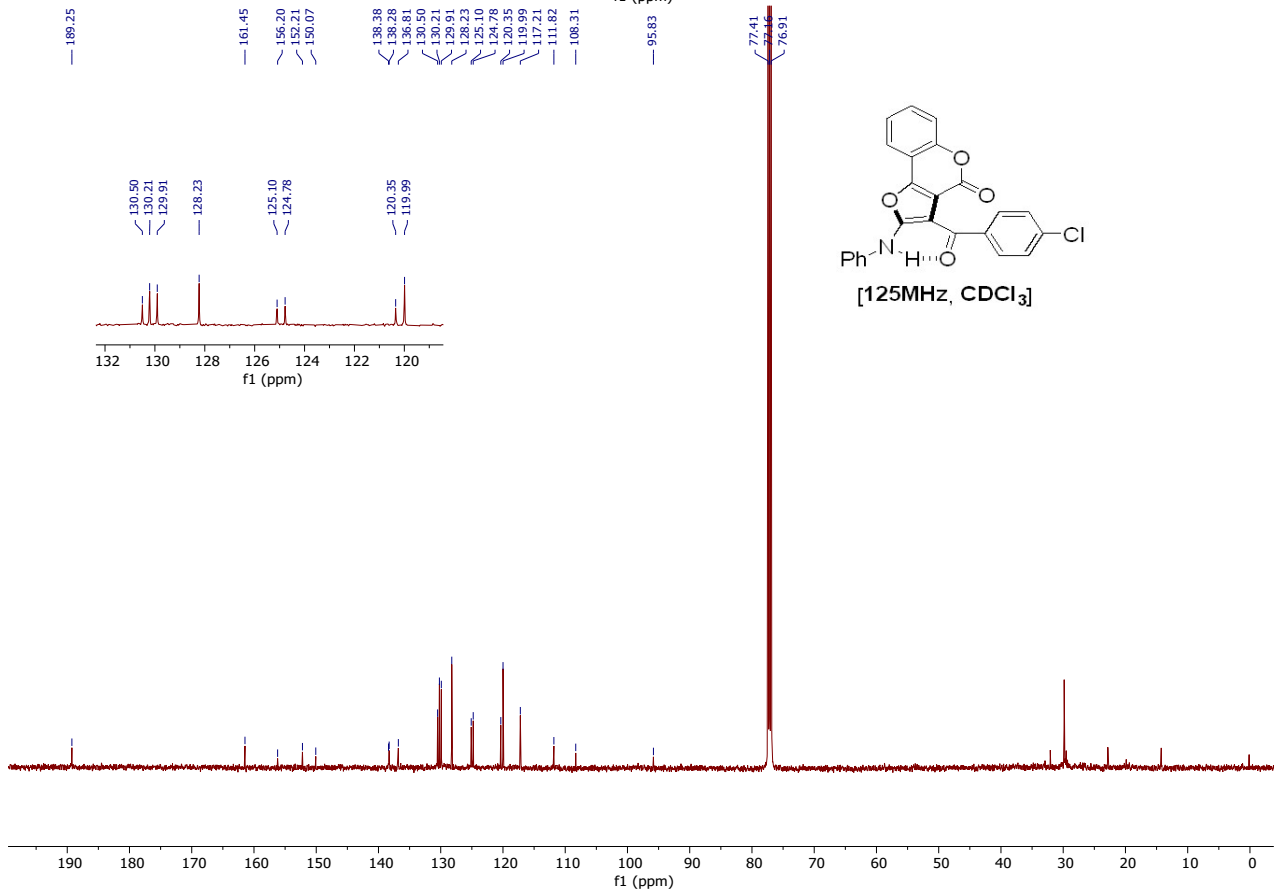



# $^1\text{H}$ and $^{13}\text{C}\{^1\text{H}\}$ NMR spectra of Compound 3k

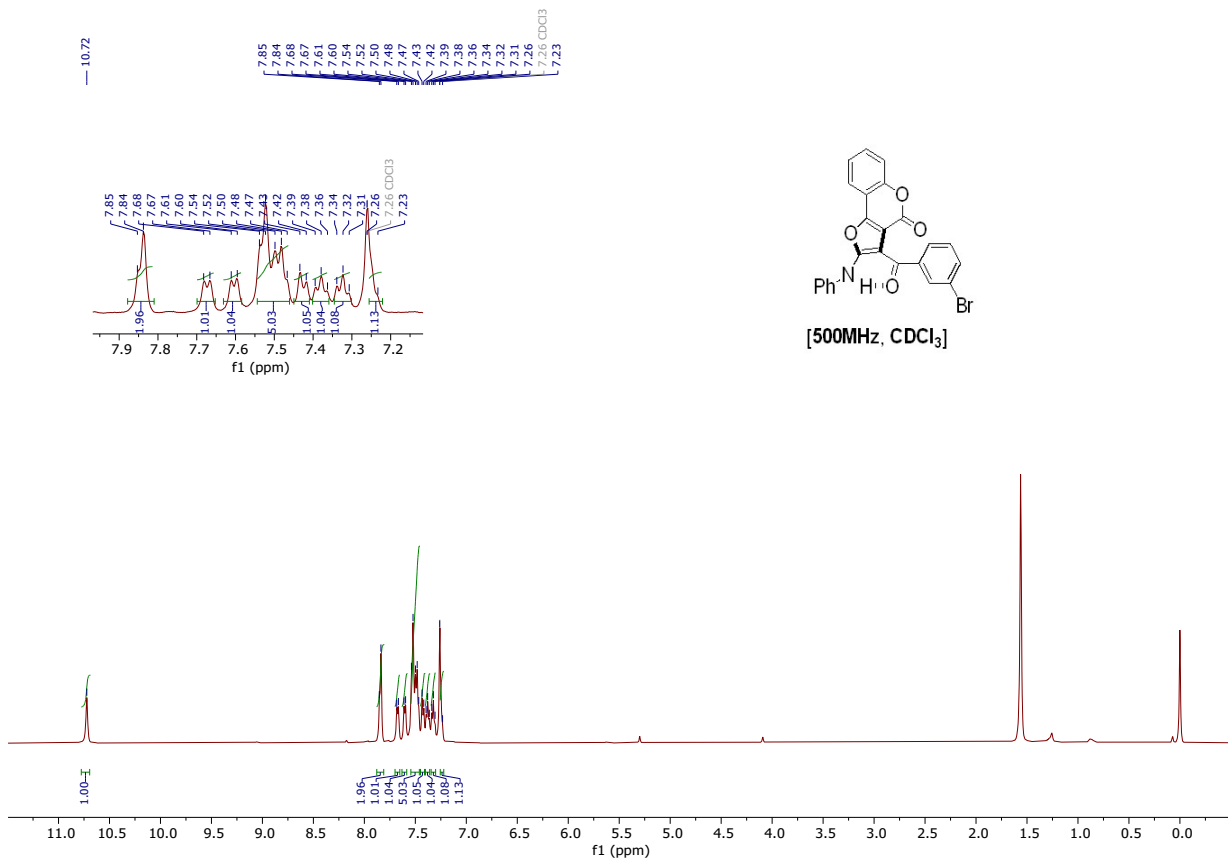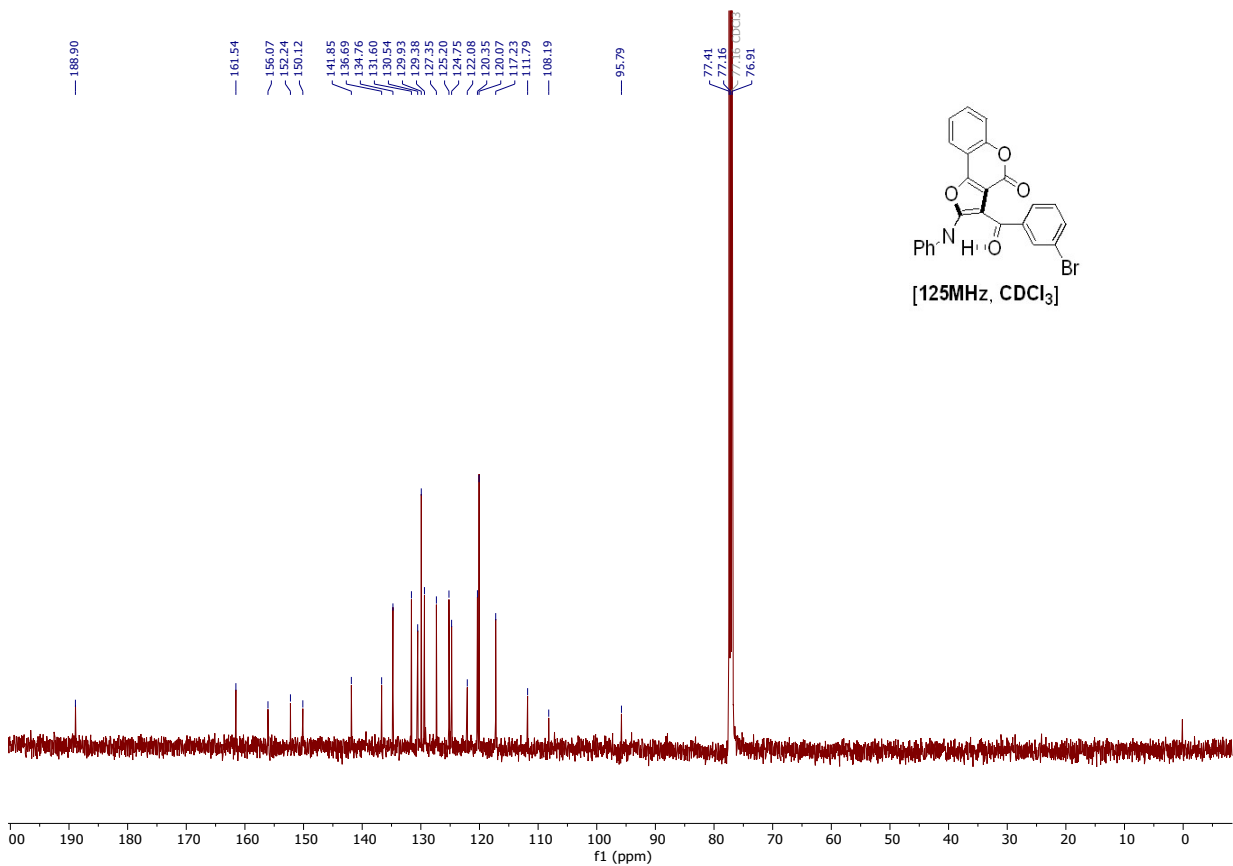

# $^1\text{H}$ and $^{13}\text{C}\{^1\text{H}\}$ NMR spectra of Compound 3I

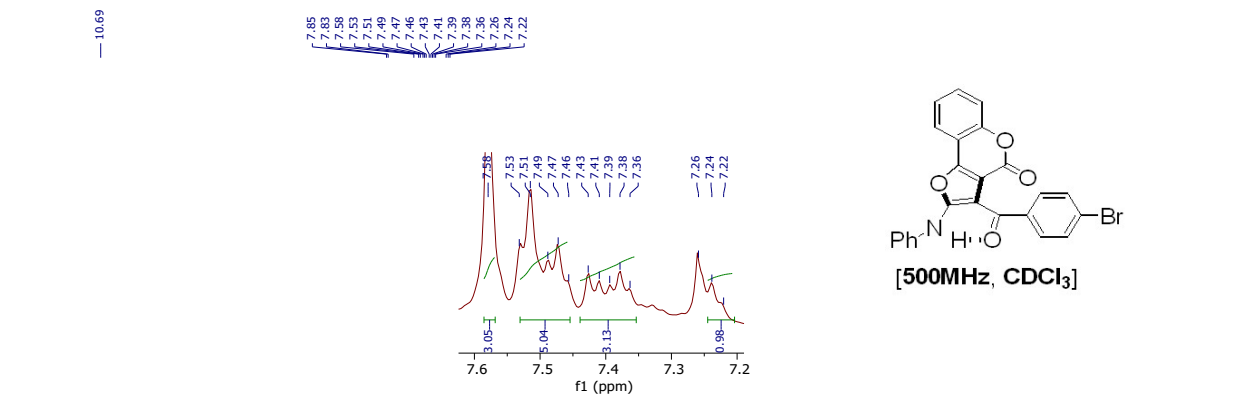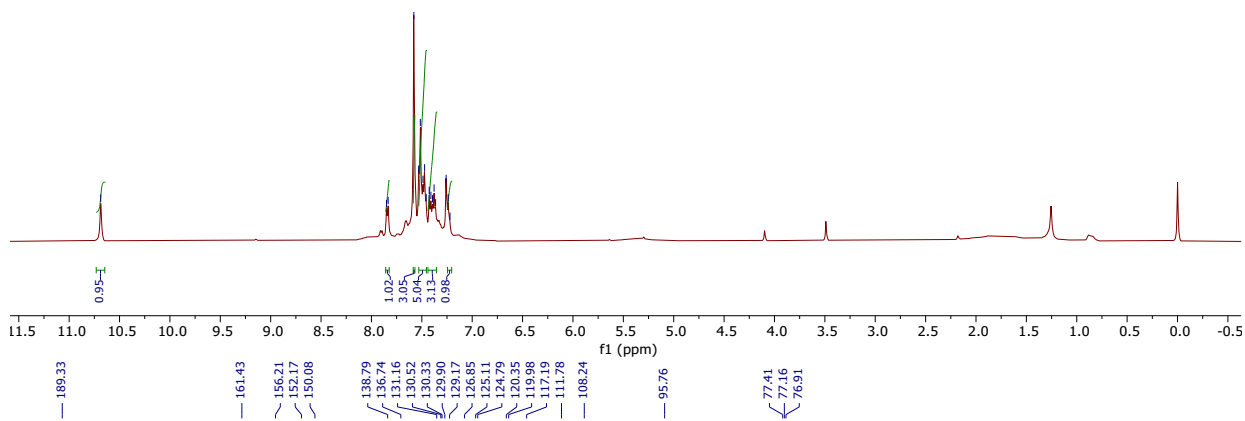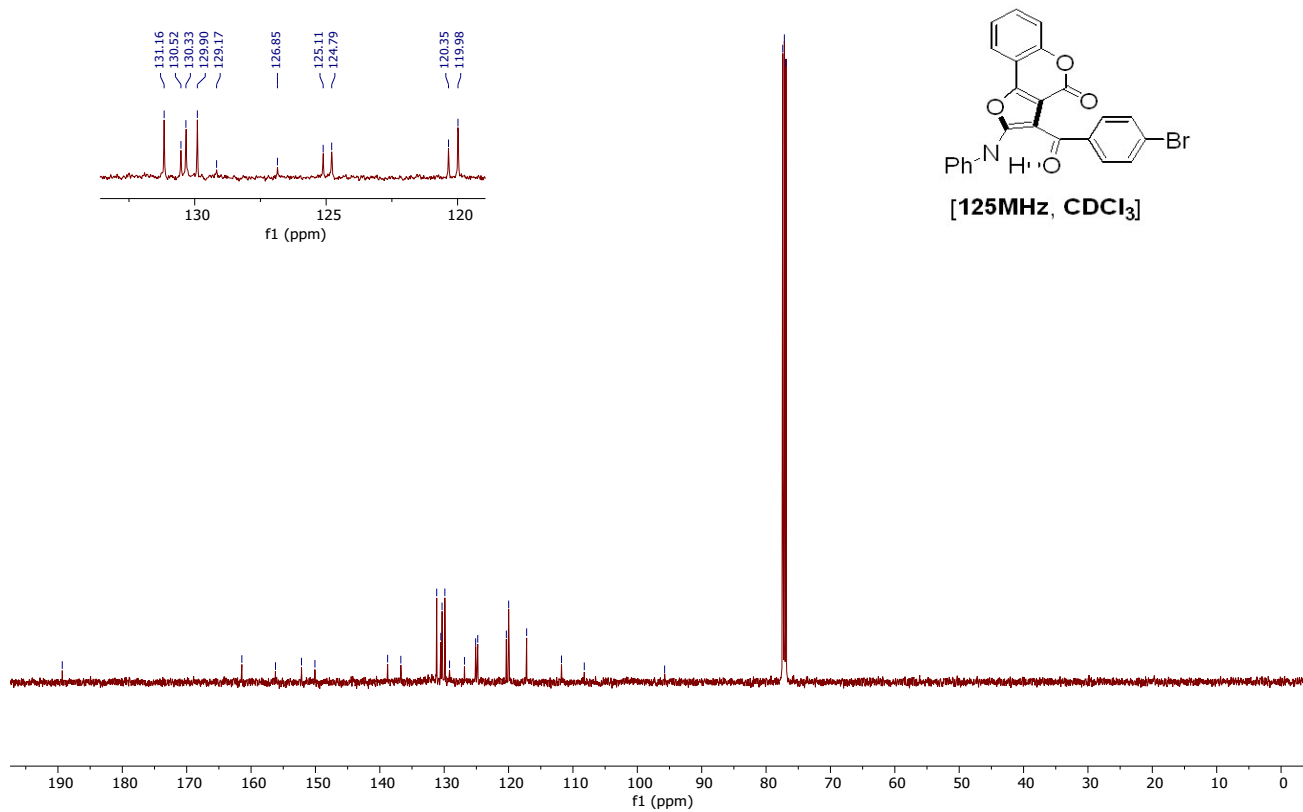

# $^1\text{H}$ and $^{13}\text{C}\{^1\text{H}\}$ NMR spectra of Compound 3m

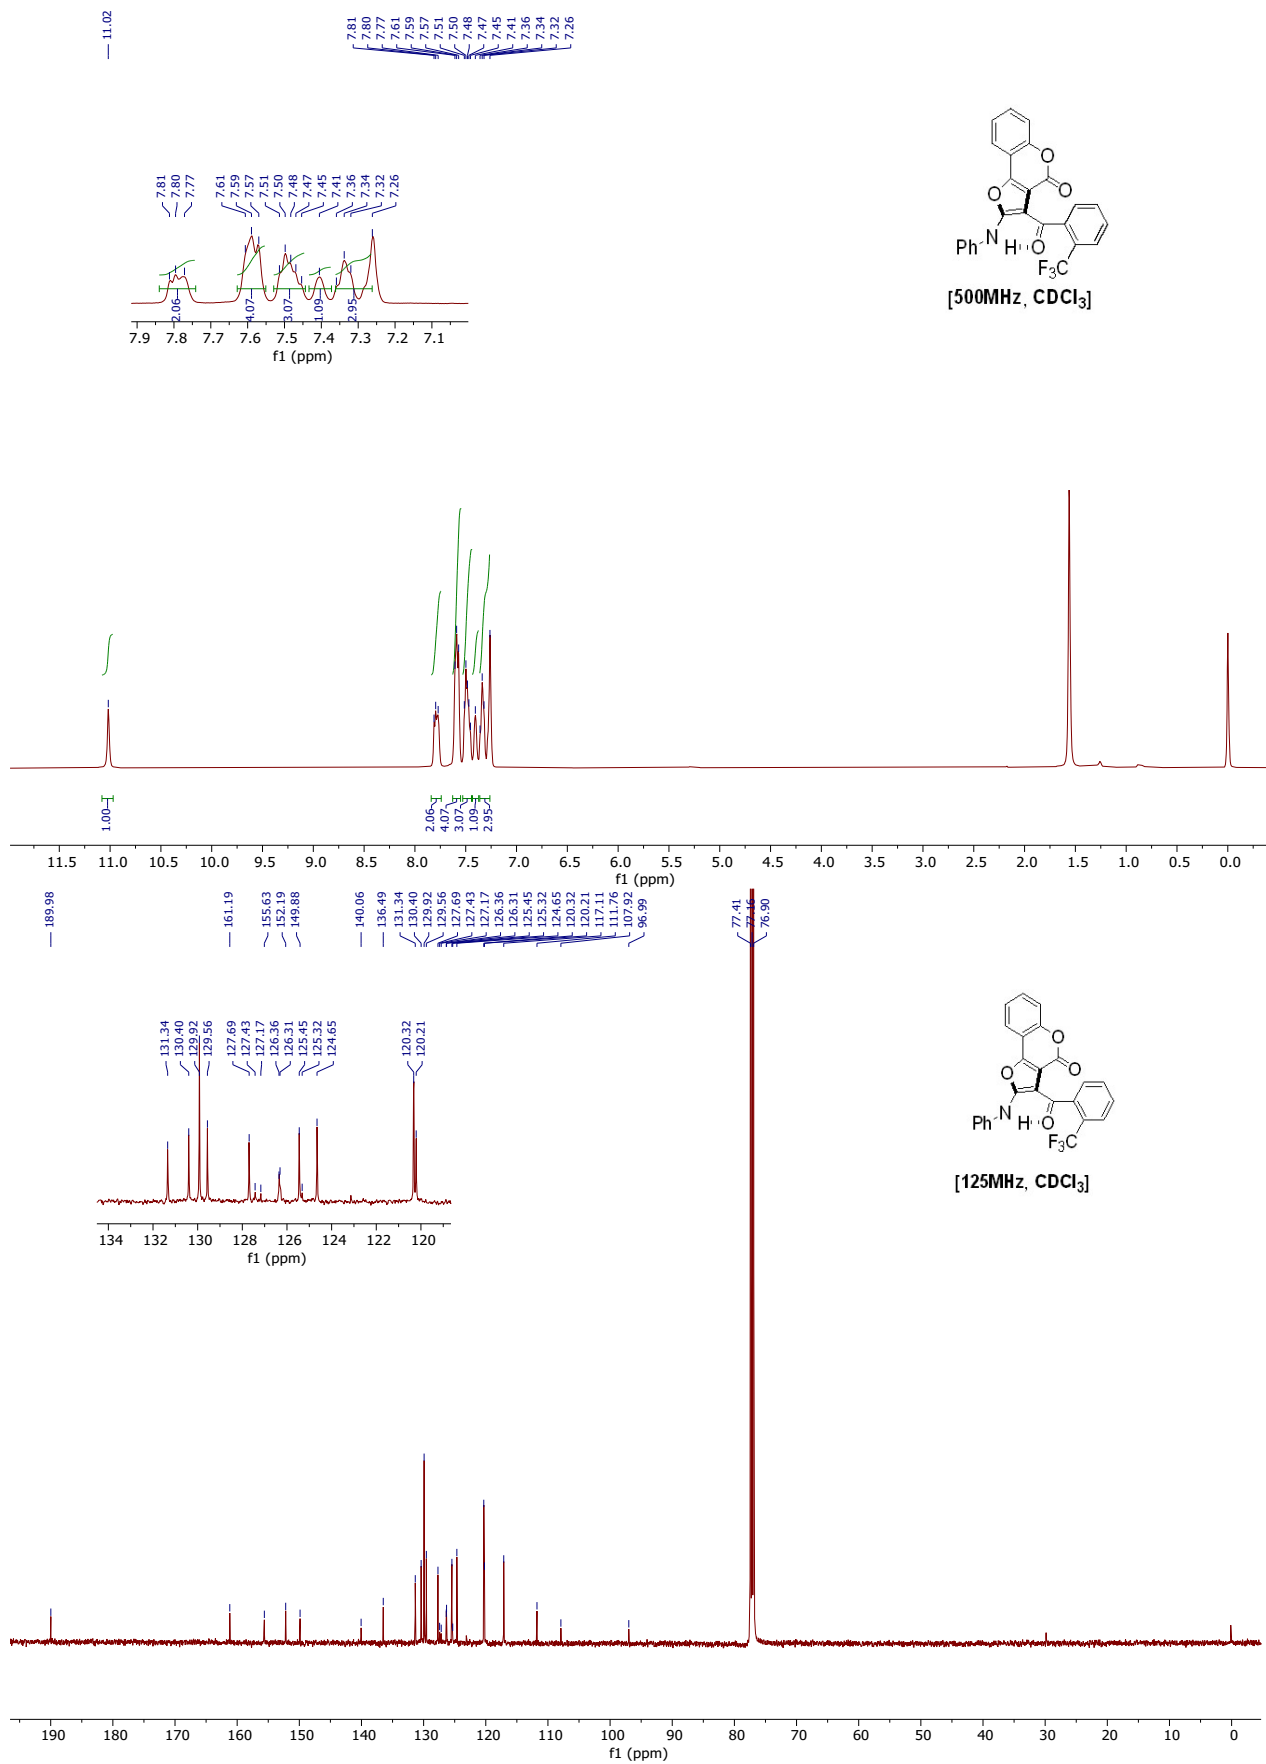

# $^1\text{H}$ and $^{13}\text{C}\{^1\text{H}\}$ NMR spectra of Compound 3n

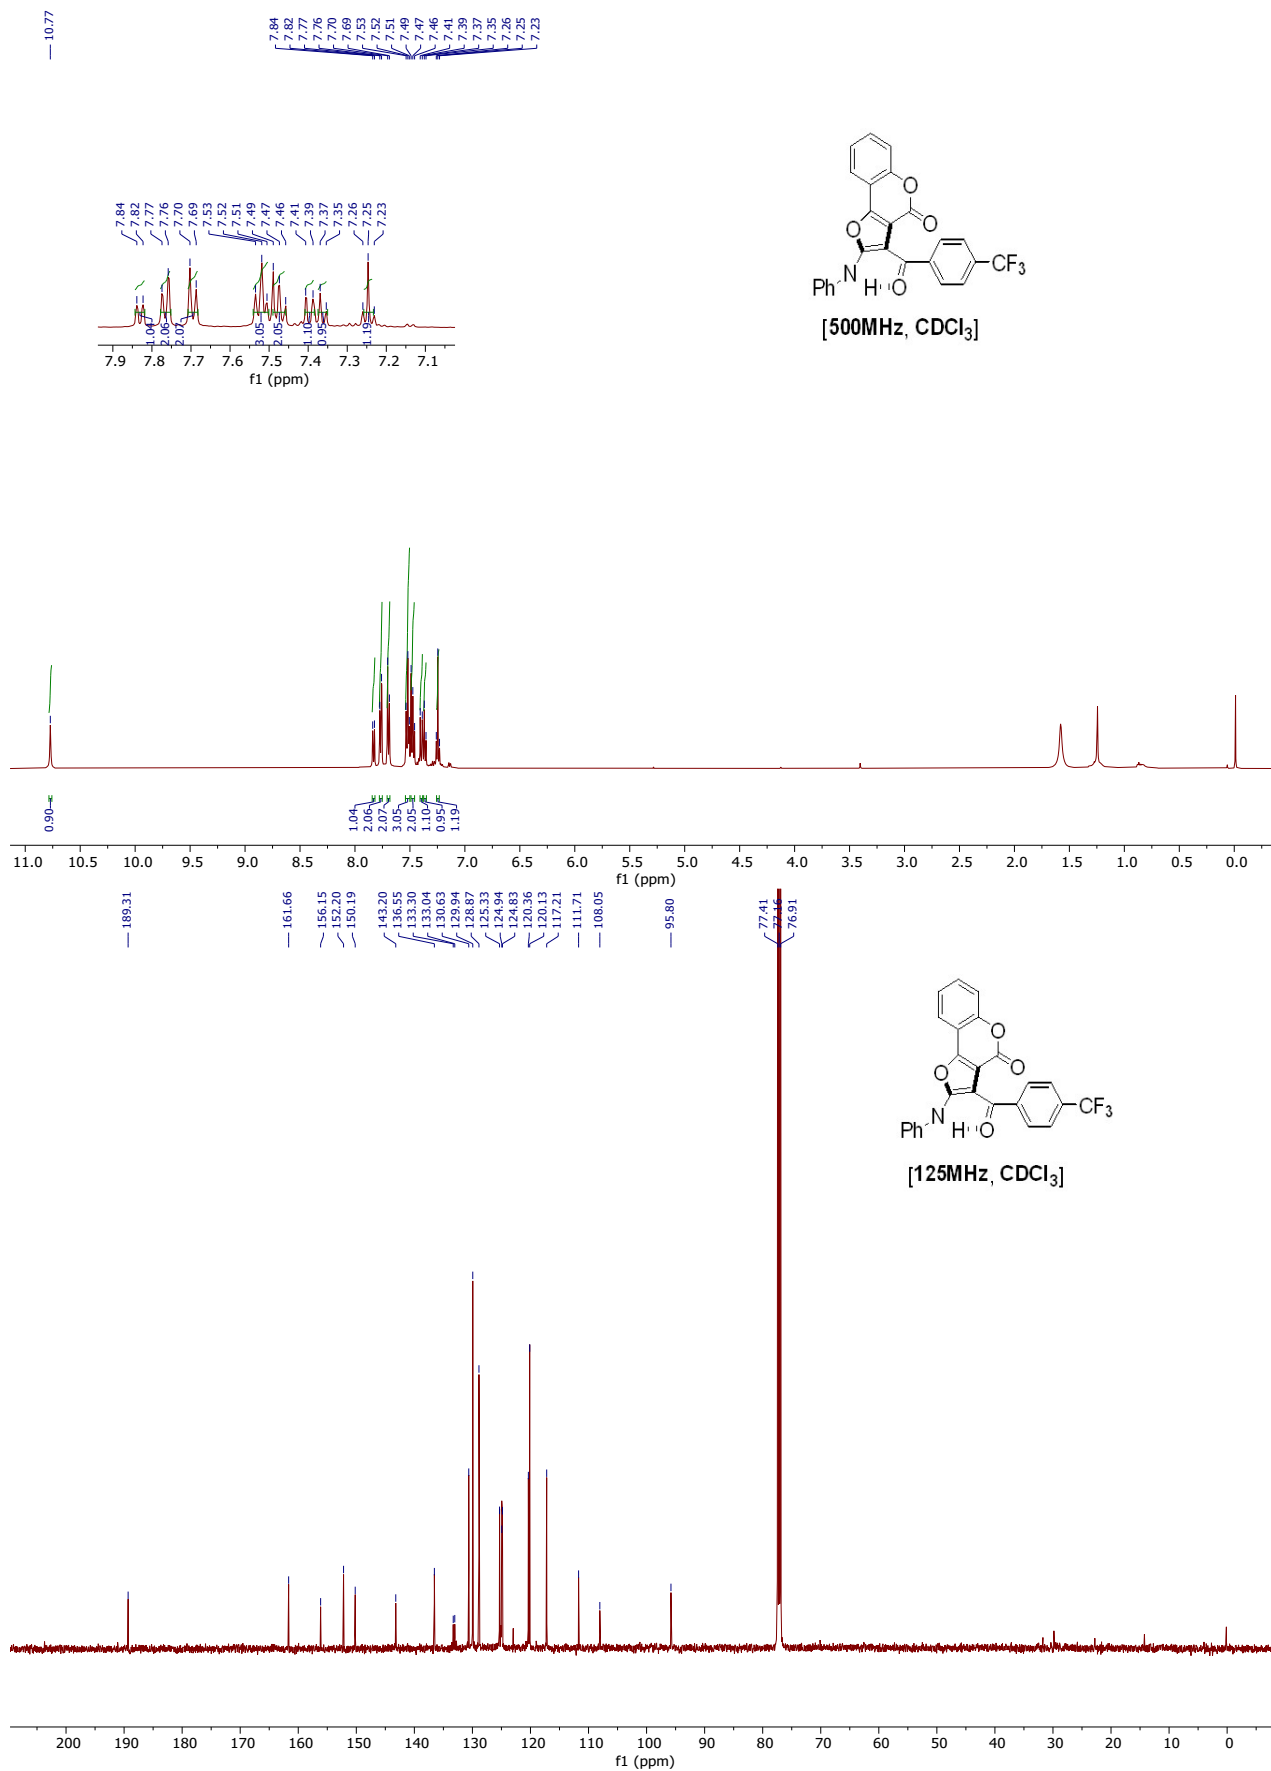

# $^1\text{H}$ and $^{13}\text{C}\{^1\text{H}\}$ NMR spectra of Compound 3o

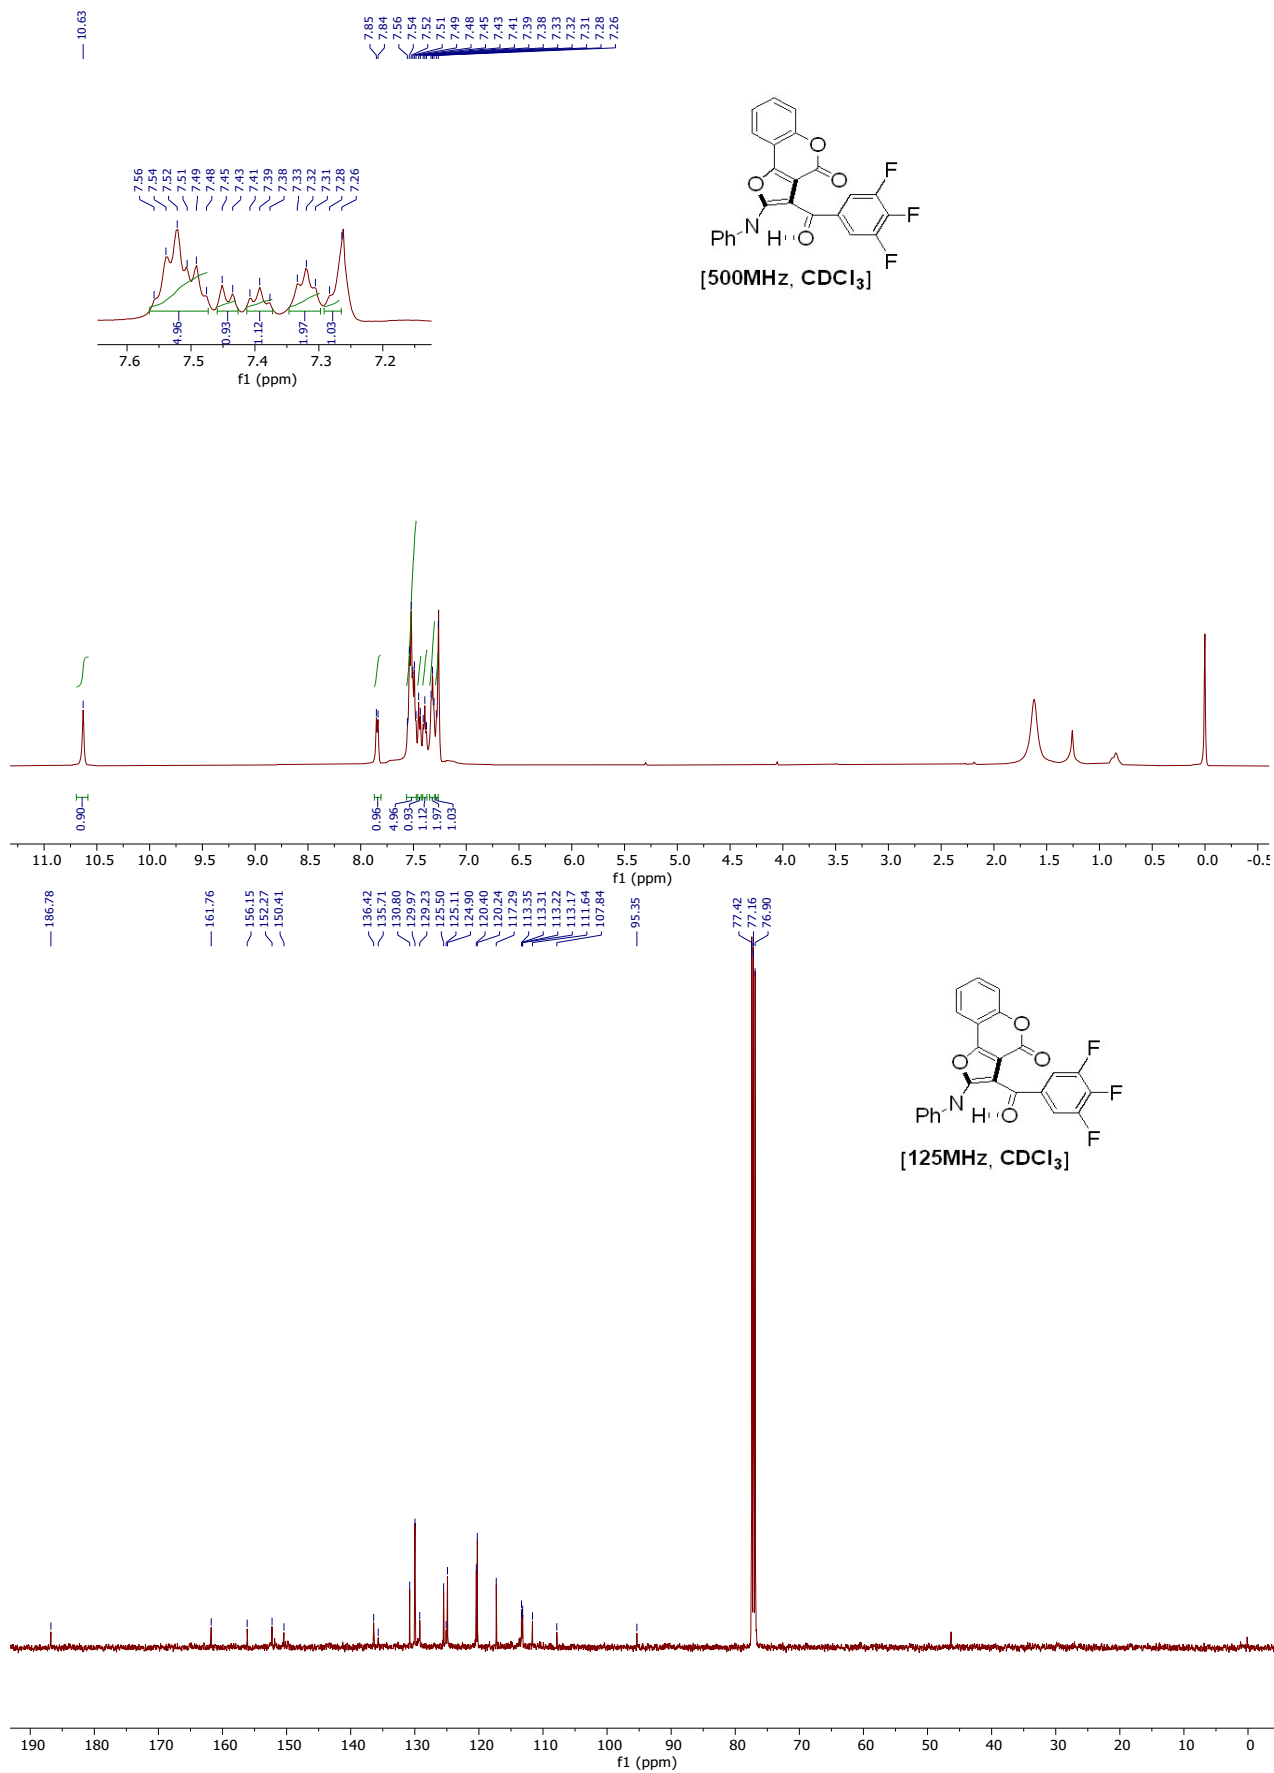

# $^1\text{H}$ and $^{13}\text{C}\{^1\text{H}\}$ NMR spectra of Compound 3p

10.86  
8.93  
8.78  
8.77  
8.12  
7.90  
7.89  
7.82  
7.80  
7.53  
7.51  
7.49  
7.48  
7.40  
7.38  
7.36  
7.35  
7.29  
7.27  
7.26

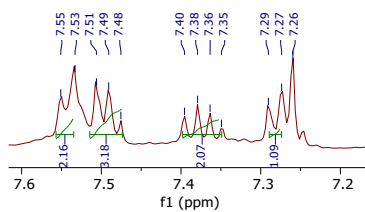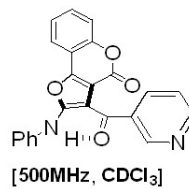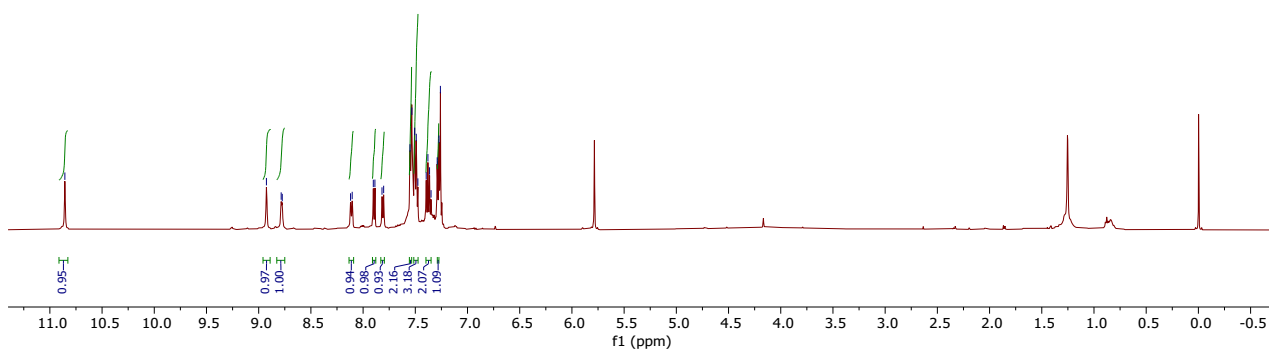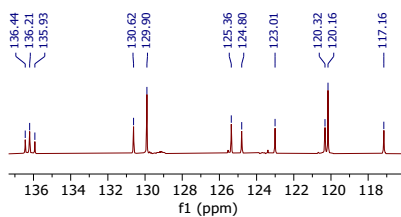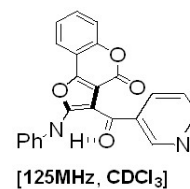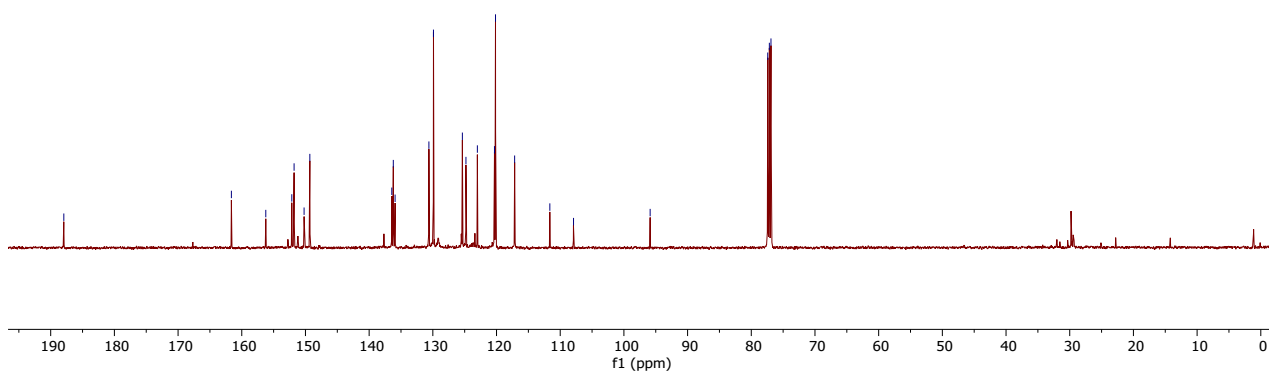

# $^1\text{H}$ and $^{13}\text{C}\{^1\text{H}\}$ NMR spectra of Compound 3q

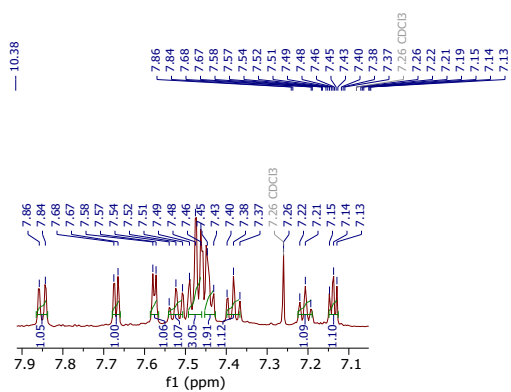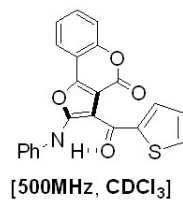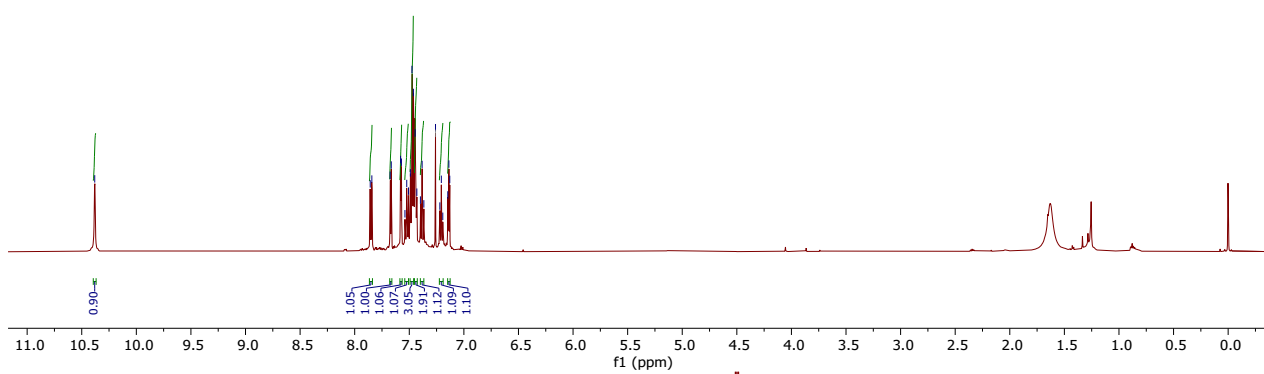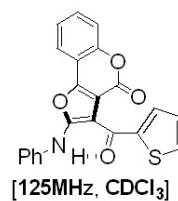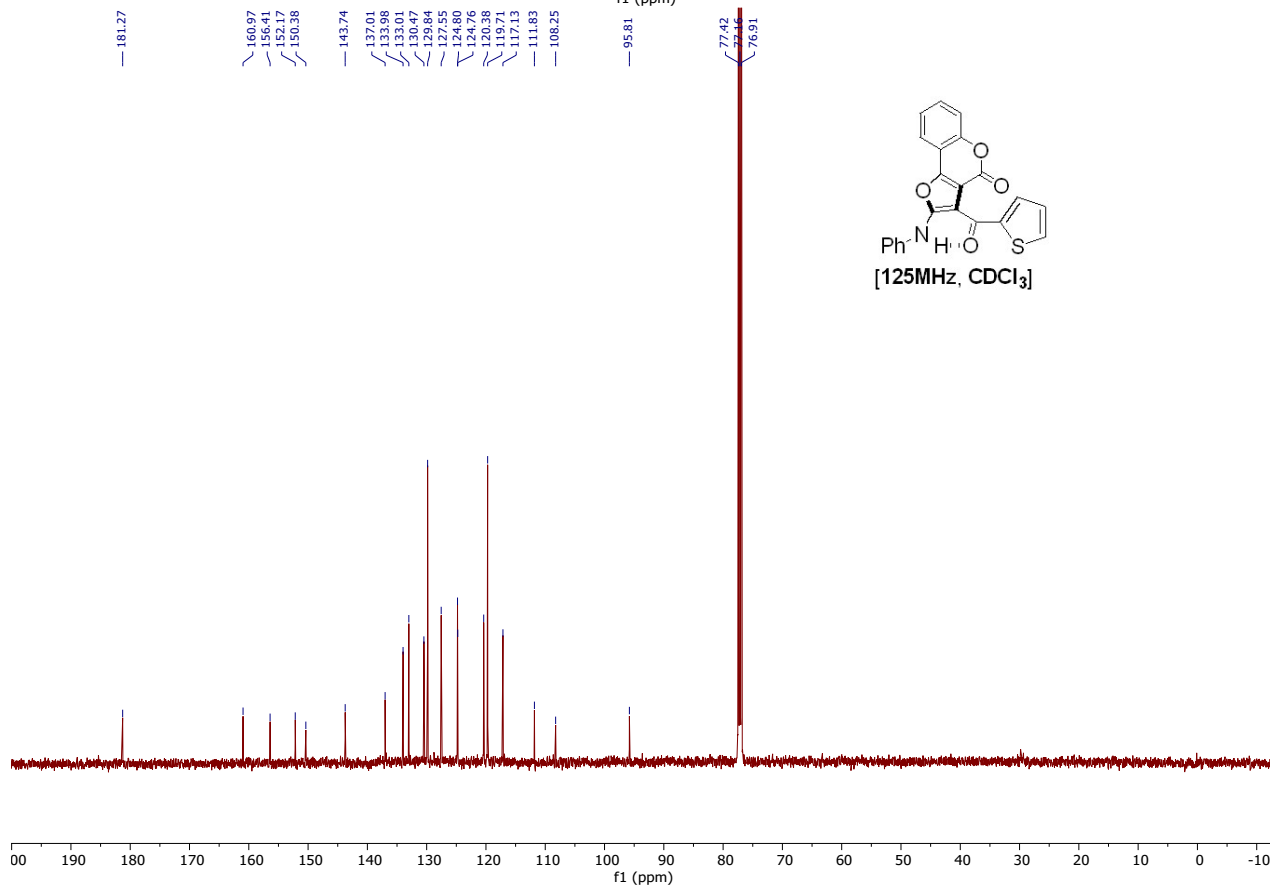

# <sup>1</sup>H and <sup>13</sup>C{<sup>1</sup>H} NMR spectra of Compound 3r

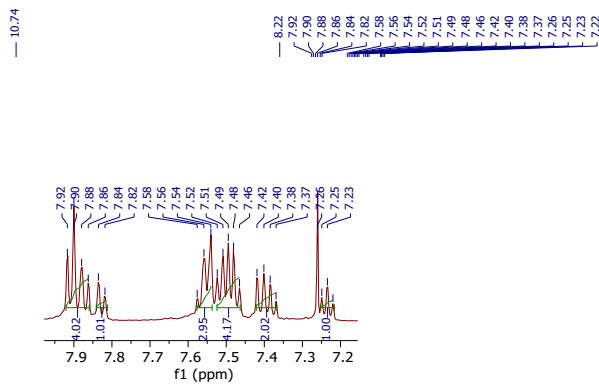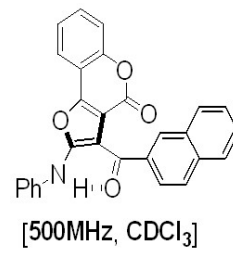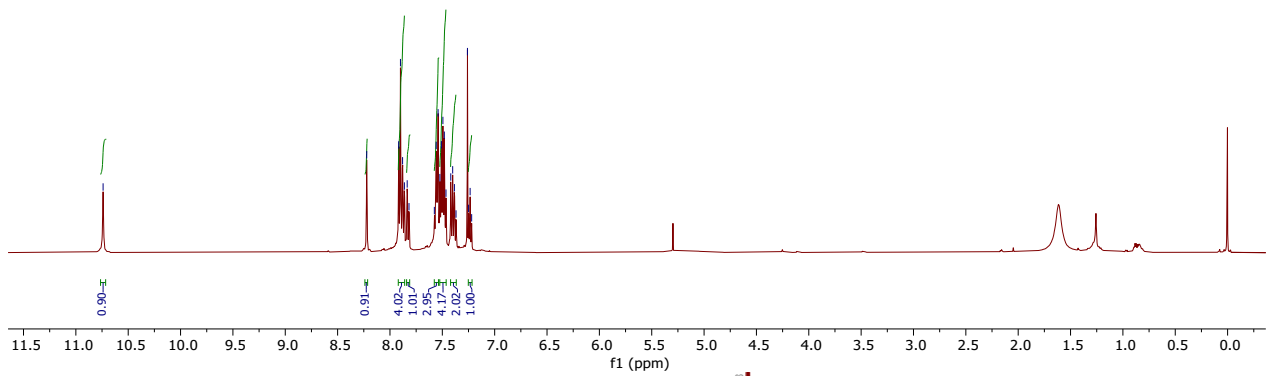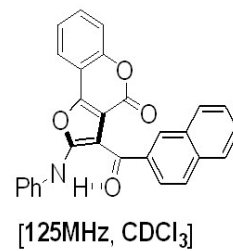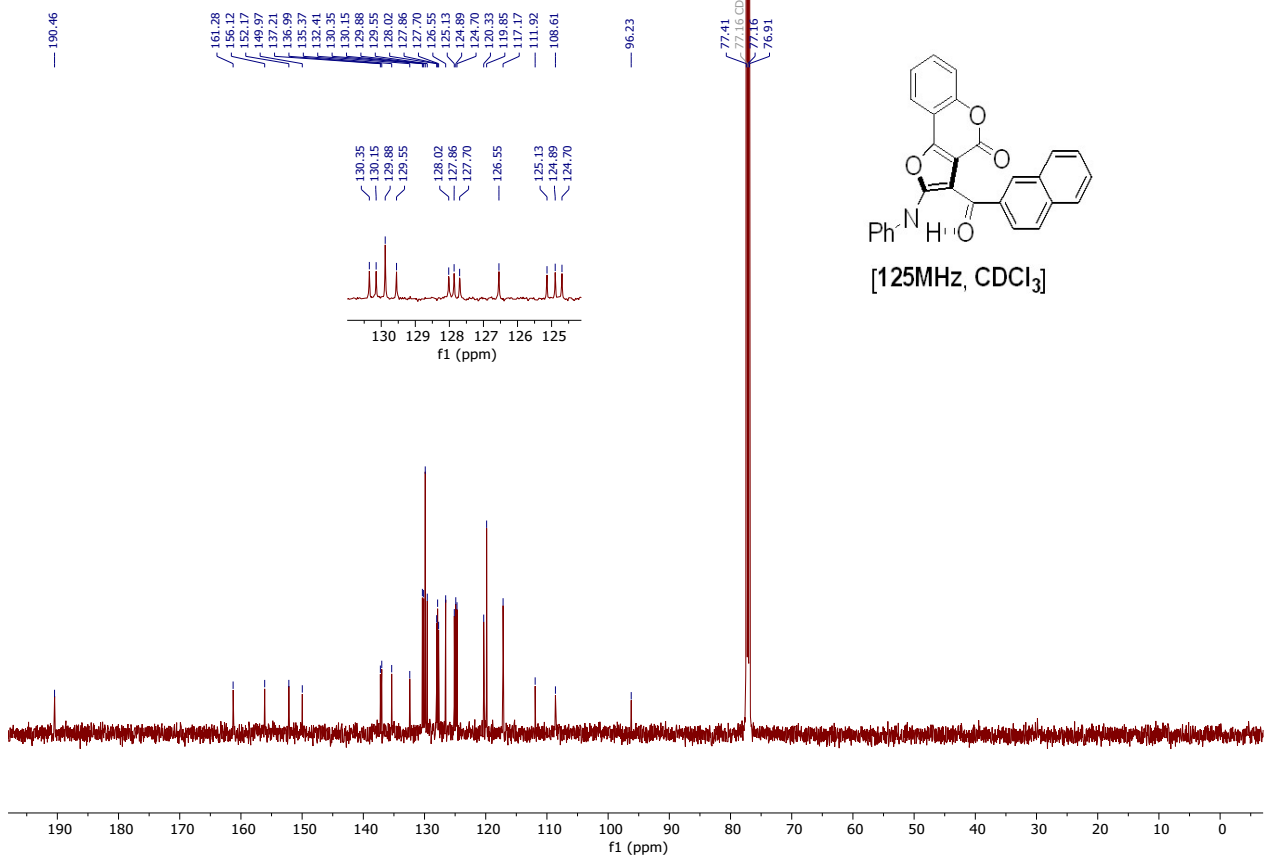





# $^1\text{H}$ and $^{13}\text{C}\{^1\text{H}\}$ NMR spectra of Compound 3t

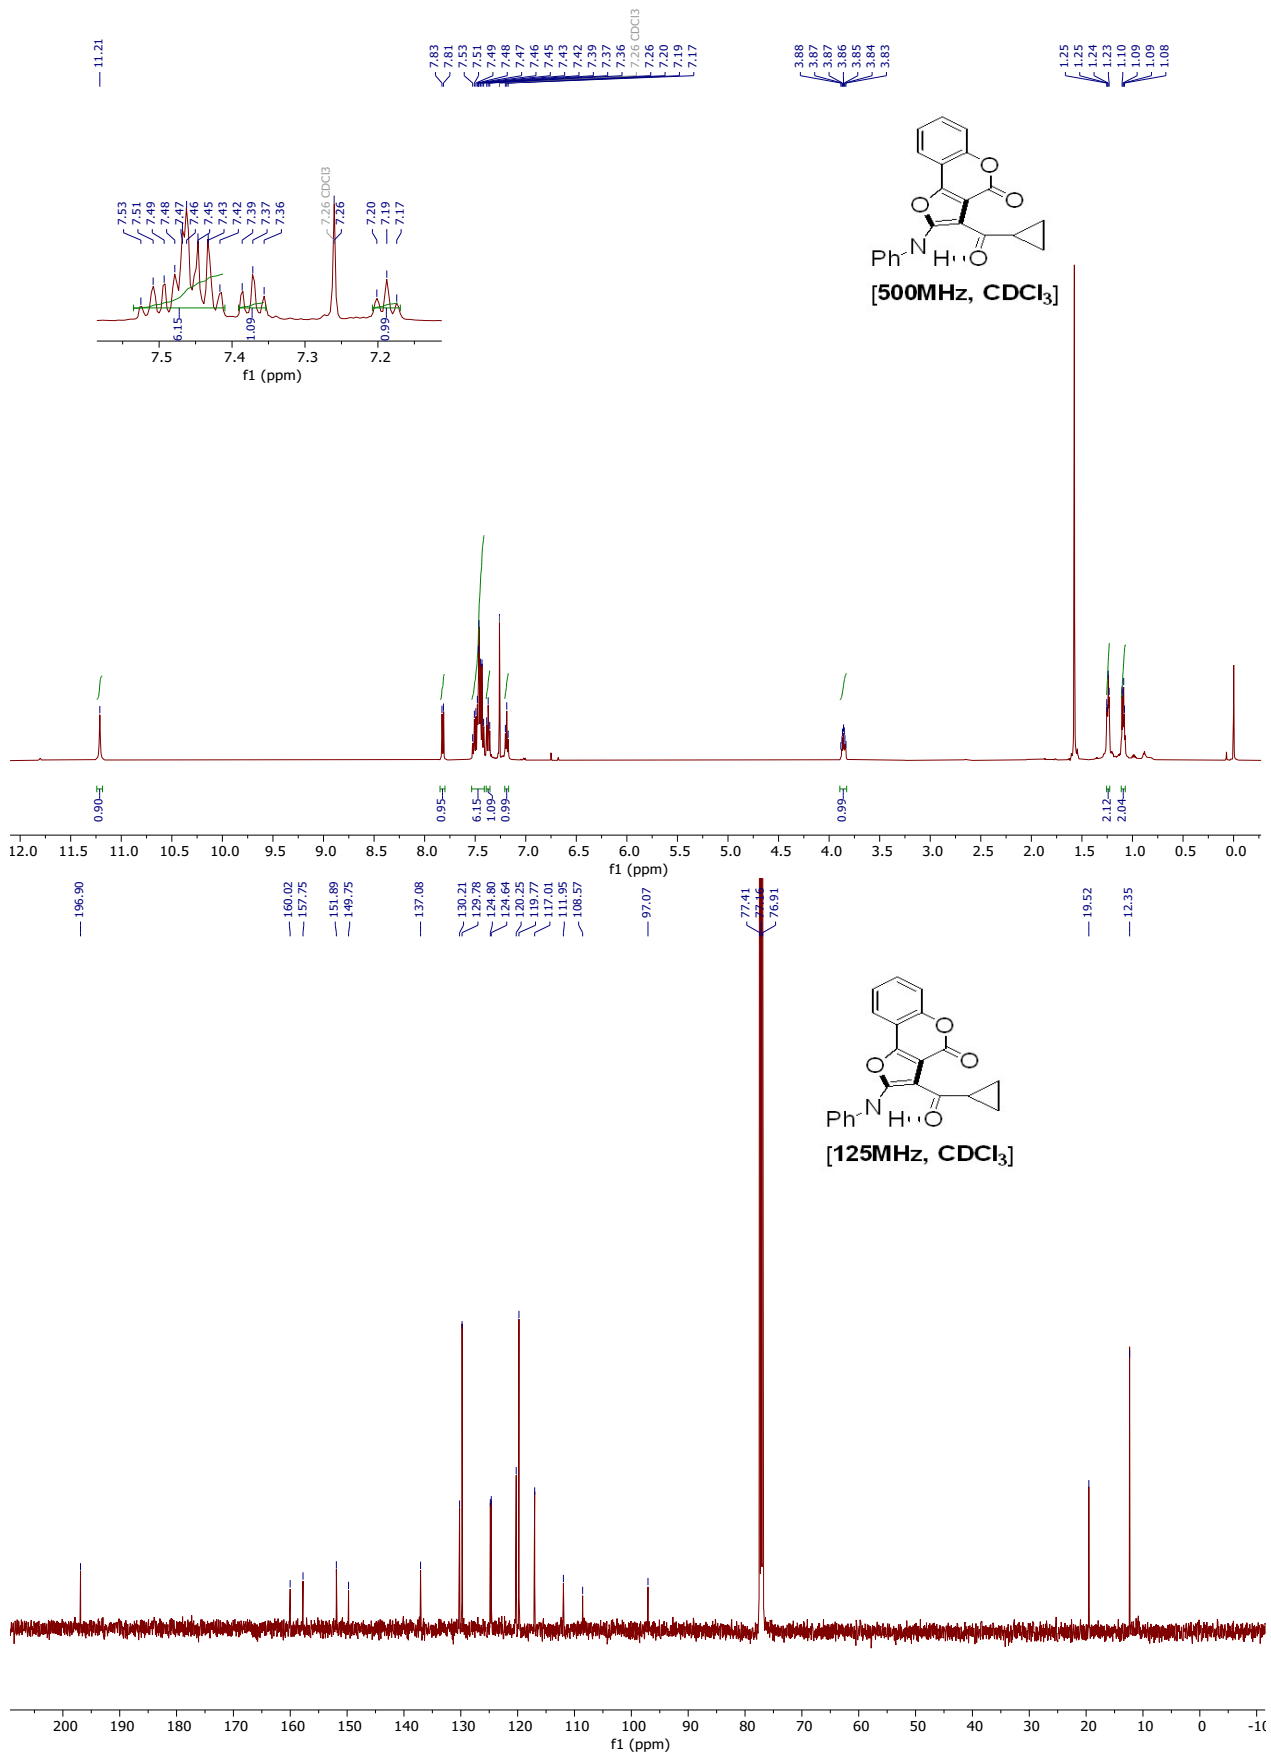

# $^1\text{H}$ and $^{13}\text{C}\{^1\text{H}\}$ NMR spectra of Compound 3u

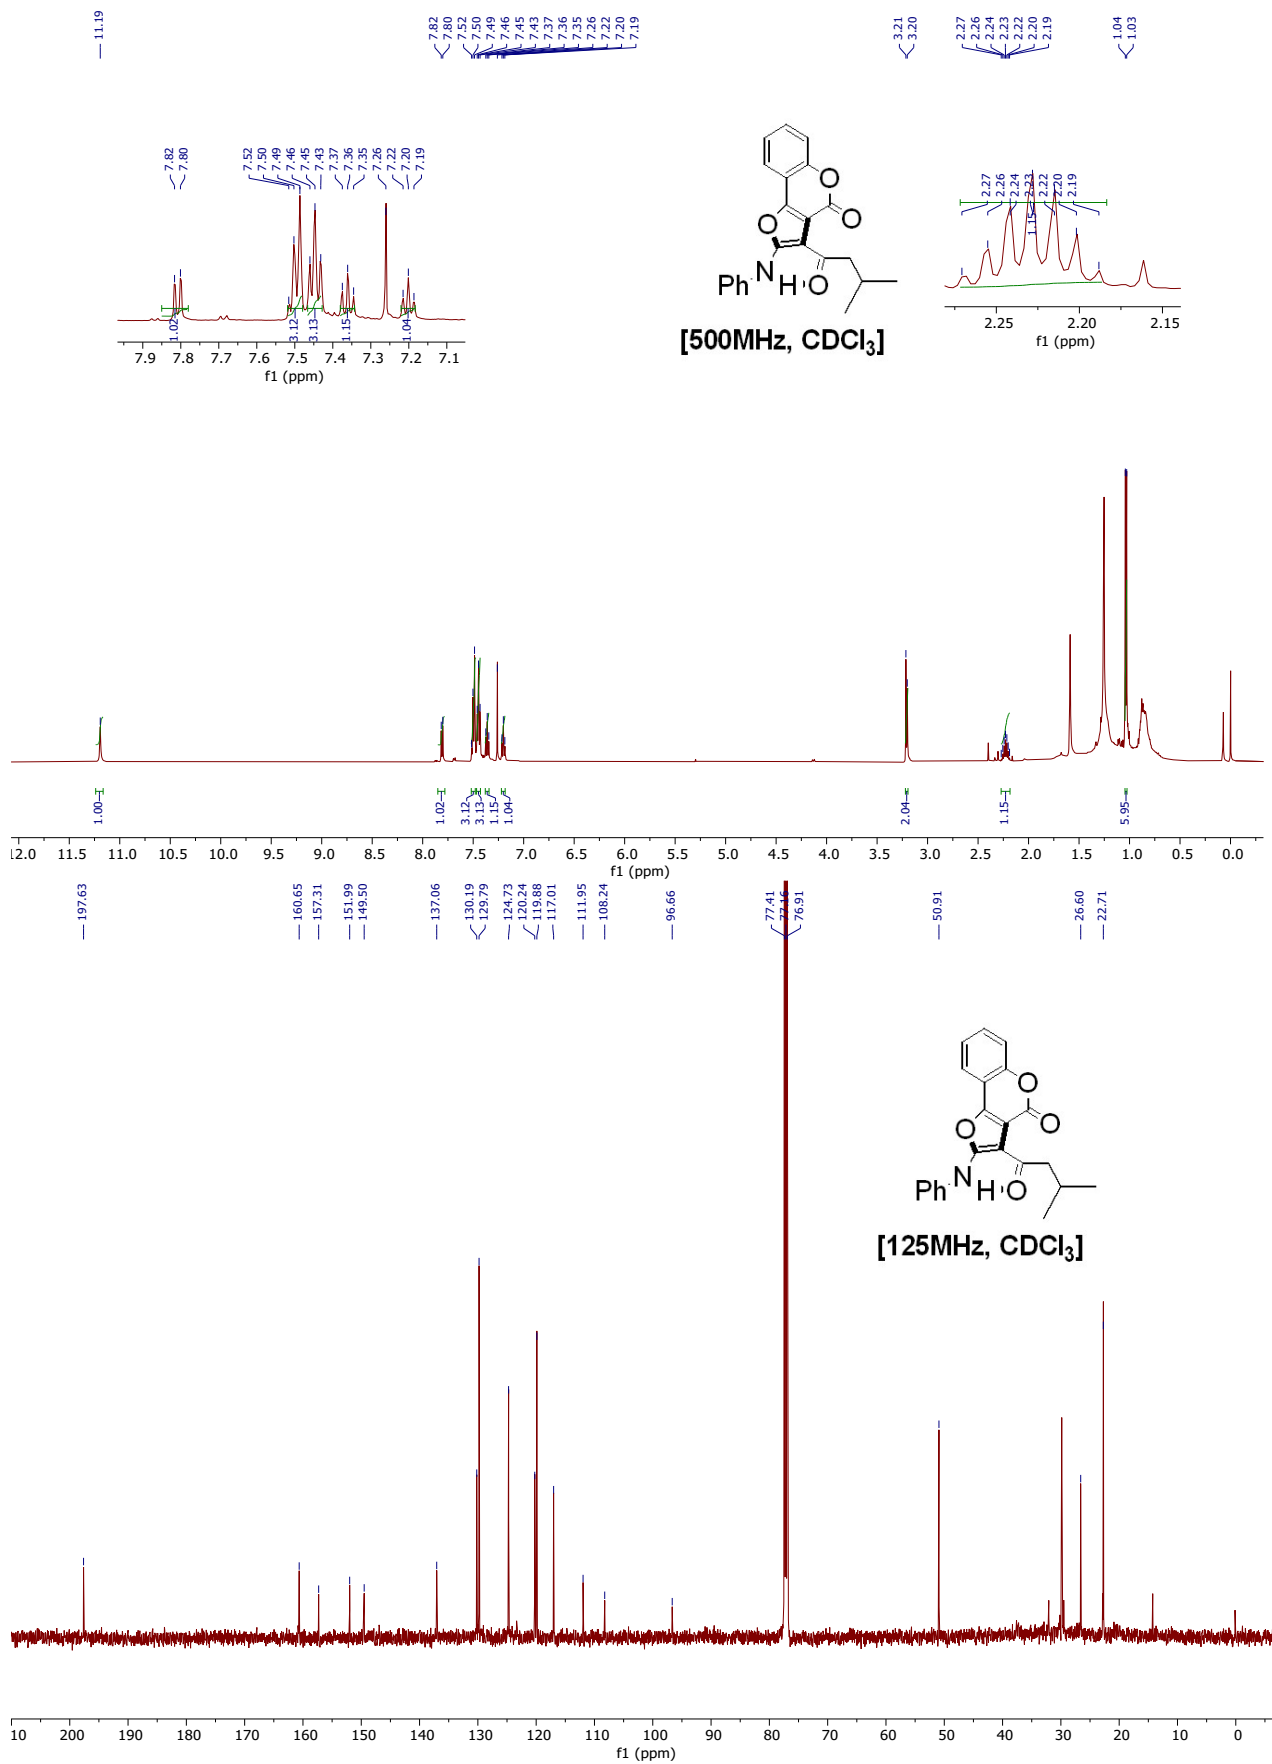

# $^1\text{H}$ and $^{13}\text{C}\{^1\text{H}\}$ NMR spectra of Compound 3v

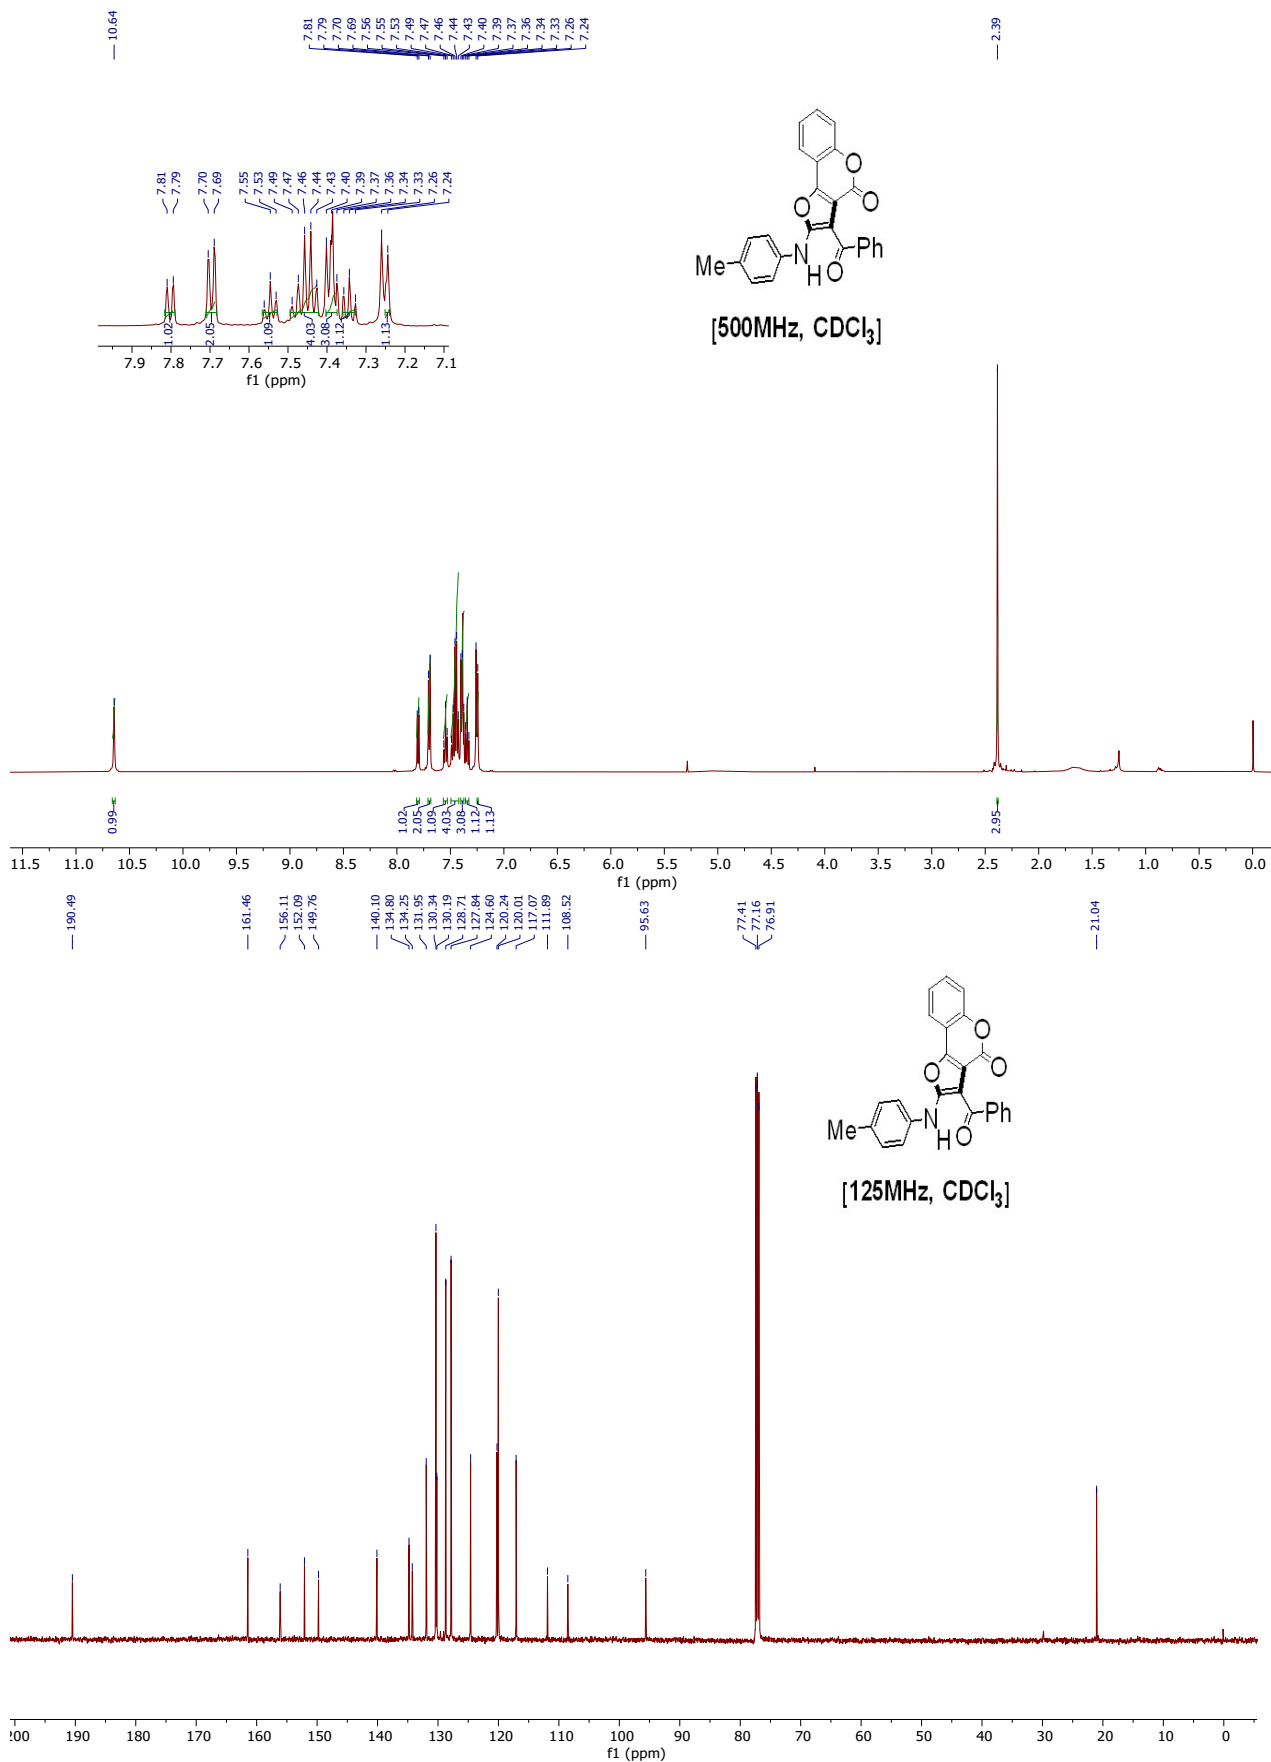

# $^1\text{H}$ and $^{13}\text{C}\{^1\text{H}\}$ NMR spectra of Compound 3w

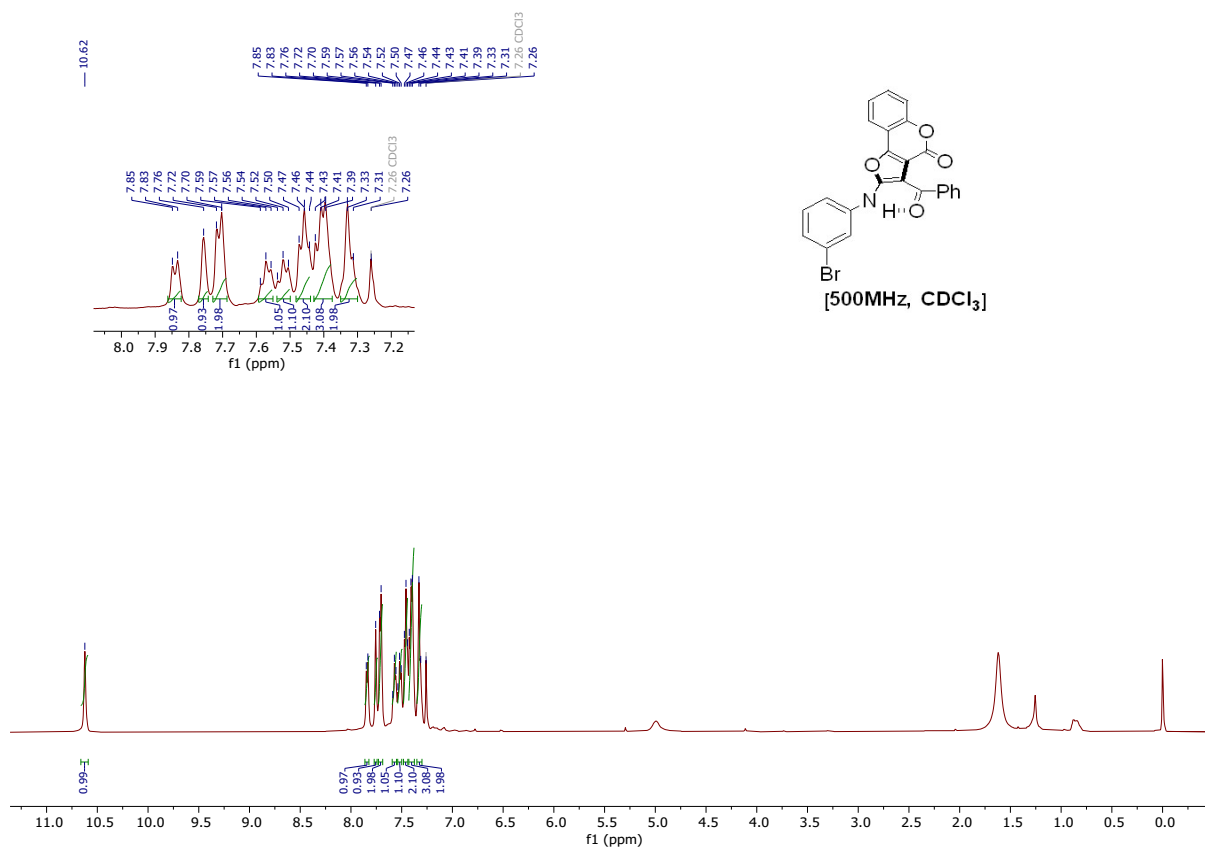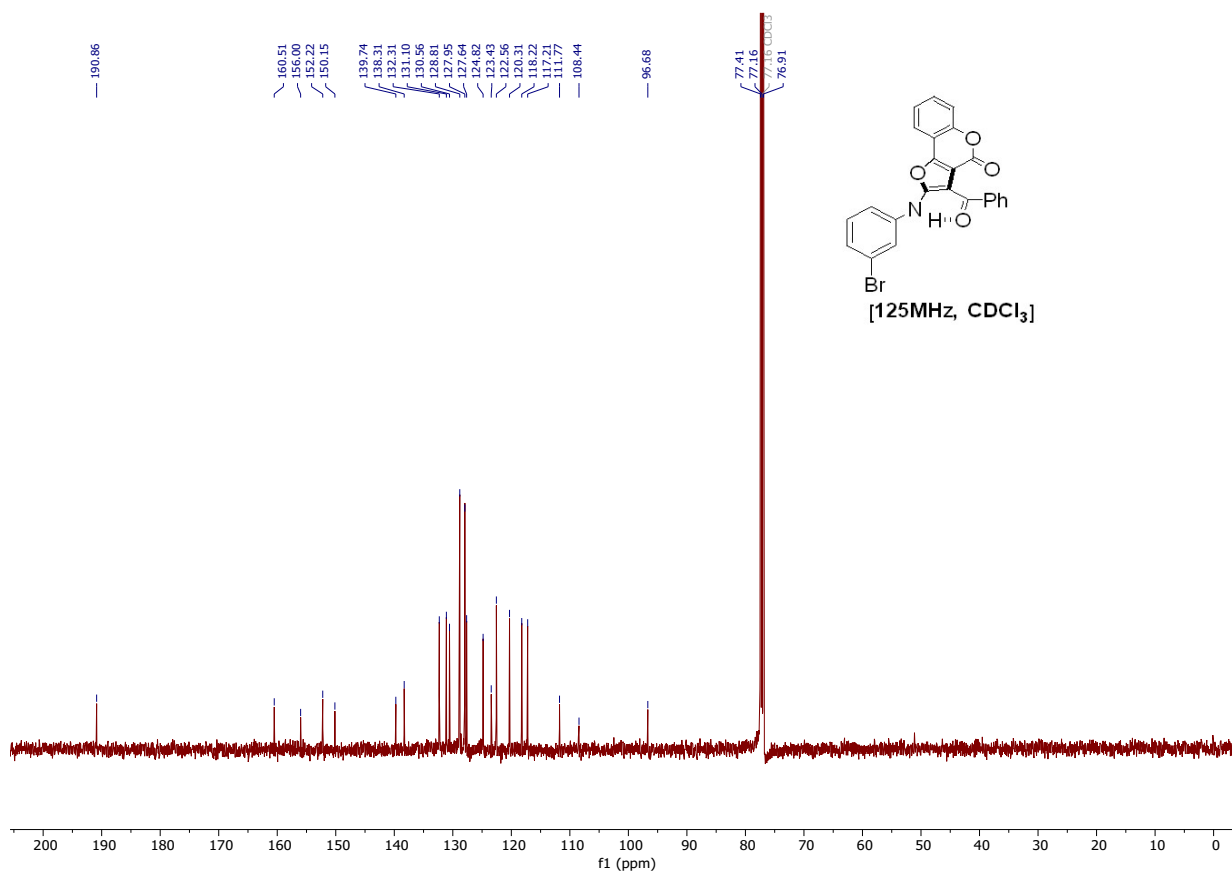

# $^1\text{H}$ and $^{13}\text{C}\{^1\text{H}\}$ NMR spectra of Compound 3x

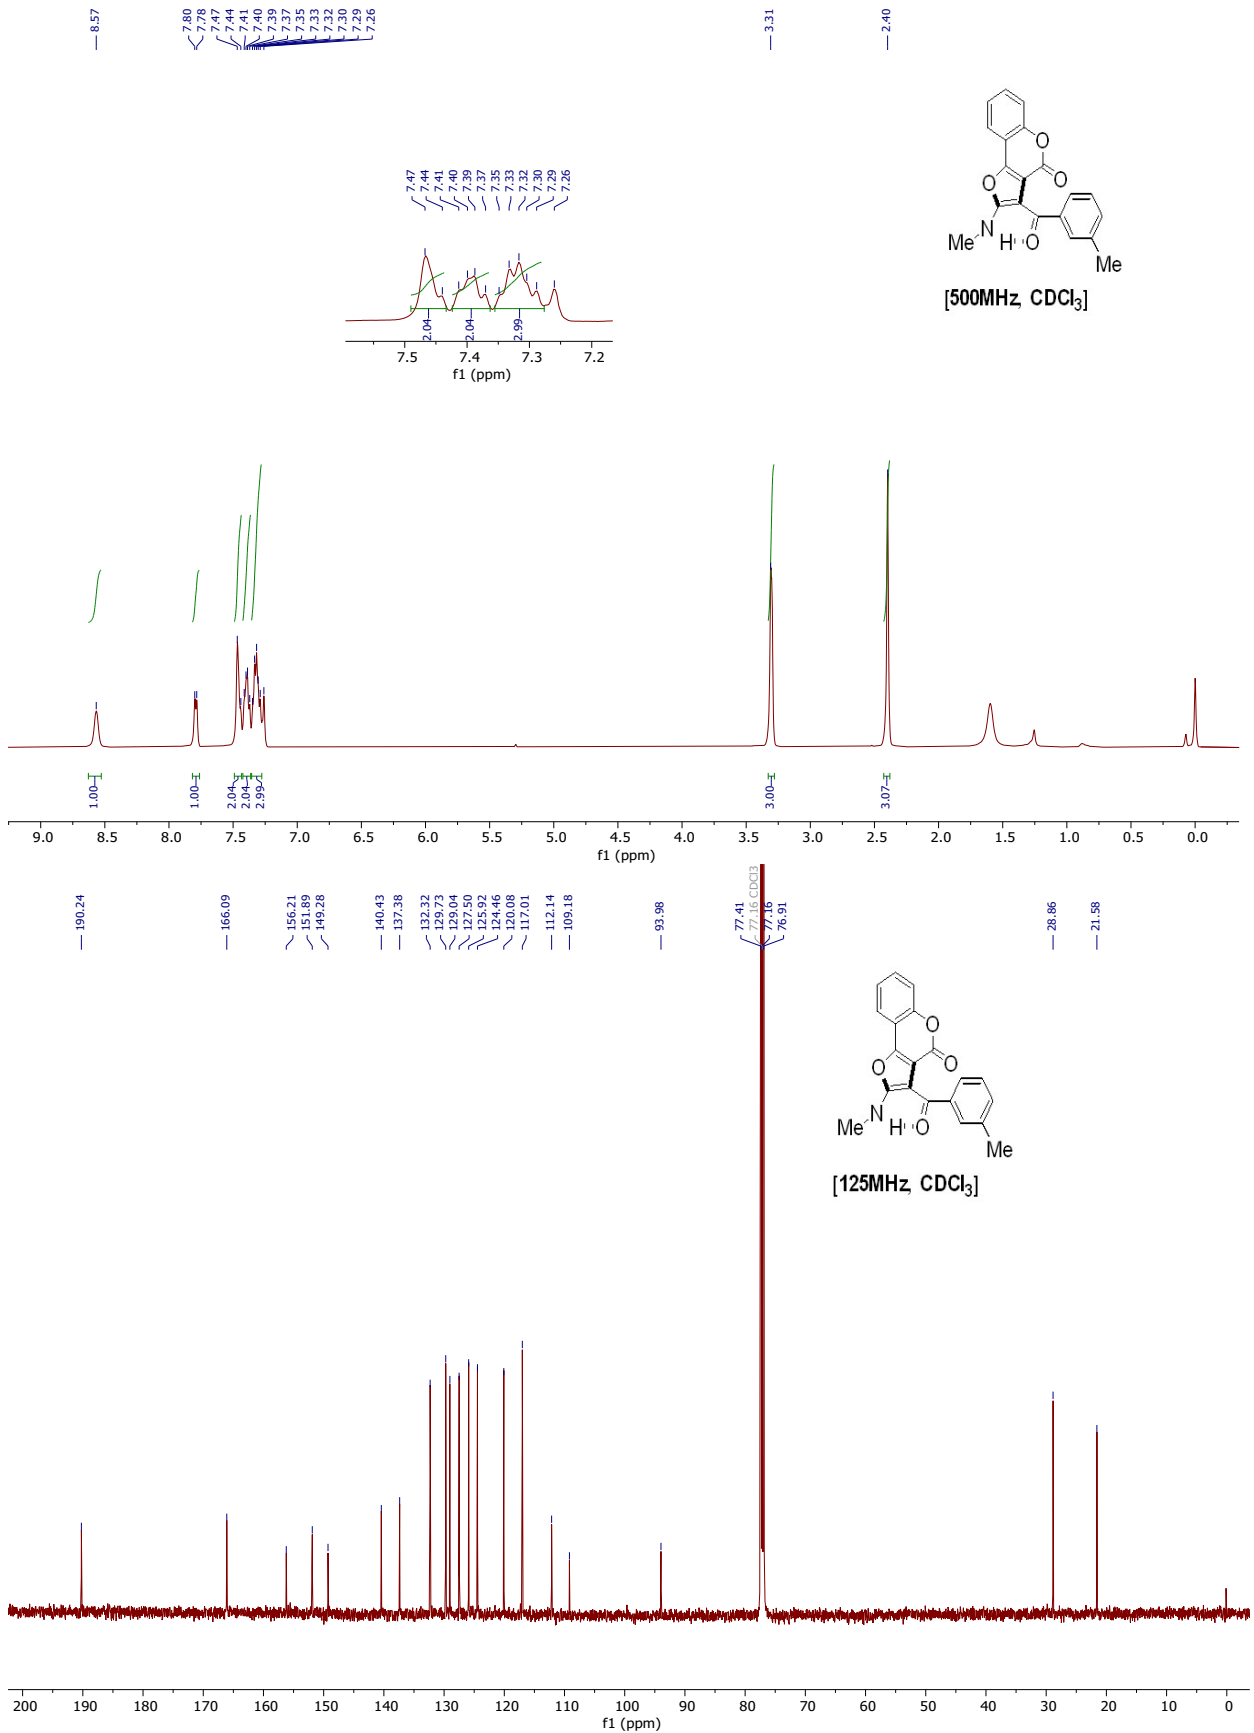

# $^1\text{H}$ and $^{13}\text{C}\{^1\text{H}\}$ NMR spectra of Compound 3y

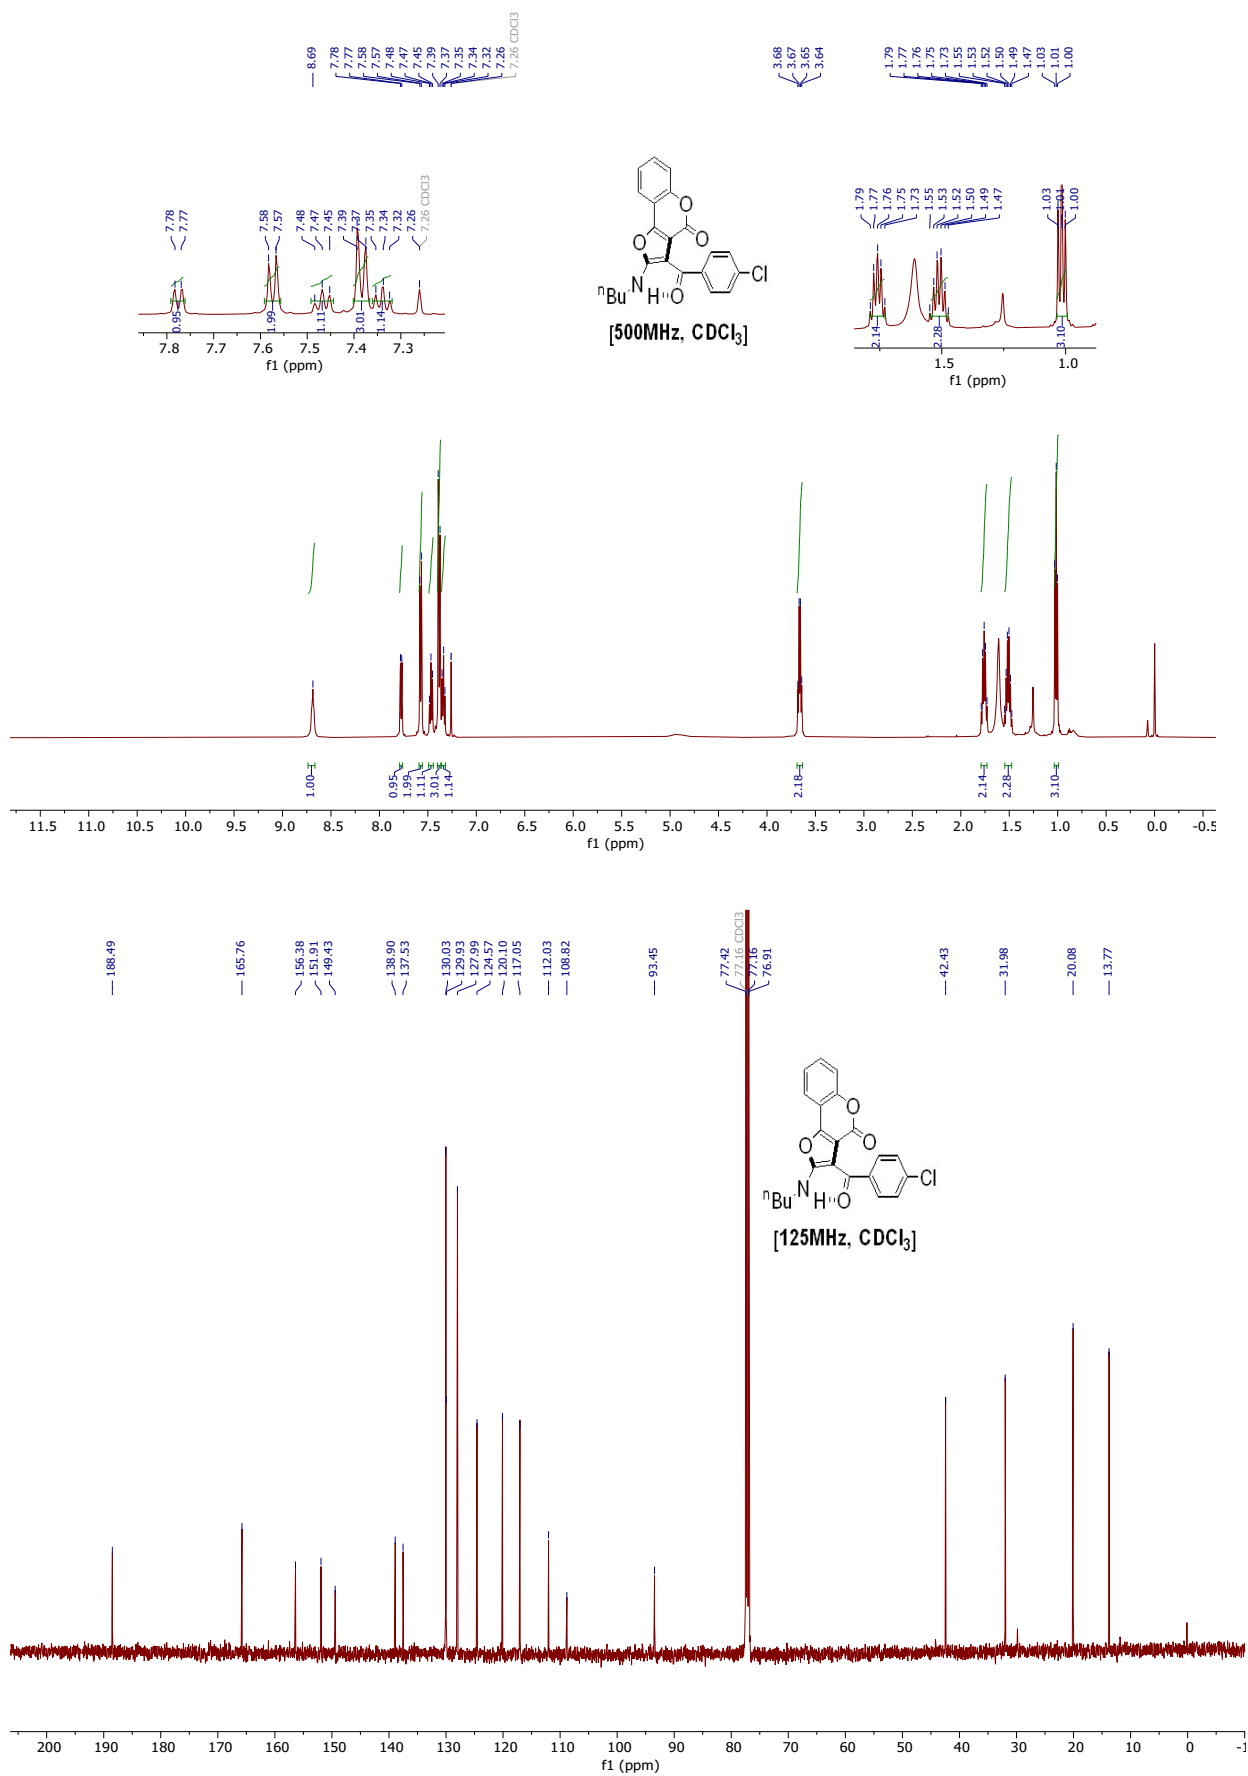

# $^1\text{H}$ and $^{13}\text{C}\{^1\text{H}\}$ NMR spectra of Compound 3z

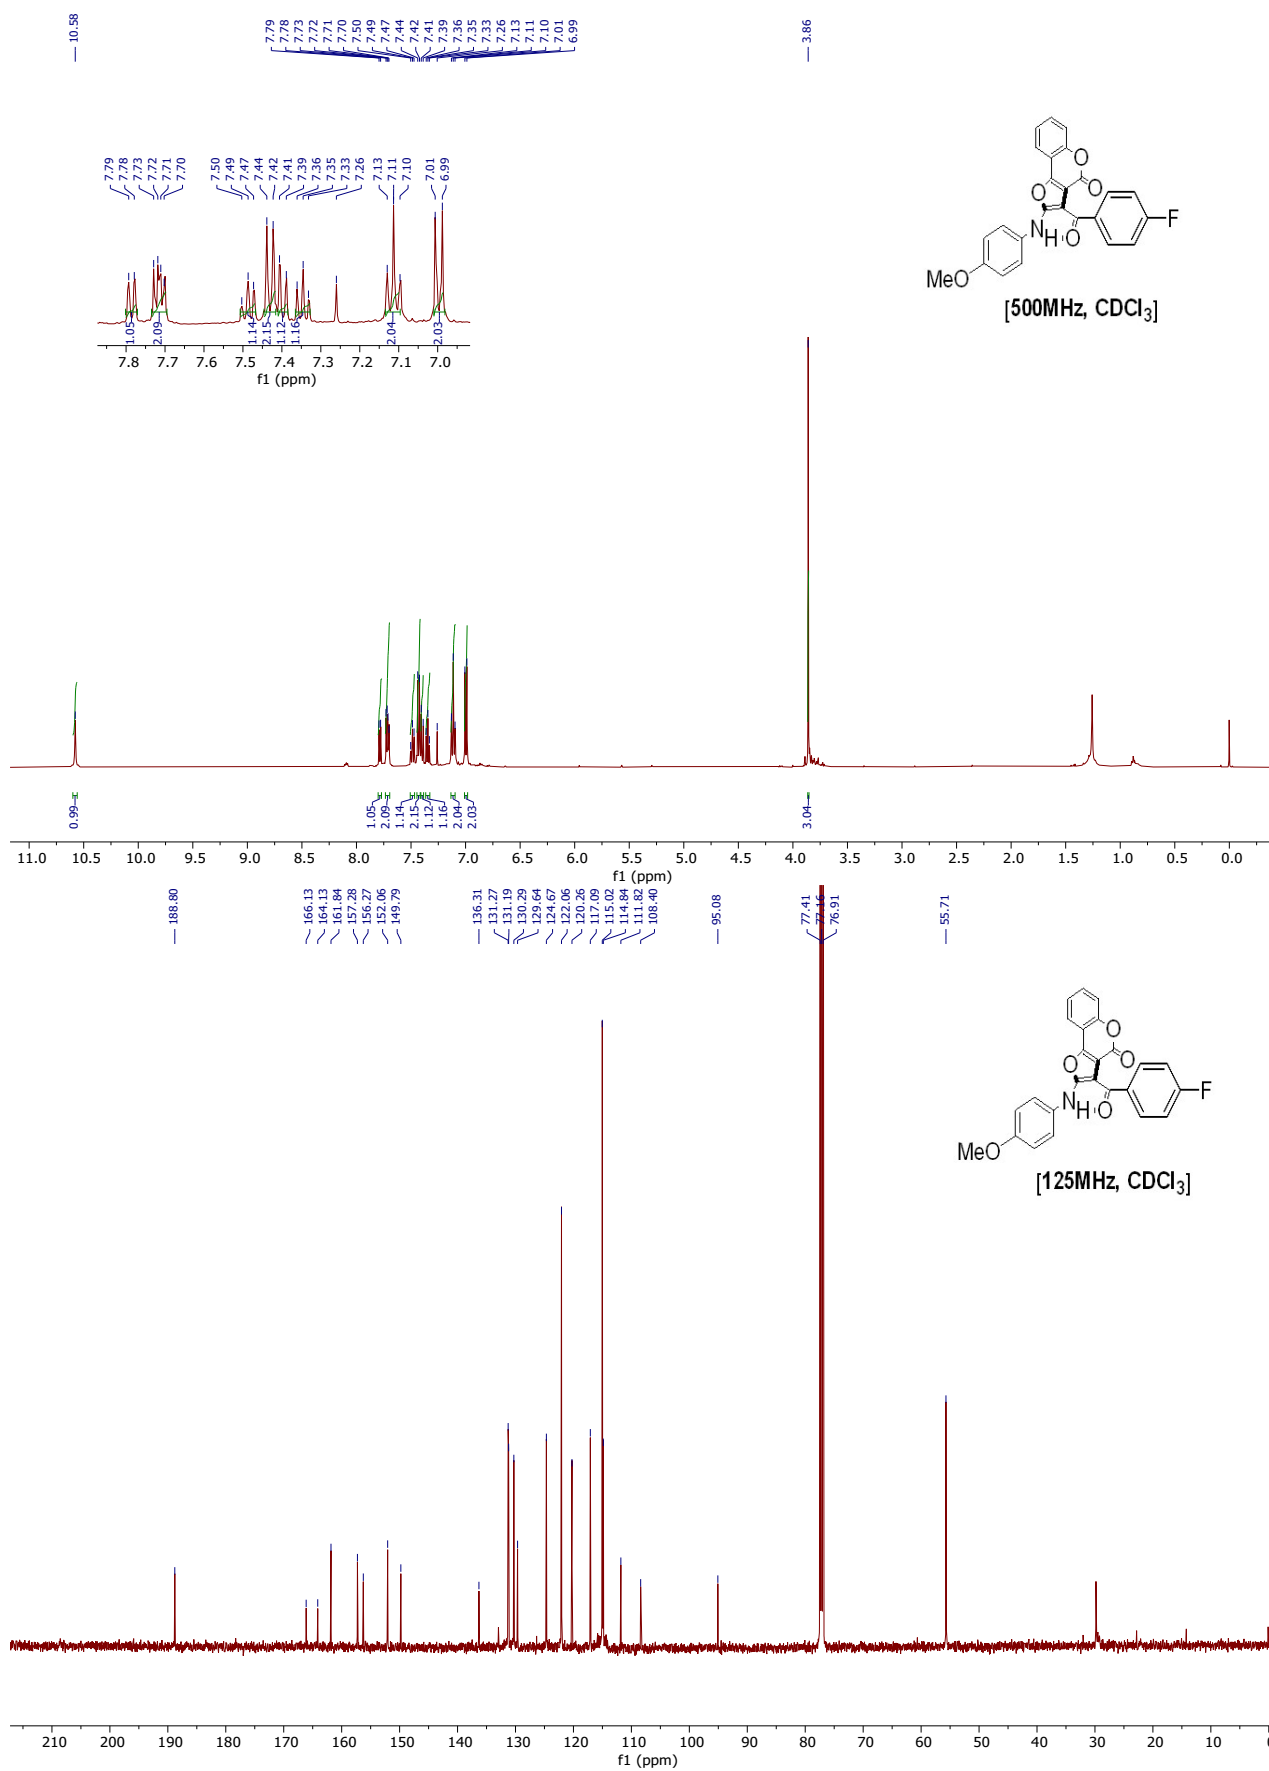



# $^1\text{H}$ and $^{13}\text{C}\{^1\text{H}\}$ NMR spectra of Compound 3za

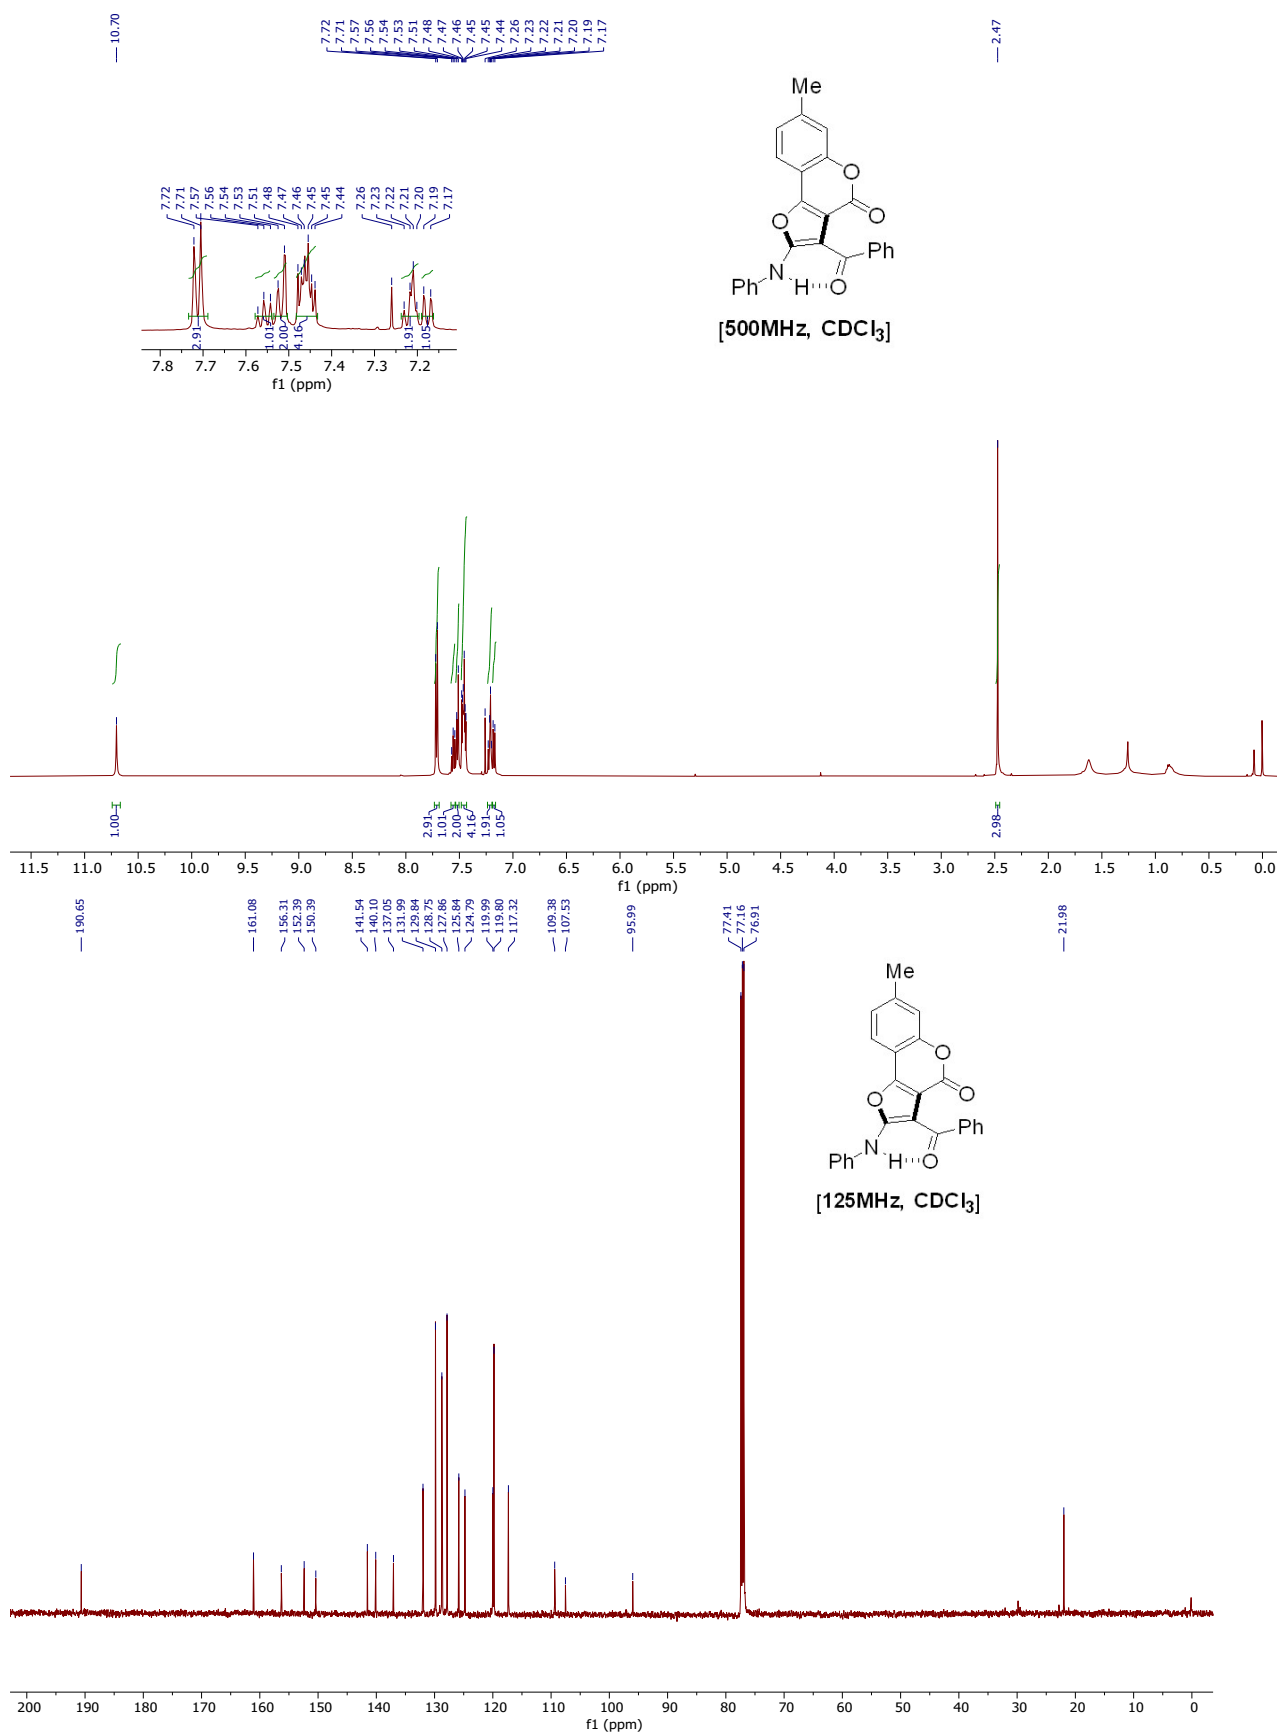



# $^1\text{H}$ and $^{13}\text{C}\{^1\text{H}\}$ NMR spectra of Compound 3zc

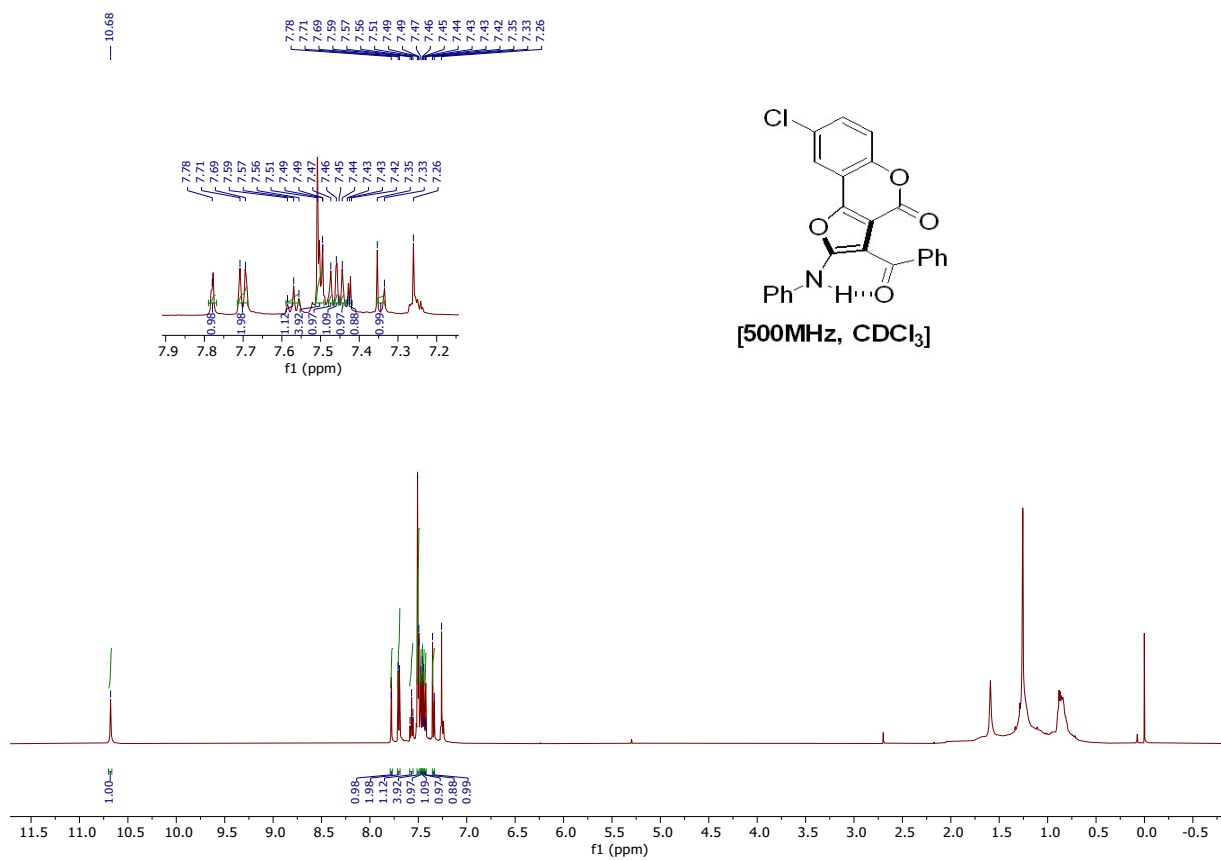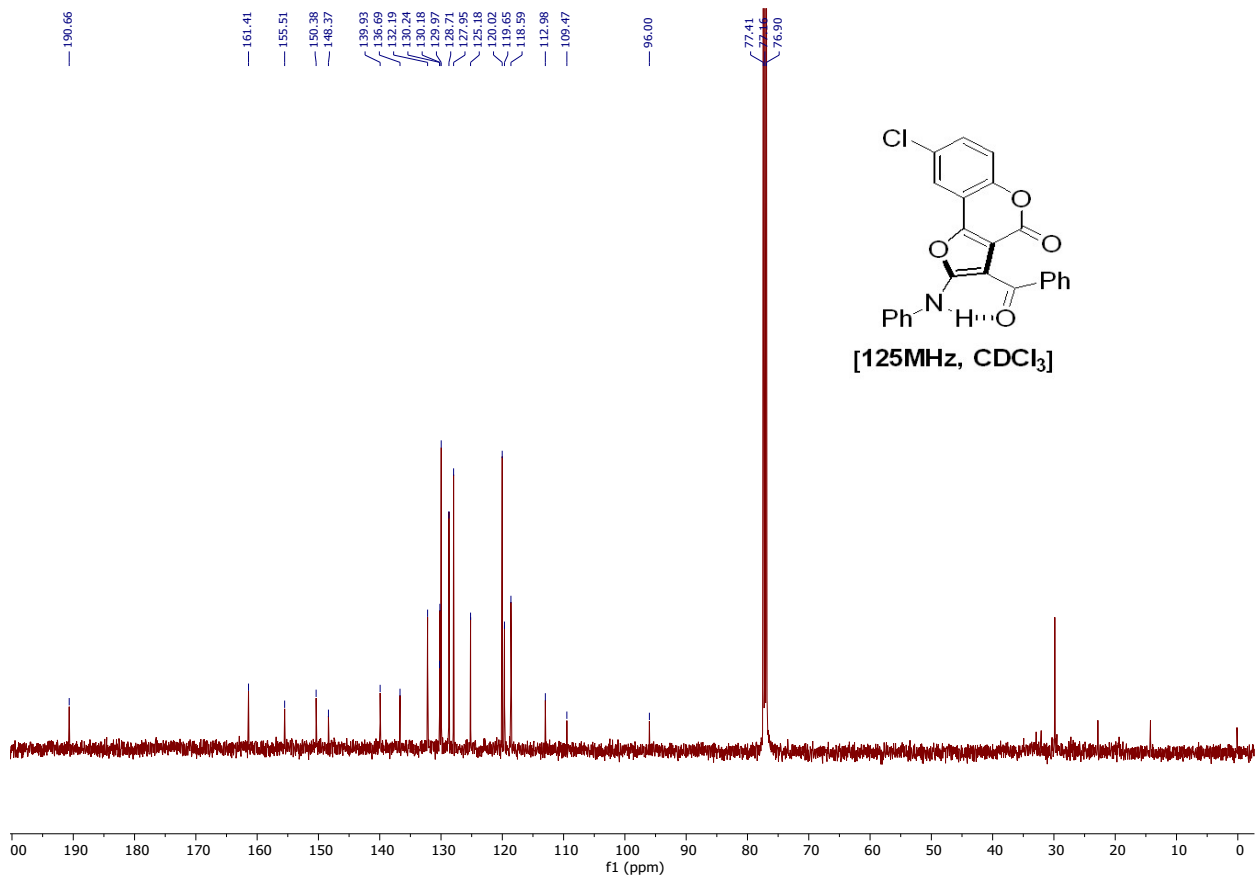

# $^1\text{H}$ and $^{13}\text{C}\{^1\text{H}\}$ NMR spectra of Compound 3zd

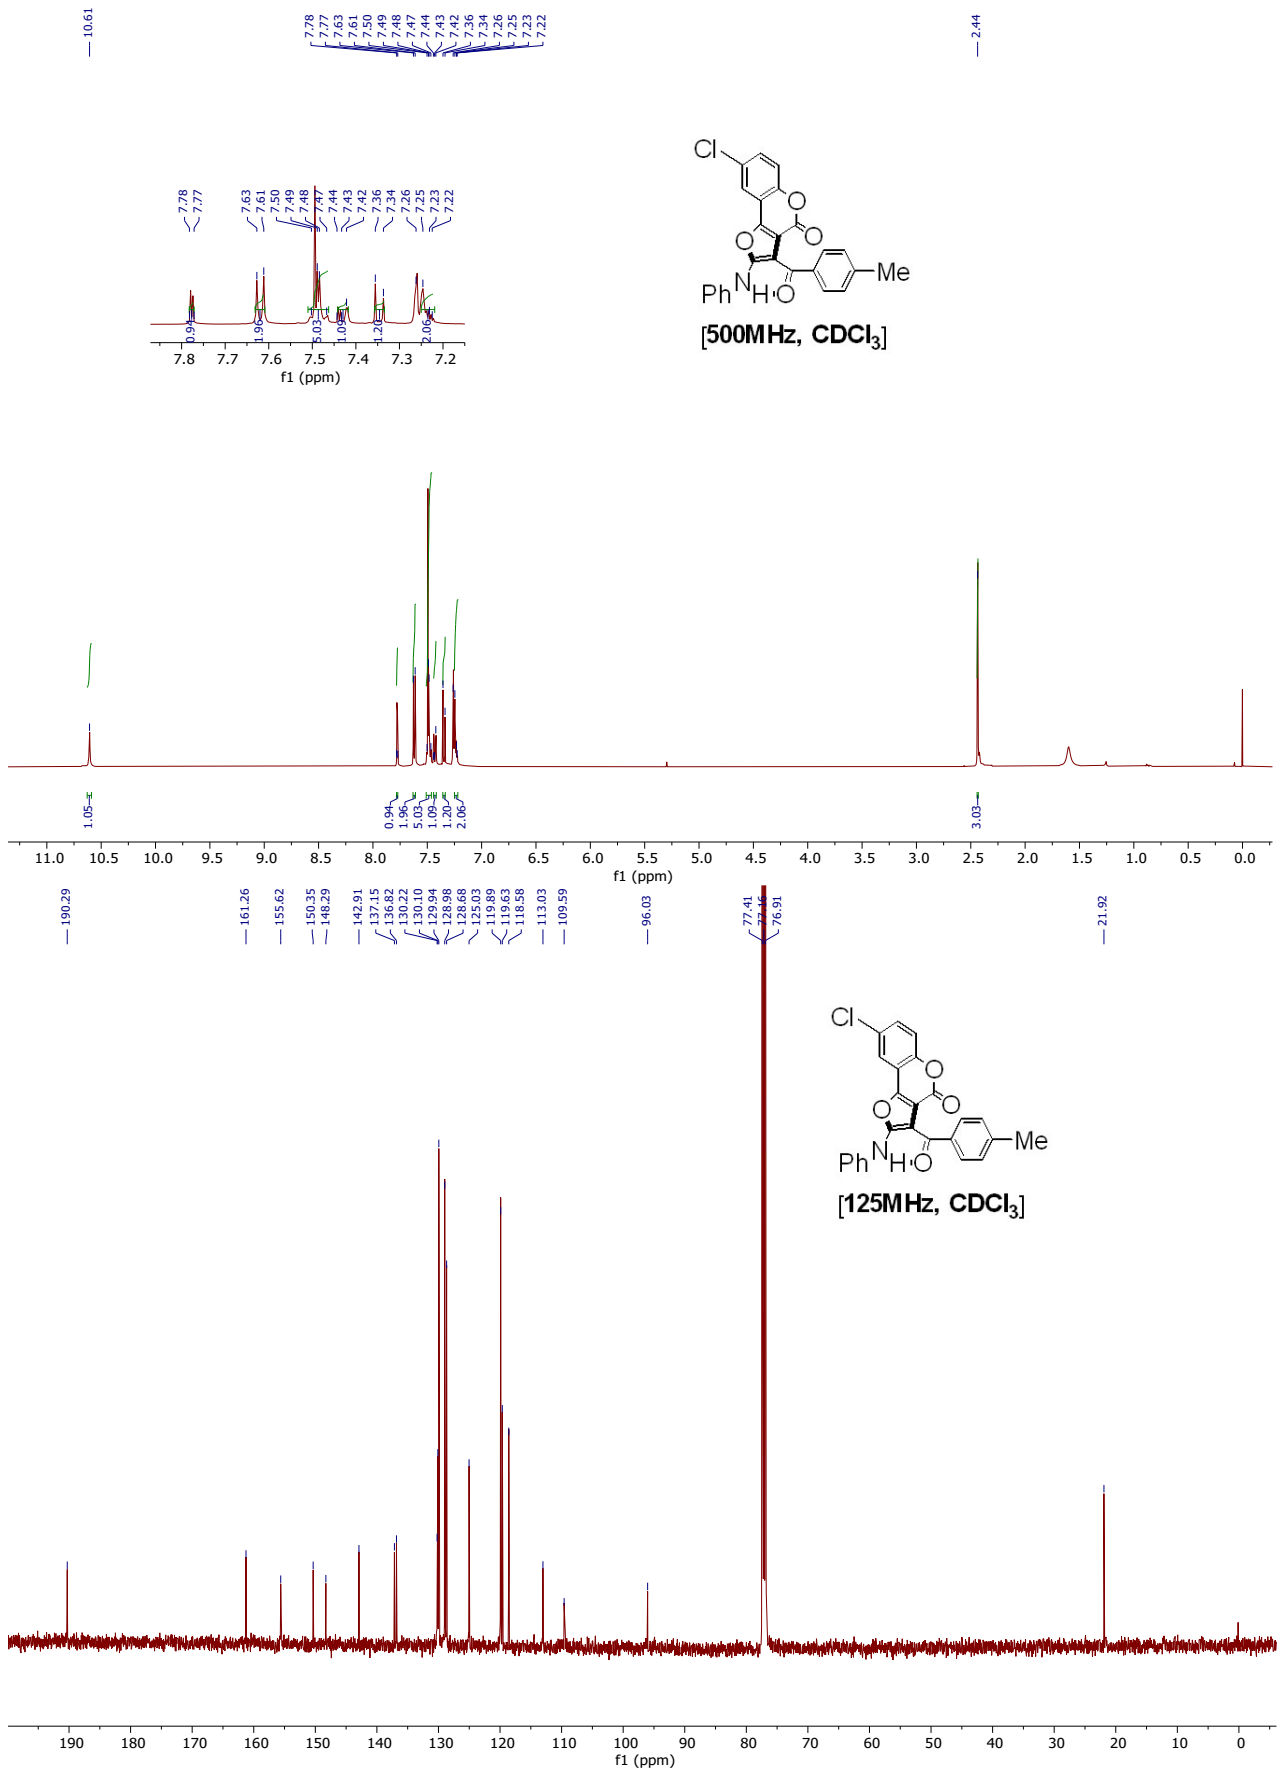





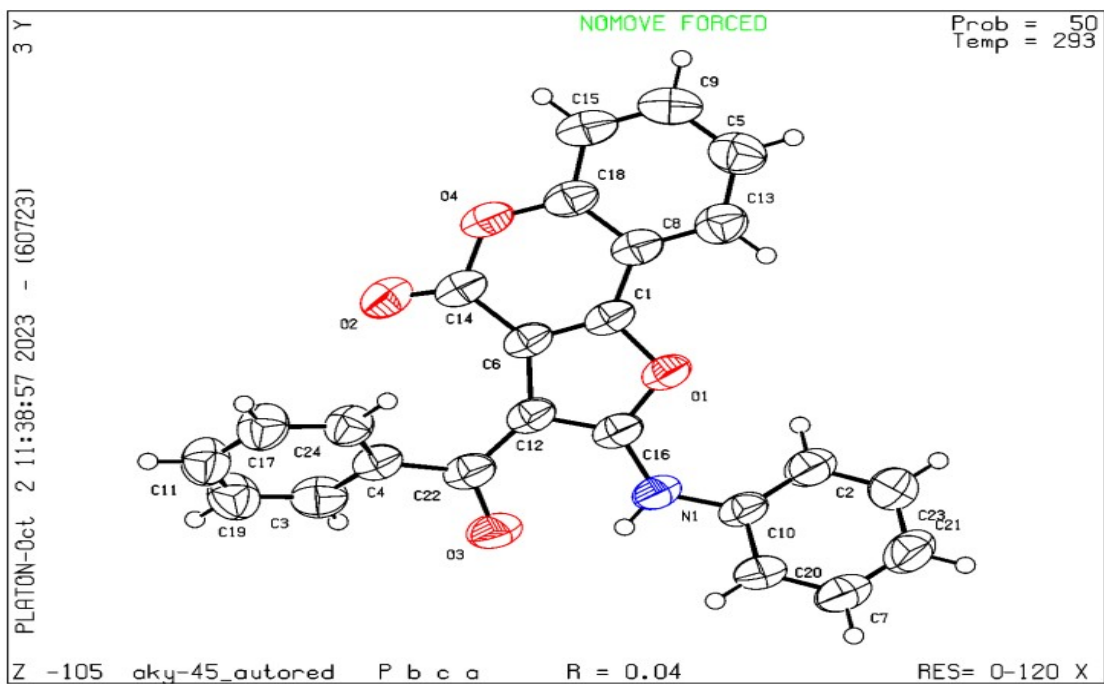

**Fig: S1.** ORTEP with 50% thermal ellipsoid probability level

## 6.2 X-Ray Crystallographic Data & ORTEP diagram of 3d (CCDC No. 2298674)

Bond precision: C-C = 0.0073 Å Wavelength=1.54184  
Cell: a=11.5055(5) b=22.2353(8) c=8.1847(4)  
alpha=90 beta=107.478(5) gamma=90  
Temperature: 293 K

|                        | Calculated   | Reported     |
|------------------------|--------------|--------------|
| Volume                 | 1997.21(16)  | 1997.21(16)  |
| Space group            | P 21/c       | P 1 21/c 1   |
| Hall group             | -P 2ybc      | -P 2ybc      |
| Moiety formula         | C26 H19 N O4 | C26 H19 N O4 |
| Sum formula            | C26 H19 N O4 | C26 H19 N O4 |
| Mr                     | 409.42       | 409.42       |
| Dx, g cm <sup>-3</sup> | 1.362        | 1.362        |
| Z                      | 4            | 4            |
| Mu (mm <sup>-1</sup> ) | 0.749        | 0.749        |
| F000                   | 856.0        | 856.0        |
| F000'                  | 858.68       |              |
| h, k, lmax             | 14, 27, 10   | 14, 27, 10   |
| Nref                   | 3933         | 3910         |
| Tmin, Tmax             | 0.835, 0.993 | 0.776, 1.000 |
| Tmin'                  | 0.688        |              |

Correction method= # Reported T Limits: Tmin=0.776 Tmax=1.000  
AbsCorr = MULTI-SCAN

Data completeness= 0.994 Theta(max)= 72.272

R(reflections)= 0.0970( 1951)

wR2(reflections)=  
0.3435( 3910)

S = 1.015

Npar= 281

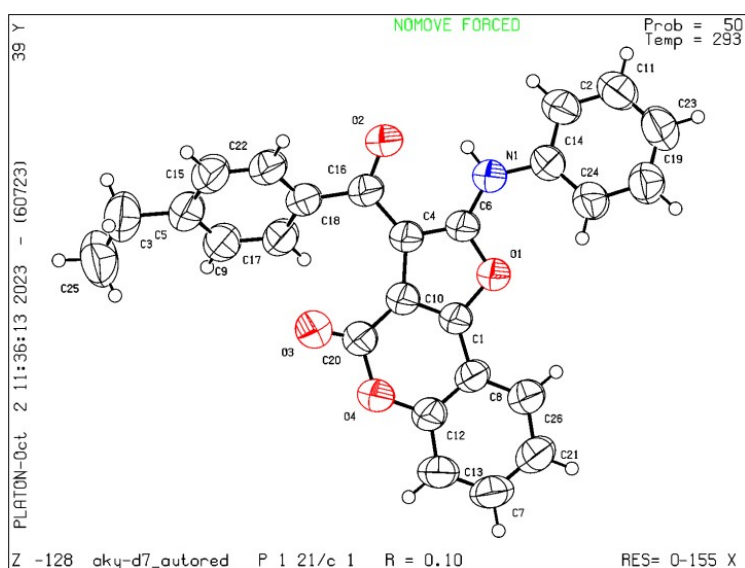

Fig: S2. ORTEP with 50% thermal ellipsoid probability level



## 7. HRMS spectra of reaction mixture

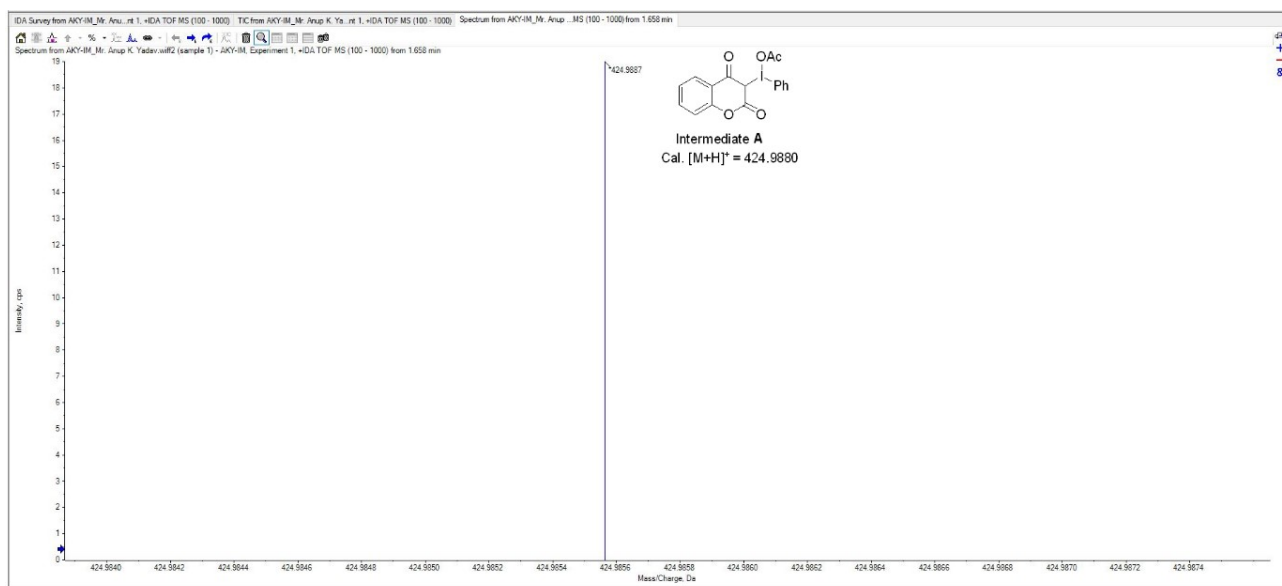

Fig: S3. HRMS spectra of reaction mixture containing intermediate A peak

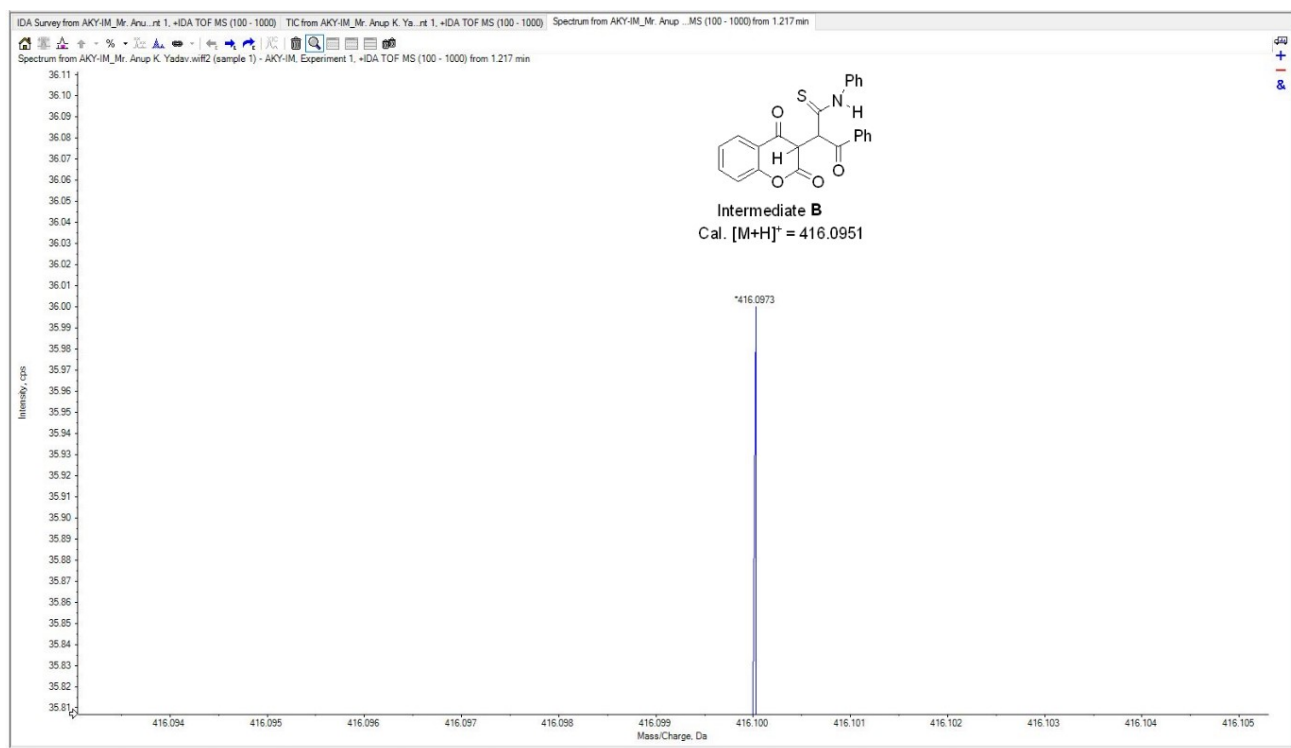

Fig: S4. HRMS spectra of reaction mixture containing intermediate B peak

## 8. AAS data of compound 2c

|            |         |         |         |        |
|------------|---------|---------|---------|--------|
| Sample 089 |         |         |         |        |
| Conc       | -0.009  | -0.009  | -0.013  | 0.0118 |
| %RSD       | 20.2    | 0.0     | >100    | 8.6    |
| Mean Abs   | -0.0007 | -0.0009 | -0.0004 | 0.0038 |

### SpectrAA Report.

10:25 17-04-2024

| Sample ID  | Cu<br>mg/L | Mn<br>mg/L | Fe<br>mg/L | Zn<br>mg/L |
|------------|------------|------------|------------|------------|
| Sample 090 |            |            |            |            |
| Conc       | -0.021     | 0.005      | 0.019      | 0.0111     |
| %RSD       | 55.9       | 0.0        | 36.4       | 10.0       |
| Mean Abs   | -0.0018    | 0.0005     | 0.0006     | 0.0036     |
| Sample 091 |            |            |            |            |
| Conc       | -0.020     | 0.002      | -0.028     | 0.0135     |
| %RSD       | 47.2       | 0.0        | >100       | 8.5        |
| Mean Abs   | -0.0017    | 0.0002     | -0.0010    | 0.0044     |
| Sample 092 |            |            |            |            |
| Conc       | -0.009     | -0.009     | 0.059      | 0.0254     |
| %RSD       | 18.4       | 0.0        | 22.9       | 3.7        |
| Mean Abs   | -0.0008    | -0.0008    | 0.0020     | 0.0082     |
| Sample 093 |            |            |            |            |
| Conc       | -0.002     | 0.000      | -0.016     | 0.0623     |
| %RSD       | 13.6       | 0.0        | >100       | 1.5        |
| Mean Abs   | -0.0001    | 0.0000     | -0.0005    | 0.0201     |

**Table: S1.** AAS data of compound **2c**, sample no. 089-091 = Blank (only 1,4-dioxane), sample no. 092-093 = compound **2c** in 1,4-dioxane.

The AAS data of one of the starting materials **2c** were observed via Agilent Technologies 200 series AA 240FS AA from the above AAS data, it is evident there was no metal (Cu, Mn, Fe, Zn) residue involved during the course of the reaction.
